# Supplementary material for: The Targeted Pesticides as Acetylcholinesterase Inhibitors: Comprehensive Cross-Organism Molecular Modelling Studies Performed to Anticipate the Pharmacology of Harmfulness to Humans In Vitro
Source: PubMed Central journal article supplement (PMC6225315; doi:10.3390/molecules23092192), 2018-08-30
Supplement: molecules-23-02192-s001.pdf [file molecules-23-02192-s001.pdf]

# The targeted pesticides as Acetylcholinesterase inhibitors: comprehensive cross-organism molecular modelling studies performed to anticipate the pharmacology of harmfulness to humans *in vitro*

Milan Mladenović<sup>1,\*</sup>, Biljana B. Arsić<sup>2,3</sup>, Nevena Stanković<sup>1</sup>, Nezrina Mihović<sup>1</sup>, Rino Ragno<sup>4,5</sup>, Andrew Regan<sup>6</sup>, Jelena S. Milićević<sup>7</sup>, Tatjana M. Trtić-Petrović<sup>7</sup>, Ružica Micić<sup>8</sup>

<sup>1</sup> Kragujevac Center for Computational Biochemistry, Faculty of Science, University of Kragujevac, Radoja Domanovića 12, 34000 Kragujevac, P.O. Box 60, Republic of Serbia

<sup>2</sup> Department of Mathematics, Faculty of Sciences and Mathematics, University of Niš, Višegradska 33, 18000 Niš, Republic of Serbia

<sup>3</sup> Division of Pharmacy and Optometry, University of Manchester, Oxford Road, M13 9PT, Manchester, United Kingdom

<sup>4</sup> Rome Center for Molecular Design, Department of Drug Chemistry and Technologies, Faculty of Pharmacy and Medicine, Sapienza Rome University, P.le A. Moro 5, 00185, Rome, Italy

<sup>5</sup> Alchemical Dynamics srl 00125 Rome, Italy

<sup>6</sup> School of Chemistry, University of Manchester, Oxford road, M13 9PL, Manchester, United Kingdom

<sup>7</sup> Vinča Institute of Nuclear Sciences, University of Belgrade, PO Box 522, 11001 Belgrade, Republic of Serbia

<sup>8</sup> Faculty of Sciences and Mathematics, University of Priština, Lole Ribara 29, 38220 Kosovska Mitrovica, Republic of Serbia

\* Correspondence: mmladenovic@kg.ac.rs; Tel.: +381-34-336-223, ext. 255

## CONTENTS

**Figure S1.** The sequence alignment between the *Mus musculus* and *Homo sapiens* AChE.

**Figure S2.** Vina-based The SB alignment assessment of (a) co-crystallized *m*AChE inhibitor (PDB ID: 4A16), EC pink, ECRD yellow, RCRD green, ECCD black, RCCD red, and (b) co-crystallized *h*AChE inhibitor (PDB ID: 4BDT), EC pink, ECRD yellow, RCRD green, ECCD black, RCCD red.

**Figure S3.** The SB alignment of propazine (a), carbaryl (b), tebufenozide (c), and acetamiprid (d) into the *m*AChE active site. The enzyme ribbons are presented in blue, active site amino acids are depicted in white. For the clarity purpose, hydrogen atoms are omitted from presentation.

**Figure S4.** The SB alignment of diuron (a), monuron (b), and linuron (c), into the *m*AChE active site. The enzyme ribbons are presented in blue, active site amino acids are depicted in white. For the clarity purpose, hydrogen atoms are omitted from presentation.

**Figure S5.** The SB alignment of propazine (a), carbaryl (b), tebufenozide (c), and acetamiprid (d) into the *h*AChE active site. The enzyme ribbons are presented in blue, active site amino acids are depicted in white. For the clarity purpose, hydrogen atoms are omitted from presentation.

**Figure S6.** The SB alignment of diuron (a), monuron (b), and linuron (c), into the *h*AChE active site. The enzyme ribbons are presented in blue, active site amino acids are depicted in white. For the clarity purpose, hydrogen atoms are omitted from presentation.





**Figure S35.** The SB alignment of azamethiphos (**a**), azinphos-methyl (**b**), chlorpyrifos (**c**), DDVP (**d**), diazinon (**e**), and fenitrothion (**f**) into the *m*AChE active site. The enzyme ribbons are presented in blue, active site amino acids are depicted in white. For the clarity purpose, hydrogen atoms are omitted from presentation.

**Figure S36.** The SB alignment of glyphosate (**a**), malathion (**b**), methyl parathion (**c**), naled (dibrom) (**d**), parathion (**e**), and phosmet (**f**) into the *m*AChE active site. The enzyme ribbons are presented in blue, active site amino acids are depicted in white. For the clarity purpose, hydrogen atoms are omitted from presentation.

**Figure S37.** The SB alignment of TCVP (**a**), terbufos (**b**), methiocarb (**c**), methomyl (**d**), oxamyl (**e**), and DDT (**f**) into the *m*AChE active site. The enzyme ribbons are presented in blue, active site amino acids are depicted in white. For the clarity purpose, hydrogen atoms are omitted from presentation.

**Figure S38.** The SB alignment of 2,4-D (**a**), dicamba (**b**), DEET (**c**), and sulfoxaflor (**d**) into the *m*AChE active site. The enzyme ribbons are presented in blue, active site amino acids are depicted in white. For the clarity purpose, hydrogen atoms are omitted from presentation.

**Figure S39.** The SB alignment of azamethiphos (**a**), azinphos-methyl (**b**), chlorpyrifos (**c**), DDVP (**d**), diazinon (**e**), and fenitrothion (**f**) into the *h*AChE active site. The enzyme ribbons are presented in orange, active site amino acids are depicted in white. For the clarity purpose, hydrogen atoms are omitted from presentation.

**Figure S40.** The SB alignment of glyphosate (**a**), malathion (**b**), methyl parathion (**c**), naled (dibrom) (**d**), parathion (**e**), and phosmet (**f**) into the *h*AChE active site. The enzyme ribbons are presented in orange, active site amino acids are depicted in white. For the clarity purpose, hydrogen atoms are omitted from presentation.

**Figure S41.** The SB alignment of TCVP (**a**), terbufos (**b**), methiocarb (**c**), methomyl (**d**), oxamyl (**e**), and DDT (**f**) into the *h*AChE active site. The enzyme ribbons are presented in blue, active site amino acids are depicted in white. For the clarity purpose, hydrogen atoms are omitted from presentation.

**Figure S42.** The SB alignment of 2,4-D (**a**), dicamba (**b**), DEET (**c**), and sulfoxaflor (**d**) into the *h*AChE active site. The enzyme ribbons are presented in orange, active site amino acids are depicted in white. For the clarity purpose, hydrogen atoms are omitted from presentation.

**Figure S43.** The quantum chemical mechanism of *Homo sapiens* acetylcholinesterase inhibition by propazine. The extracted geometry of IS1 (**a**); TS1 (**b**); IS2 (**c**); TS2 (**d**).

**Figure S44.** The quantum chemical mechanism of *Homo sapiens* acetylcholinesterase inhibition by simazine. The extracted geometry of IS1 (**a**); TS1 (**b**); IS2 (**c**); TS2 (**d**).

**Figure S45.** Free energy profile for *Homo sapiens* acetylcholinesterase inhibition by propazine (**a**), and simazine (**b**) by means of B3LYP (6-31G\*) QM simulations.

**Table S1.** Training set pesticides chemical structures, conformational analysis, superposition of generated global minima using various force fields.

**Table S2.** Training set pesticides chemical structures, conformational analysis, superposition of generated global minima using various force fields.

**Table S3.** Training set pesticides chemical structures, conformational analysis, superposition of generated global minima using various force fields.

**Table S4.** Test set pesticides chemical structures and obtained global minima using MMFF as the best performing force field.

**Table S5.** Linear regression parameters for QSAR model 2 (acute toxicity against *Mus musculus*).

**Table S6.** External validation of QSAR model 2 (acute toxicity against *Mus musculus*).

**Table S7.** Linear regression parameters for QSAR model 4 (acute toxicity against *Homo sapiens*).

**Table S8.** External validation of QSAR model 4 (acute toxicity against *Homo sapiens*).

**Table S9.** Structure-based alignment assessment for wild type *Mus musculus* AChE inhibitors.

**Table S10.** Structure-based alignment assessment for wild type *Homo sapiens* AChE inhibitors.

**Table S11.** Binding free energies and individual energy terms of *Mus Musculus* (upper part) and *Homo sapiens* (lower part) AChE in complex with acetylcholine and various targeted pesticides inhibitors.

#### **Supplementary material references (SRs)**

```

sp|P22303|ACES_HUMAN MRPPQCLLHTPSLASPLLLLLLWLLGGGVGAEGREDAELLVTVRGGRLRGI RLKTPGGPV
sp|P21836|ACES_MOUSE MRPPWYPLHTPSLAFPLFLLLSLLGGGARAEGREDPQLLVRVRRGGQLRGI RLKAPGGPV
**** * : * * * * * : * * * * * : * * * * * : * * * * * : * * * * *

sp|P22303|ACES_HUMAN SAF LGIPFAEPPMGP RRFLPPEPKQPW SGVVDATTFQSVCYQYVDTLYPGFEGTEMWNP N
sp|P21836|ACES_MOUSE SAF LGIPFAEPPVGSRRFMPEPKRPW SGVLDATTFQNVCYQYVDTLYPGFEGTEMWNP N
***** : * * * * * : * * * * * : * * * * * : * * * * * : * * * * *

sp|P22303|ACES_HUMAN REL SEDCLYLNWVTPYPRPTSPTPVLVWIYGGGFYSGASSLDVYDGRFLVQAERTVLVSM
sp|P21836|ACES_MOUSE REL SEDCLYLNWVTPYPRPASPTPVLWIYGGGFYSGAASLDVYDGRFLA QVEGAVLVSM
***** : * * * * * : * * * * * : * * * * * : * * * * * : * * * * *

sp|P22303|ACES_HUMAN NYRVGAFGFLALPGSR EAPGNVGLLDQRLALQWQENVA AFGGDPTSVTLFGESAGAASV
sp|P21836|ACES_MOUSE NYRVGTFGFLALPGSR EAPGNVGLLDQRLALQWQENIA AFGGDPM SVTLFGESAGAASV
**** * : * * * * * : * * * * * : * * * * * : * * * * * : * * * * *

sp|P22303|ACES_HUMAN GMHLLSPPSRGLFHRAVLQSGAPNGPWATVGMGEARRRATQLAHLVGCPPGGTGGNDTEL
sp|P21836|ACES_MOUSE GMHILSLPSRSLFHRAVLQSGTPNGPWATVSAGEARRRATLLARLVGCPPGGAGGNDTEL
*** : * * * * * : * * * * * : * * * * * : * * * * * : * * * * *

sp|P22303|ACES_HUMAN VACLRT RPAQVLVNH EHWVLPQESVFRFSFVPVVDGDFLSDTPEALINAGDFHGLQVLVG
sp|P21836|ACES_MOUSE IACLRT RPAQDLVDH EHWVLPQESIFRFSFVPVVDGDFLSDTPEALINTGDFQDLQVLVG
: ***** * : * * * * * : * * * * * : * * * * * : * * * * * : * * * * *

sp|P22303|ACES_HUMAN VKDEGSYFLVYGAPGFSKDNESLISRAEFLAGVRVGPVQSDLA AEAVVLHYTDLHLPE
sp|P21836|ACES_MOUSE VKDEGSYFLVYGVGPFSGKDNESLISRAQFLAGVRI GVPQASDLA AEAVVLHYTDLHLPE
***** : * * * * * : * * * * * : * * * * * : * * * * * : * * * * *

sp|P22303|ACES_HUMAN DPARLREALSDVVDHNVCPVAQLAGRLAAQGARVYAYVFEHRASTLSWPLW MGVPHGY
sp|P21836|ACES_MOUSE DPTHLRDAMSAVVDHNVCPVAQLAGRLAAQGARVYAYIFEHRASTLTWPLW MGVPHGY
* : * * * * * : * * * * * : * * * * * : * * * * * : * * * * * : * * * * *

sp|P22303|ACES_HUMAN EIFEFIFGIPLDPSRNYTAE EKIFAQRLMRYWANFARTGDPNEPRDPKAPQWPPYTAGAQQ
sp|P21836|ACES_MOUSE EIFEFIFGLPLDPSLN YTT EERIFAQRLMKYWTNFARTGDPNDRDSKSPQWPPYTTAAQQ
***** : * * * * * : * * * * * : * * * * * : * * * * * : * * * * * : * * * * *

sp|P22303|ACES_HUMAN YVSLDLRPLEVRRGLRAQCAFWRFLPKLLSATDTLDEAERQWKAE FHRWSSYMVHWKN
sp|P21836|ACES_MOUSE YVSLNLKPLEVRRGLRAQTCAFWRFLPKLLSATDTLDEAERQWKAE FHRWSSYMVHWKN
**** * : * * * * * : * * * * * : * * * * * : * * * * * : * * * * *

sp|P22303|ACES_HUMAN QFDHYSKQDRCSDL
sp|P21836|ACES_MOUSE QFDHYSKQERCSDL
***** : *****

```

**Figure S1.** The sequence alignment between the *Mus musculus* and *Homo sapiens* AChE.

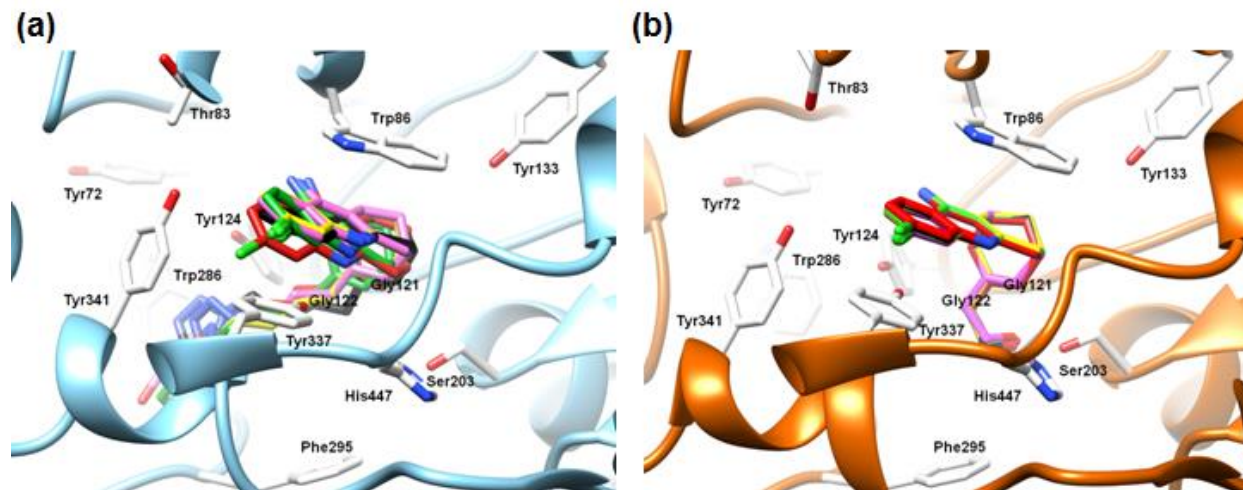

**Figure S2.** The Vina-based SB alignment assessment of **(a)** co-crystallized *m*AChE inhibitor (PDB ID: 4A16), EC pink, ECRD yellow, RCRD green, ECCD black, RCCD red, and **(b)** co-crystallized *h*AChE inhibitor (PDB ID: 4BDT), EC pink, ECRD yellow, RCRD green, ECCD black, RCCD red.

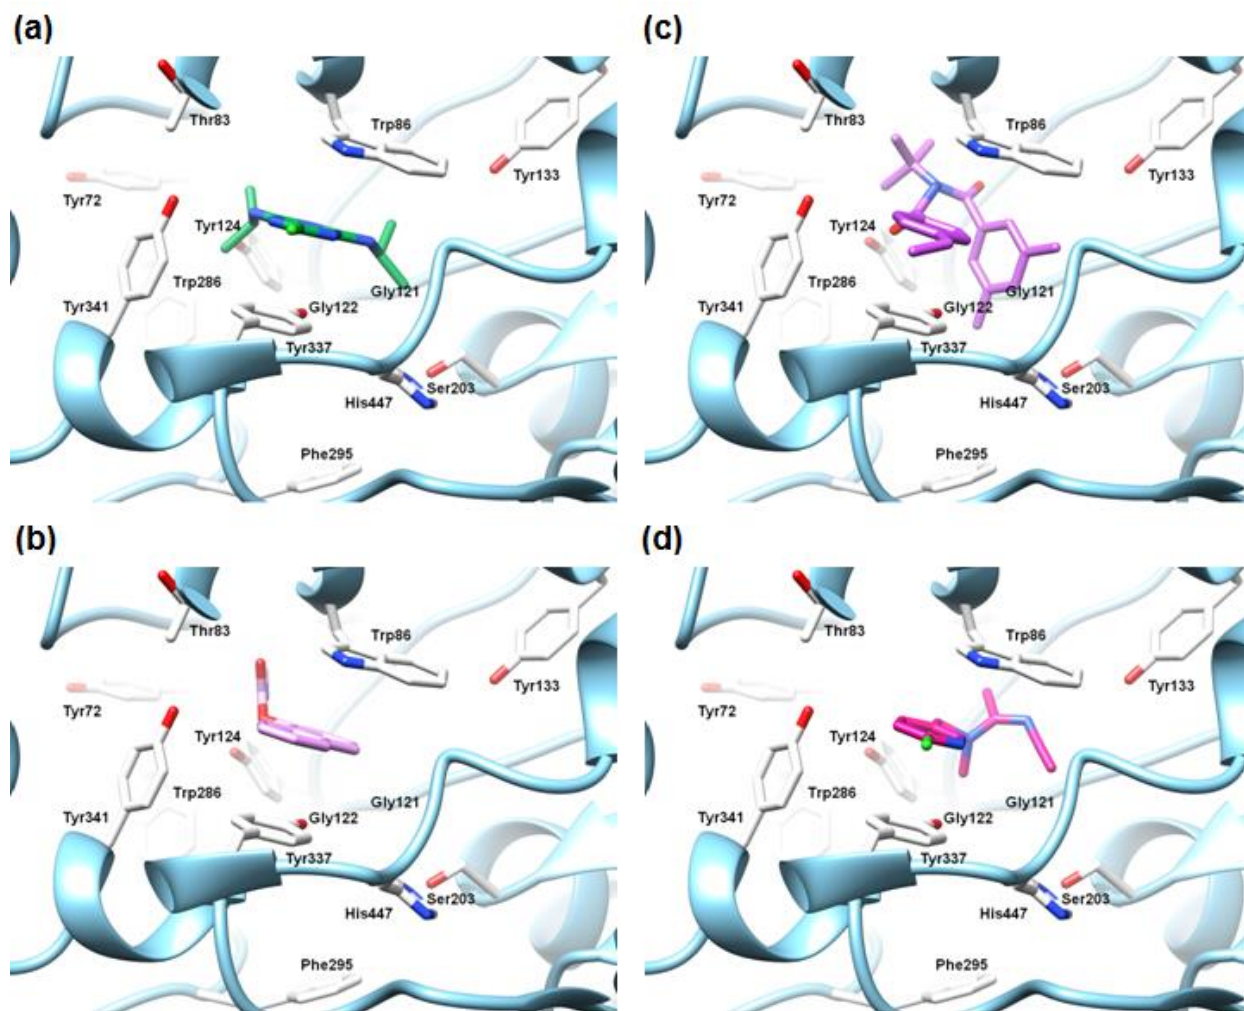

**Figure S3.** The The SB alignment of propazine (a), carbaryl (b), tebufenozide (c), and acetamiprid (d) into the *mAChE* active site. The The enzyme ribbons are presented in blue, active site amino acids are depicted in white. For the clarity purpose, hydrogen atoms are omitted from presentation.



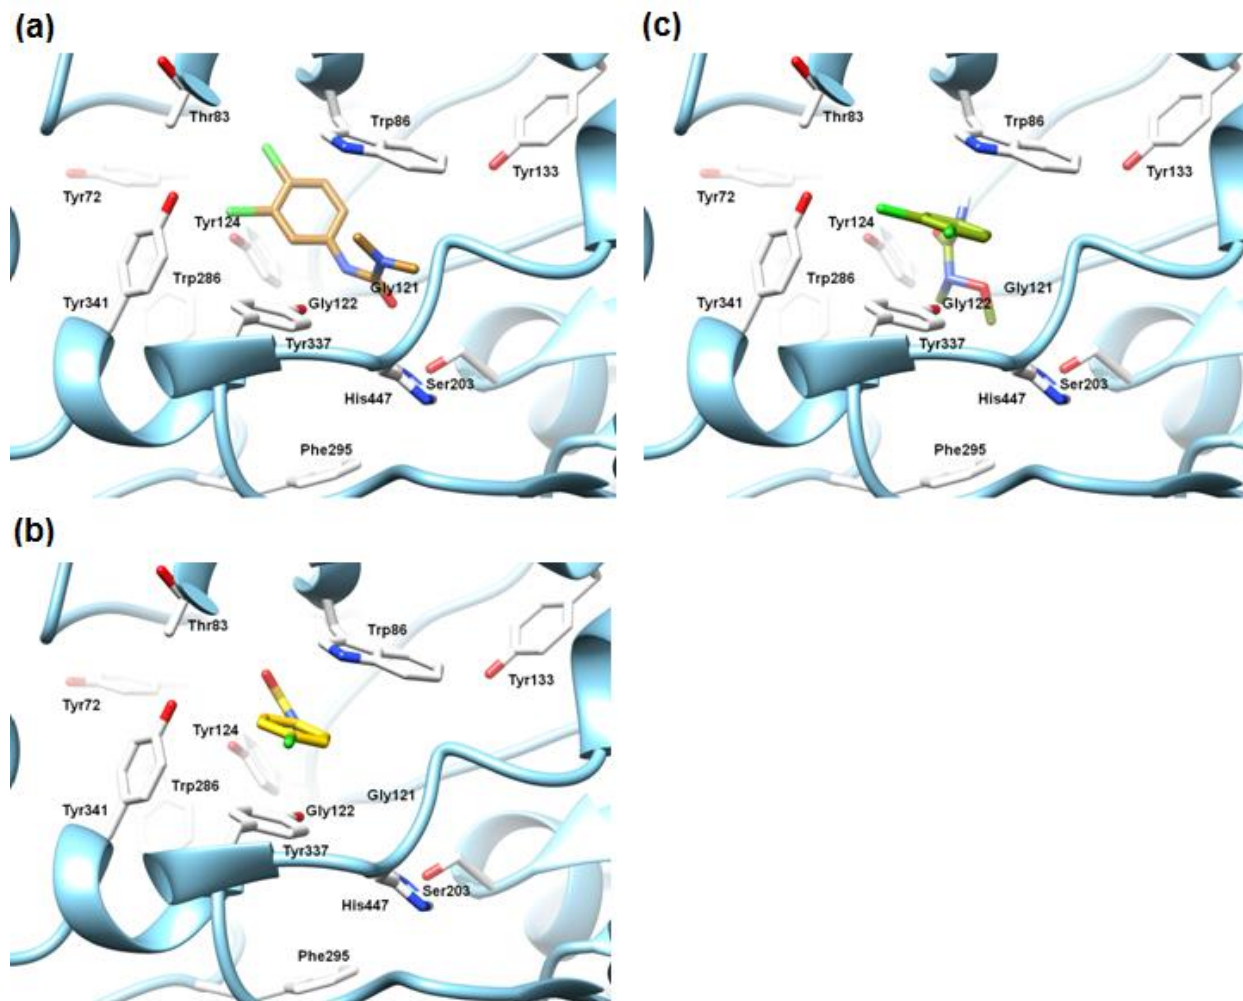

**Figure S4.** The SB alignment of diuron (a), monuron (b), and linuron (c) into the *mAChE* active site. The enzyme ribbons are presented in blue, active site amino acids are depicted in white. For the clarity purpose, hydrogen atoms are omitted from presentation.

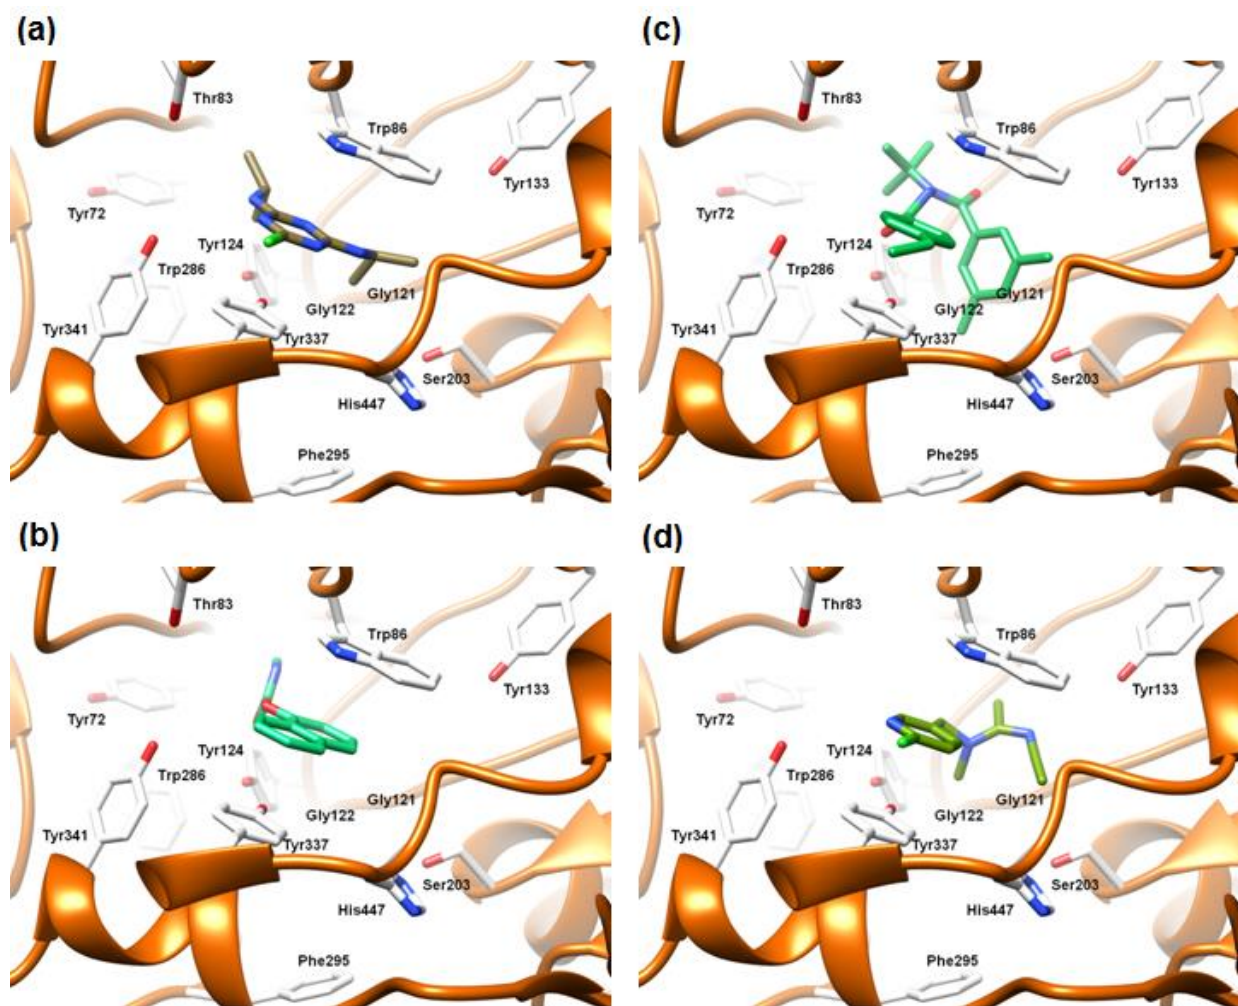

**Figure S5.** The SB alignment of propazine (a), carbaryl (b), tebufenozide (c), and acetamiprid (d) into the *hAChE* active site. The enzyme ribbons are presented in blue, active site amino acids are depicted in white. For the clarity purpose, hydrogen atoms are omitted from presentation.

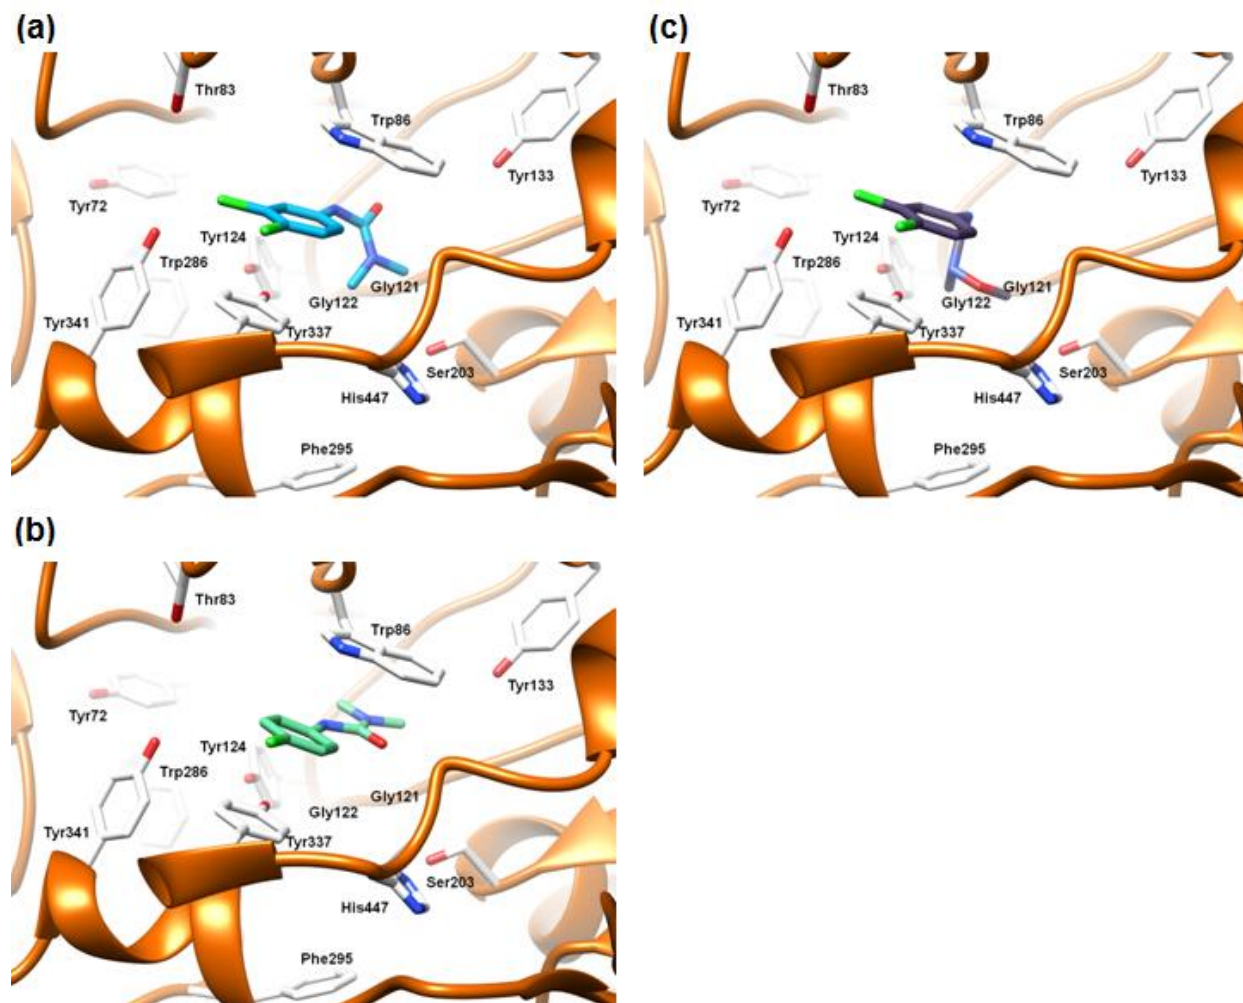

**Figure S6.** The The SB alignment of diuron (a), monuron (b), and linuron (c) into the *hAChE* active site. The The enzyme ribbons are presented in blue, active site amino acids are depicted in white. For the clarity purpose, hydrogen atoms are omitted from presentation.

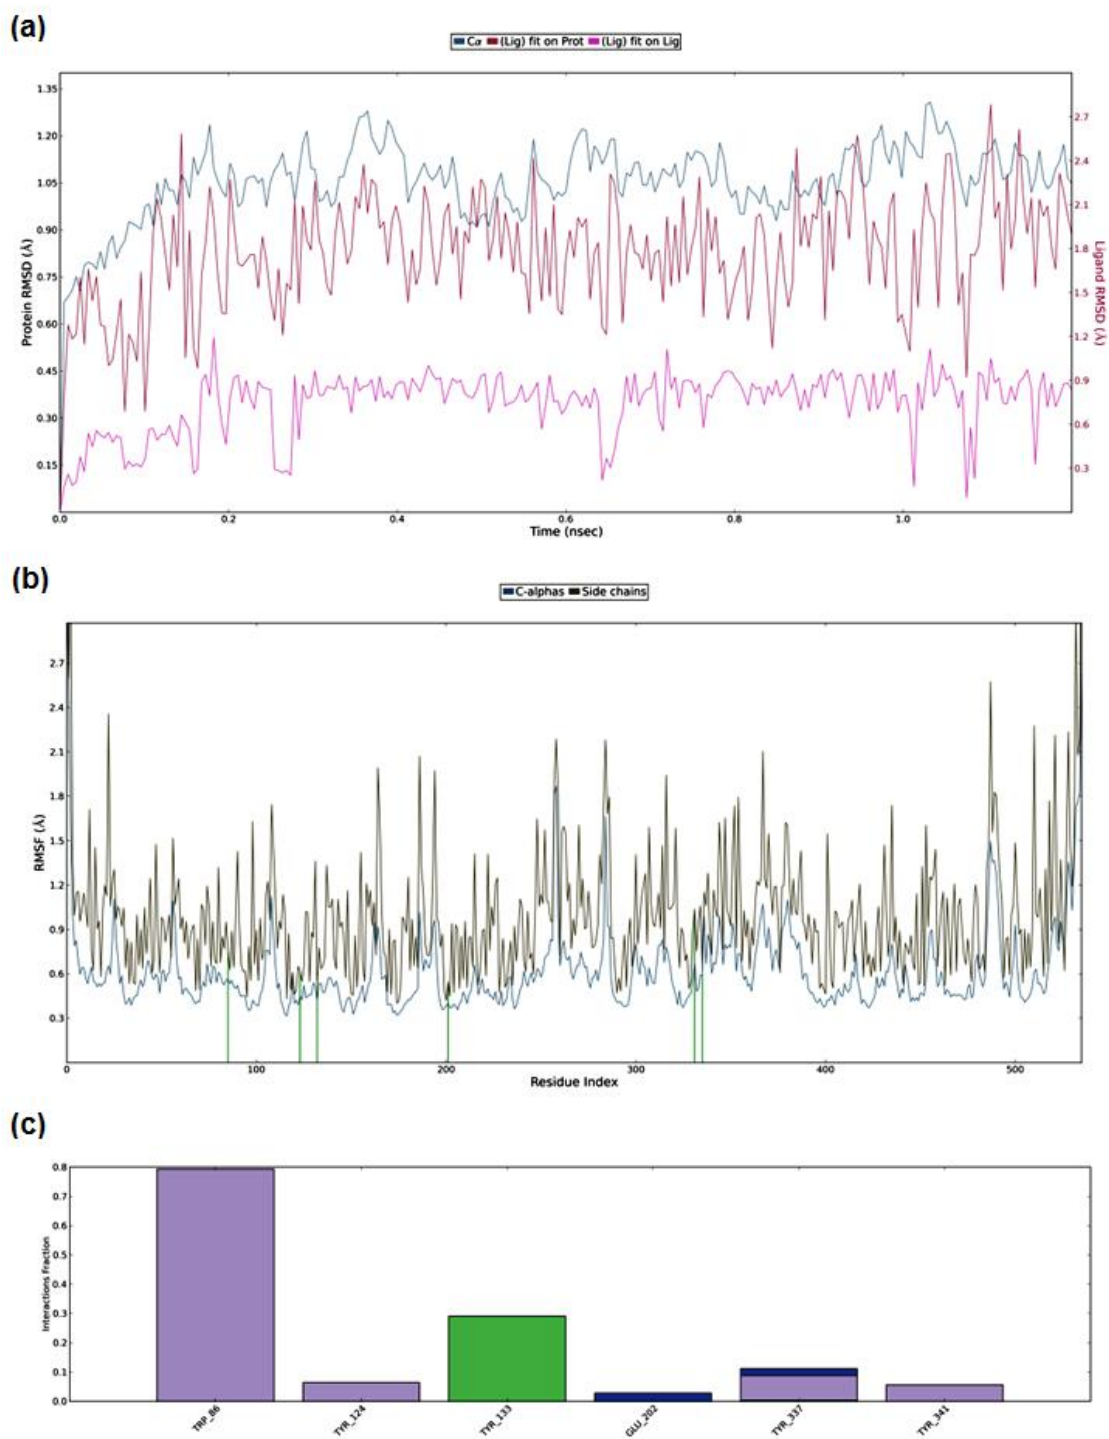

**Figure S7.** RMSDs **(a)**, RMSFs **(b)**, and Interaction diagrams **(c)** of *m*AChE in complex with ACh. The green bars present hydrogen bonds, the purple bars show hydrophobic interactions, the pink bars show ionic interaction, the blue bars present water bridges.

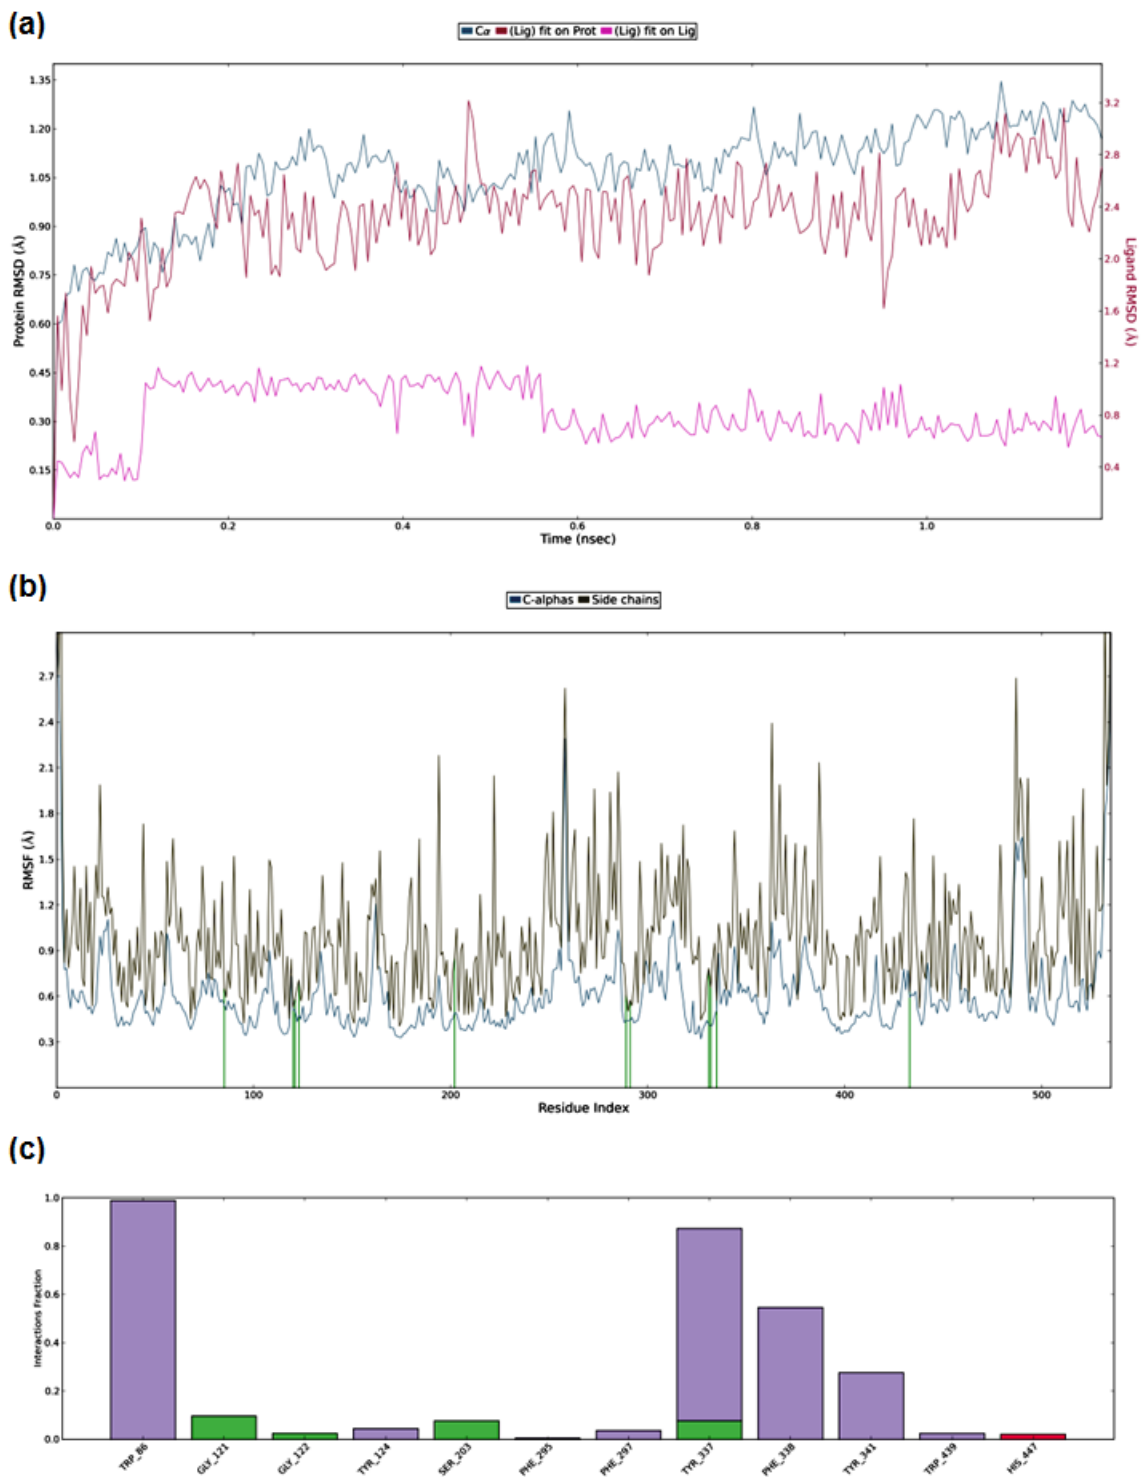

**Figure S8.** RMSDs (a), RMSFs (b), and Interaction diagrams (c) of *hAChE* in complex with ACh. The green bars present hydrogen bonds, the purple bars show hydrophobic interactions, the pink bars show ionic interaction, the blue bars present water bridges.

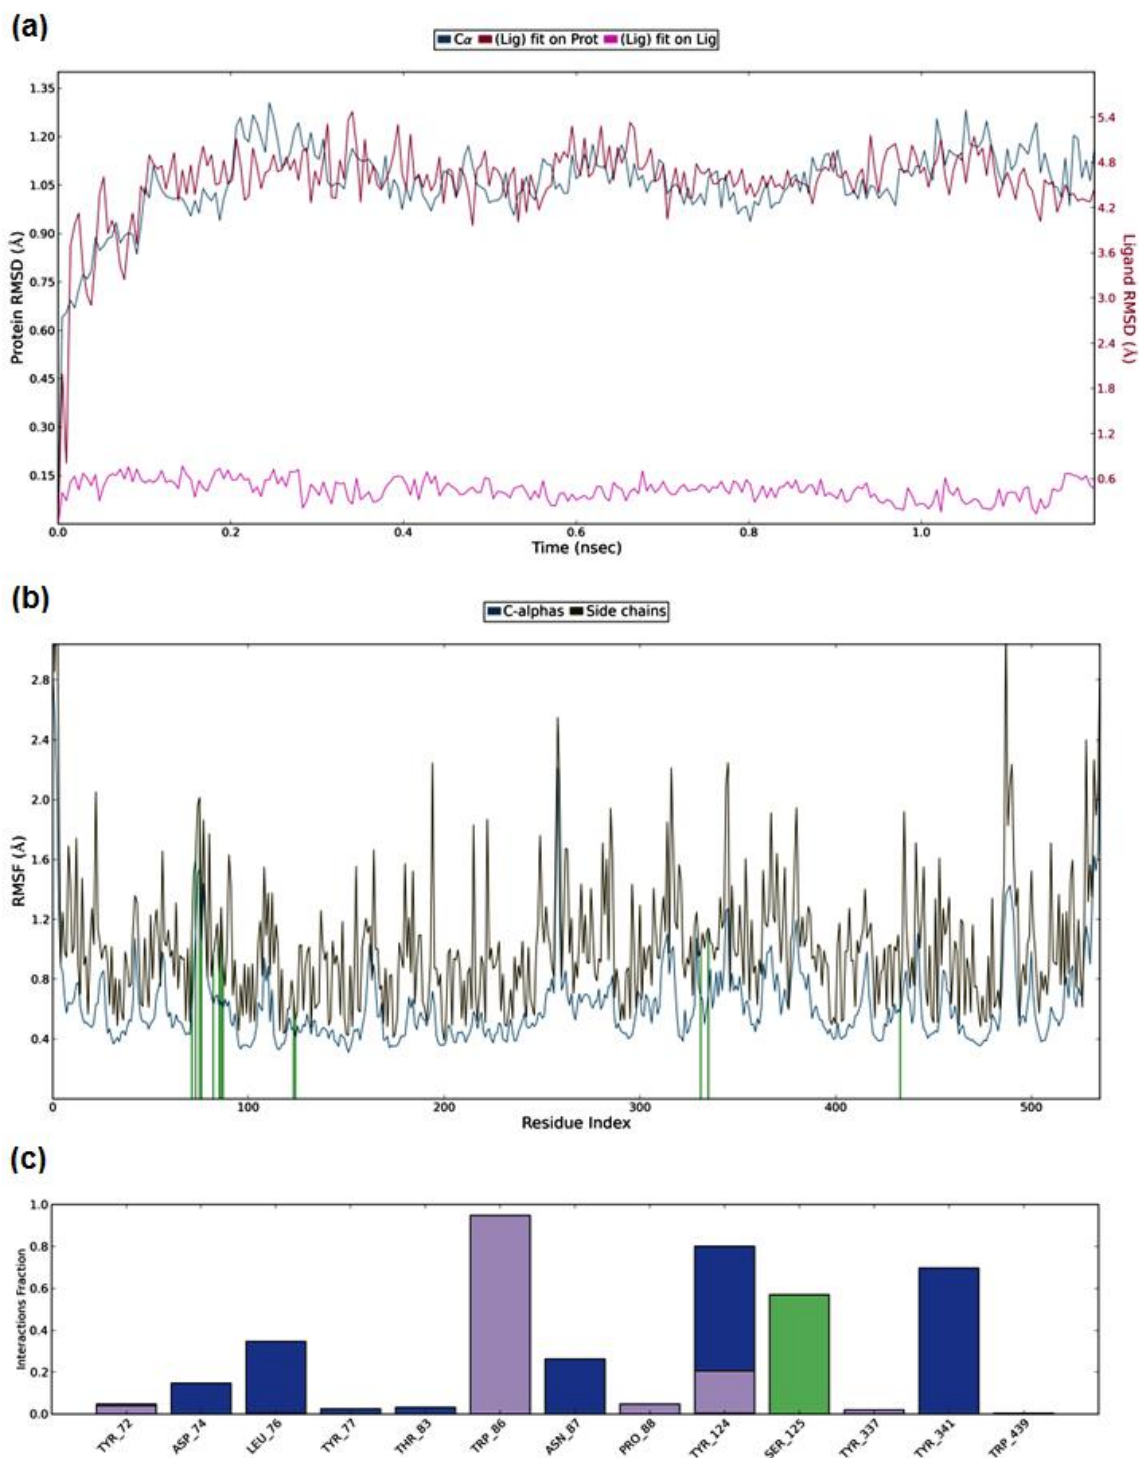

**Figure S9.** RMSDs (a), RMSFs (b), and Interaction diagrams (c) of *m*AChE in complex with atrazine. The green bars present hydrogen bonds, the purple bars show hydrophobic interactions, the pink bars show ionic interaction, the blue bars present water bridges.

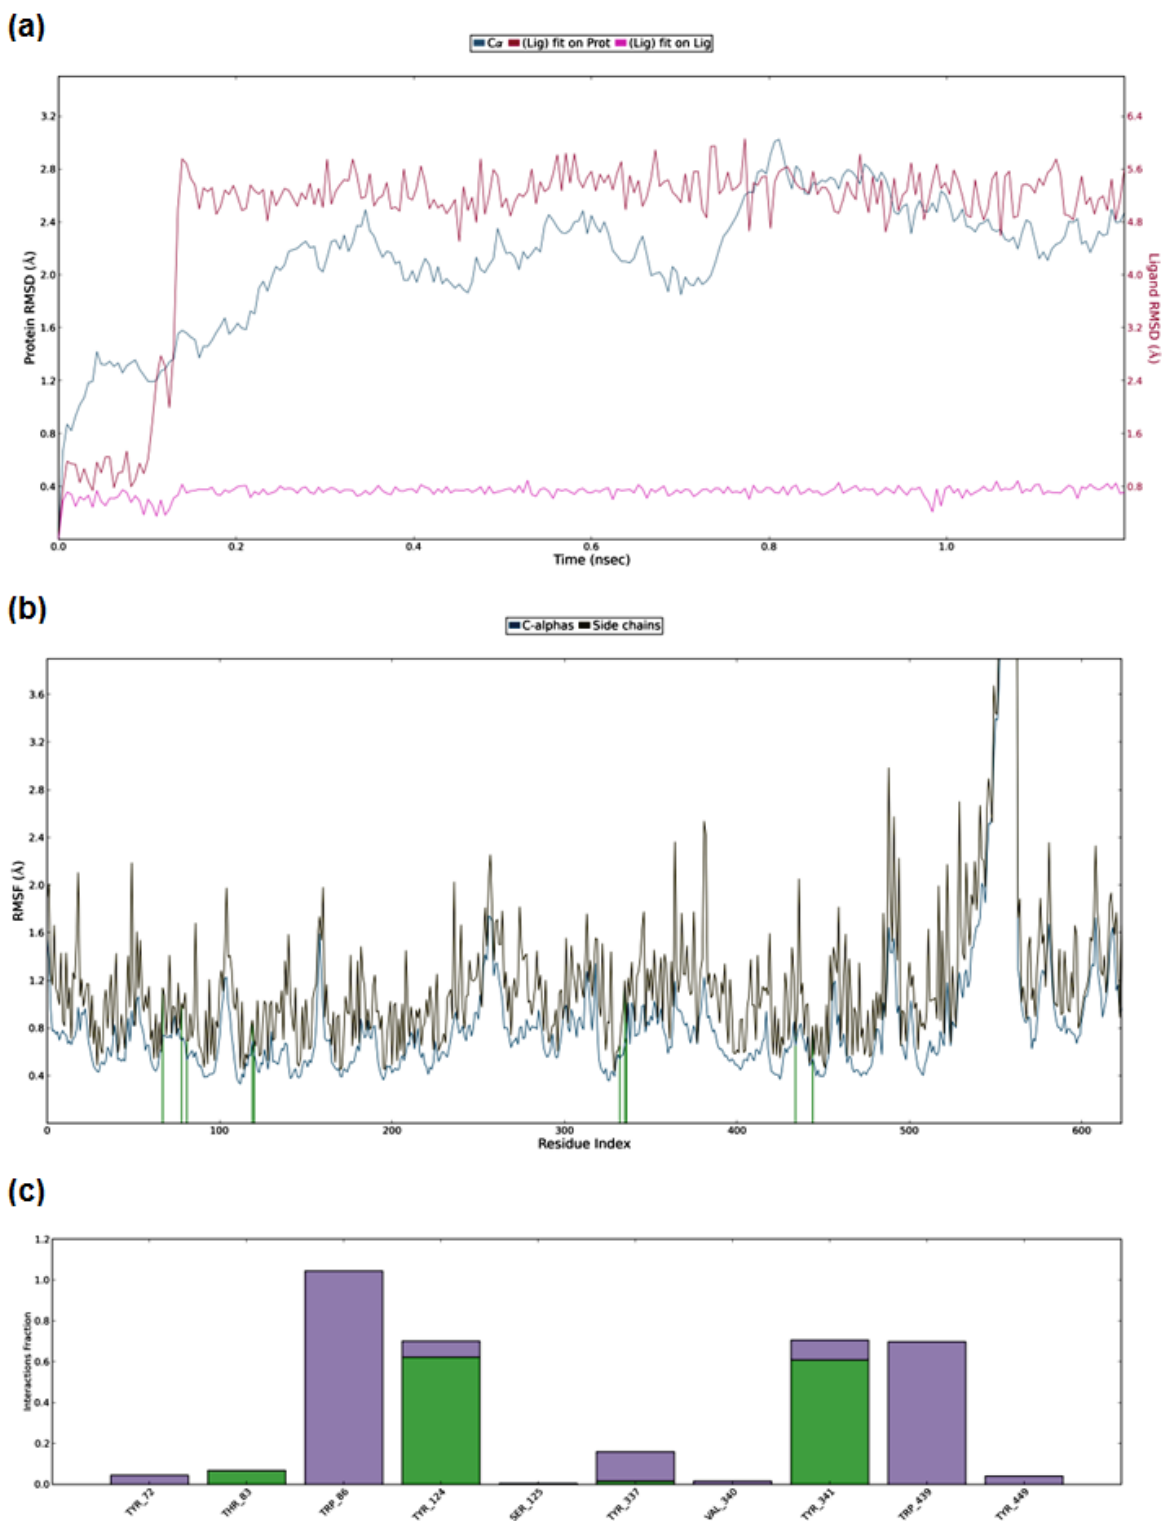

**Figure S10.** RMSDs **(a)**, RMSFs **(b)**, and Interaction diagrams **(c)** of *hAChE* in complex with atrazine. The green bars present hydrogen bonds, the purple bars show hydrophobic interactions, the pink bars show ionic interaction, the blue bars present water bridges.

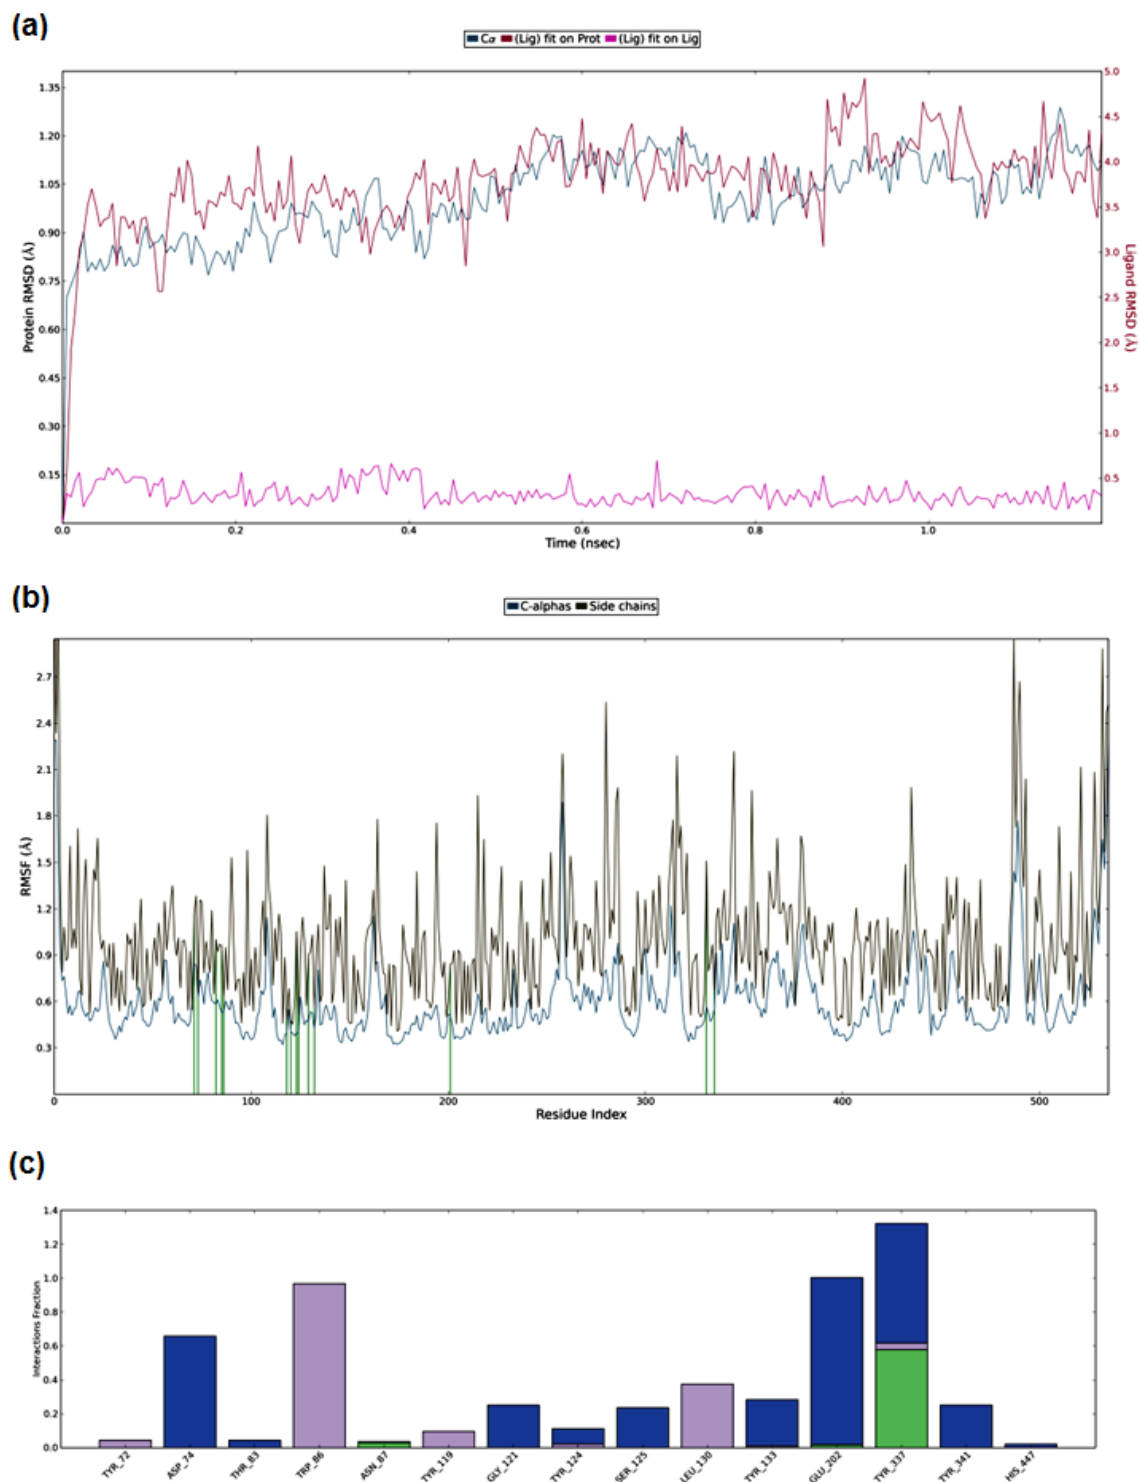

**Figure S11.** RMSDs **(a)**, RMSFs **(b)**, and Interaction diagrams **(c)** of *m*AChE in complex with propazine. The green bars present hydrogen bonds, the purple bars show hydrophobic interactions, the pink bars show ionic interaction, the blue bars present water bridges.



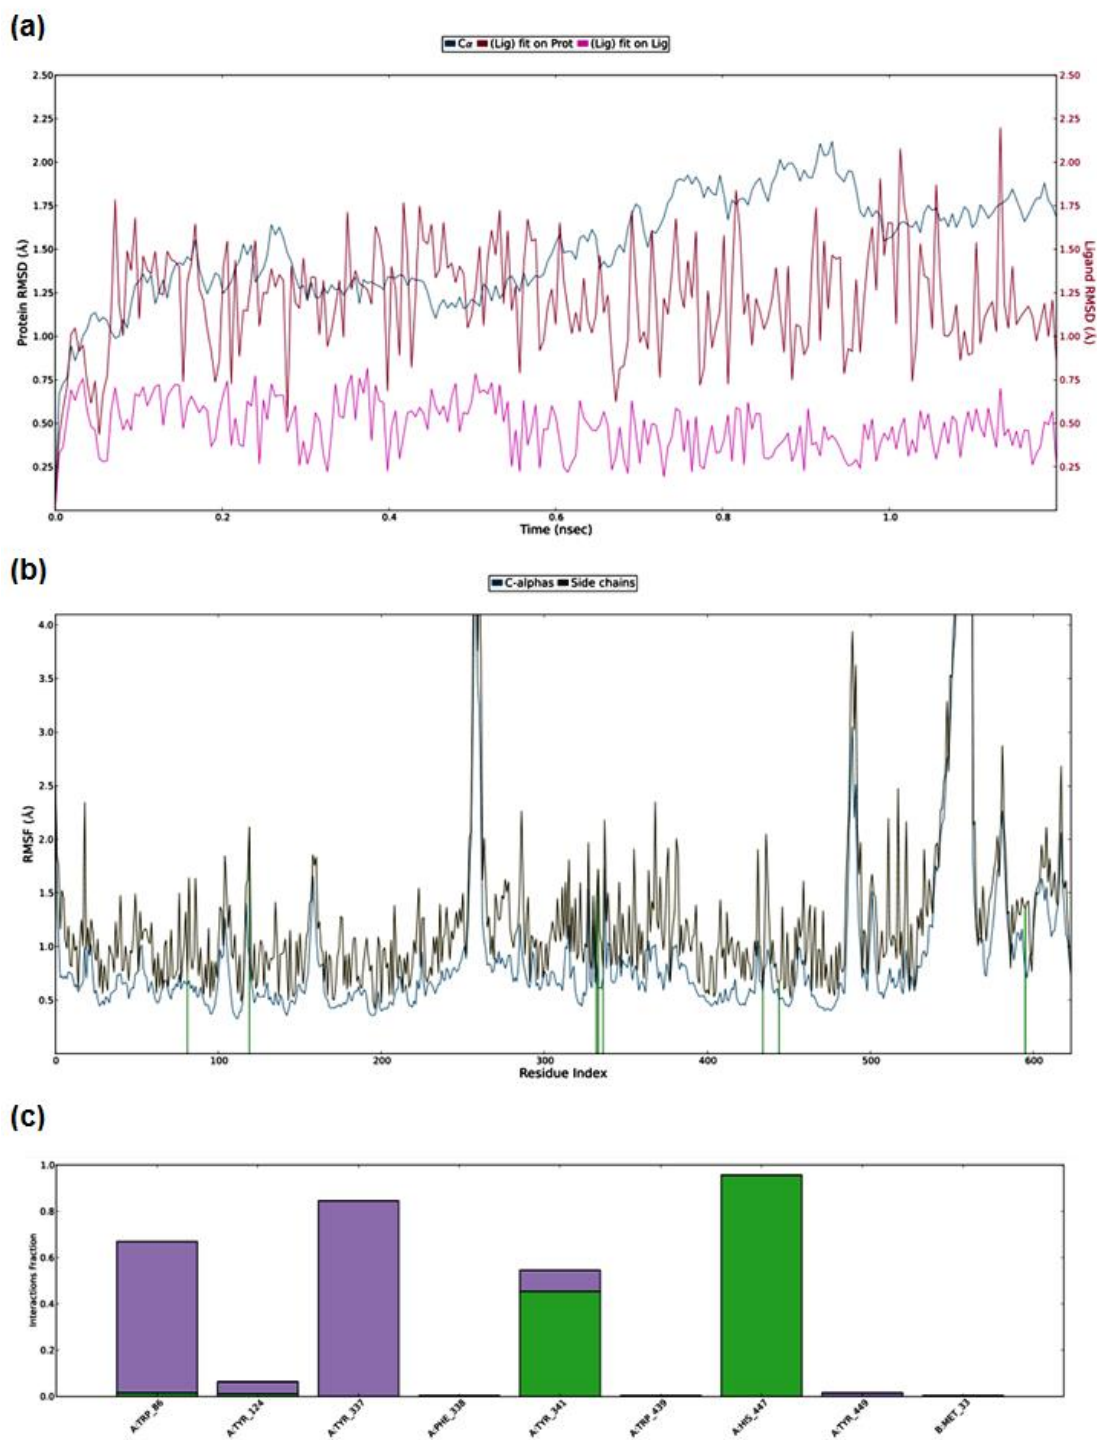

**Figure S12.** RMSDs (a), RMSFs (b), and Interaction diagrams (c) of *hAChE* in complex with propazine. The green bars present hydrogen bonds, the purple bars show hydrophobic interactions, the pink bars show ionic interaction, the blue bars present water bridges.

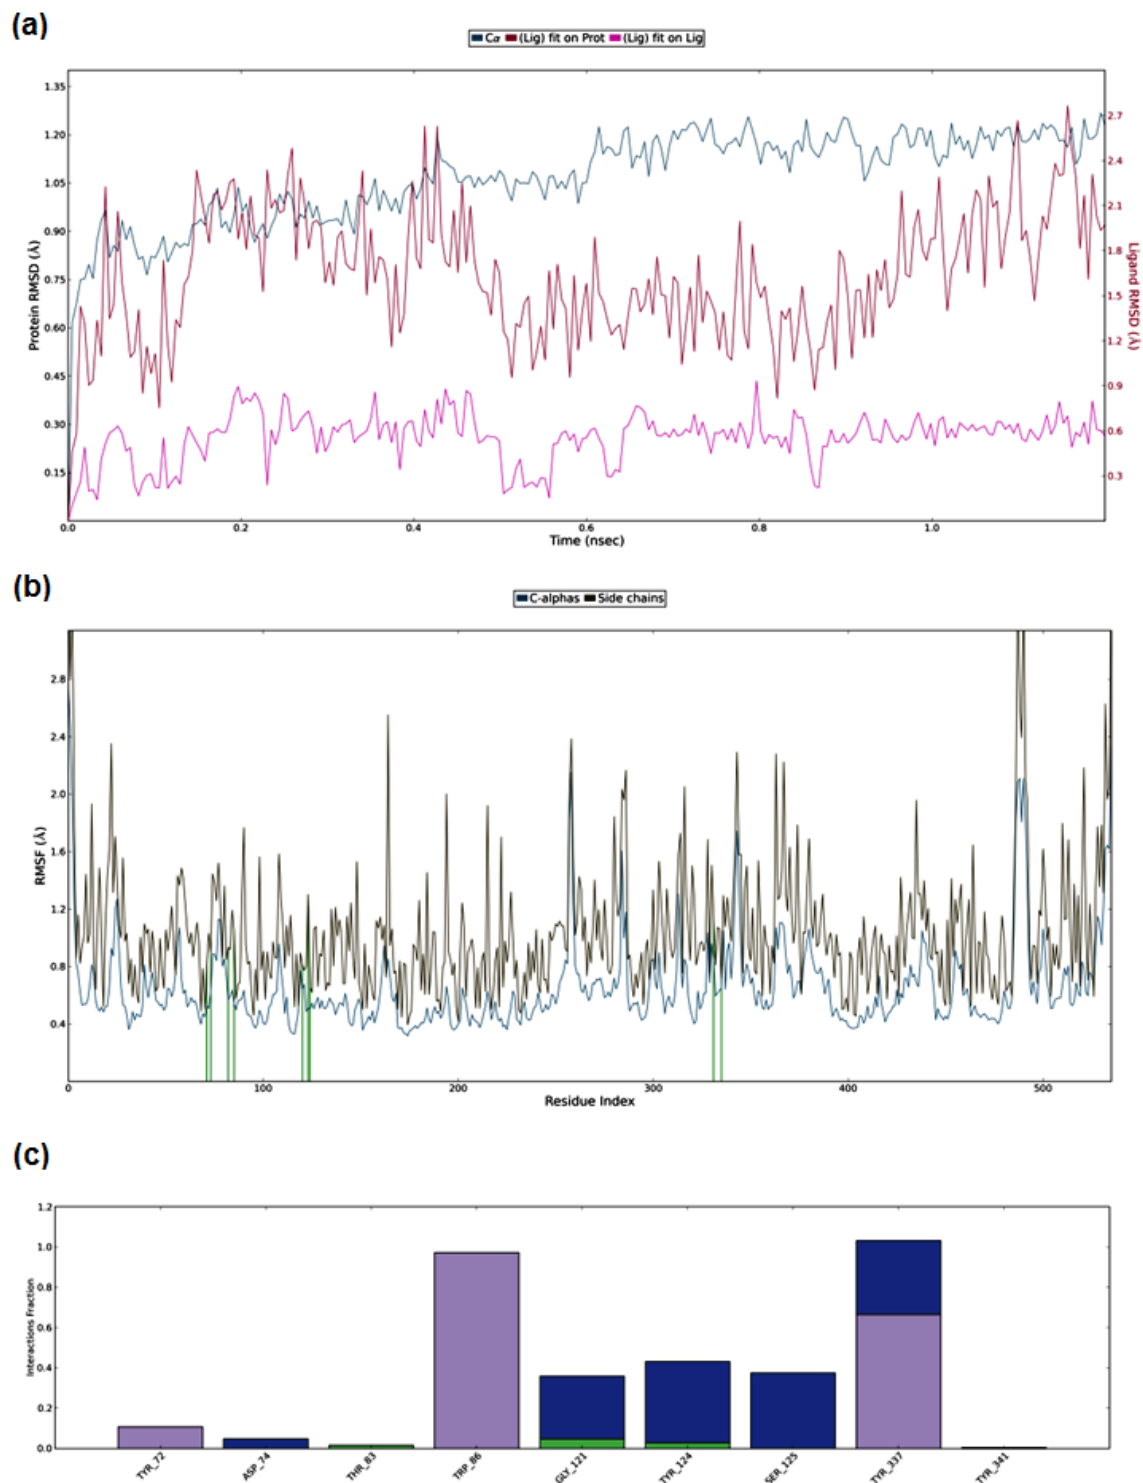

**Figure S13.** RMSDs (a), RMSFs (b), and Interaction diagrams (c) of *mAChE* in complex with simazine. The green bars present hydrogen bonds, the purple bars show hydrophobic interactions, the pink bars show ionic interaction, the blue bars present water bridges.

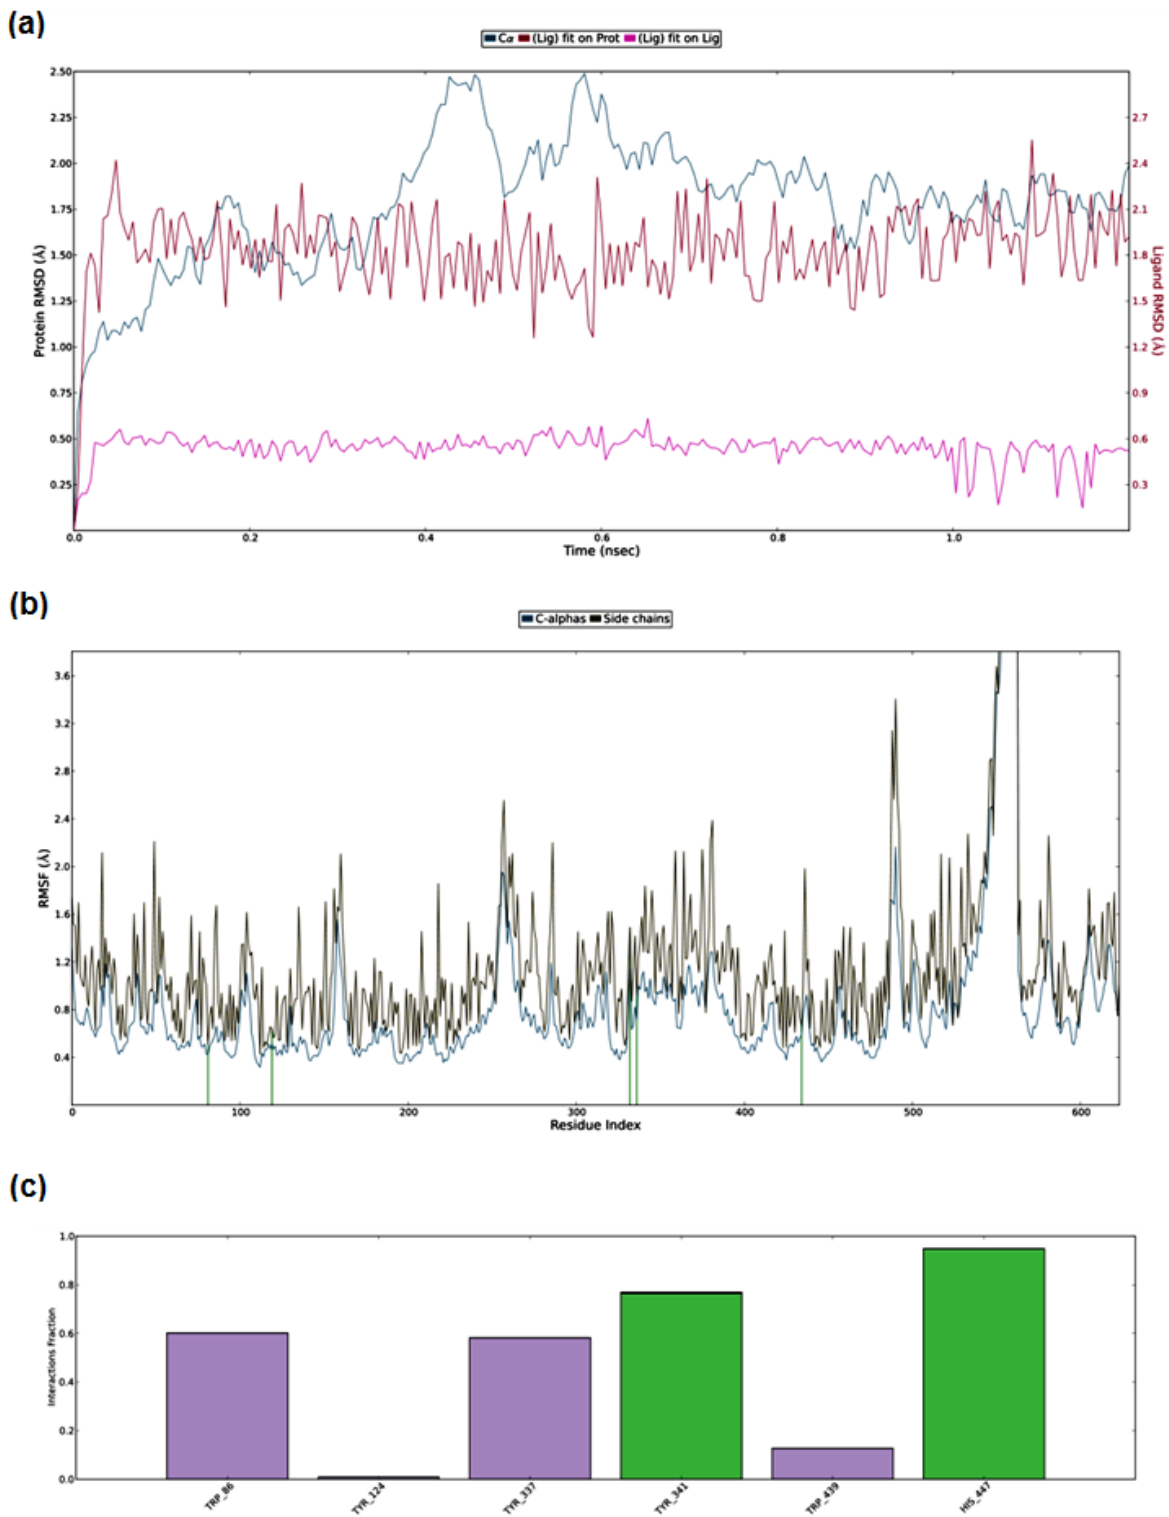

**Figure S14.** RMSDs (a), RMSFs (b), and Interaction diagrams (c) of *hAChE* in complex with simazine. The green bars present hydrogen bonds, the purple bars show hydrophobic interactions, the pink bars show ionic interaction, the blue bars present water bridges.

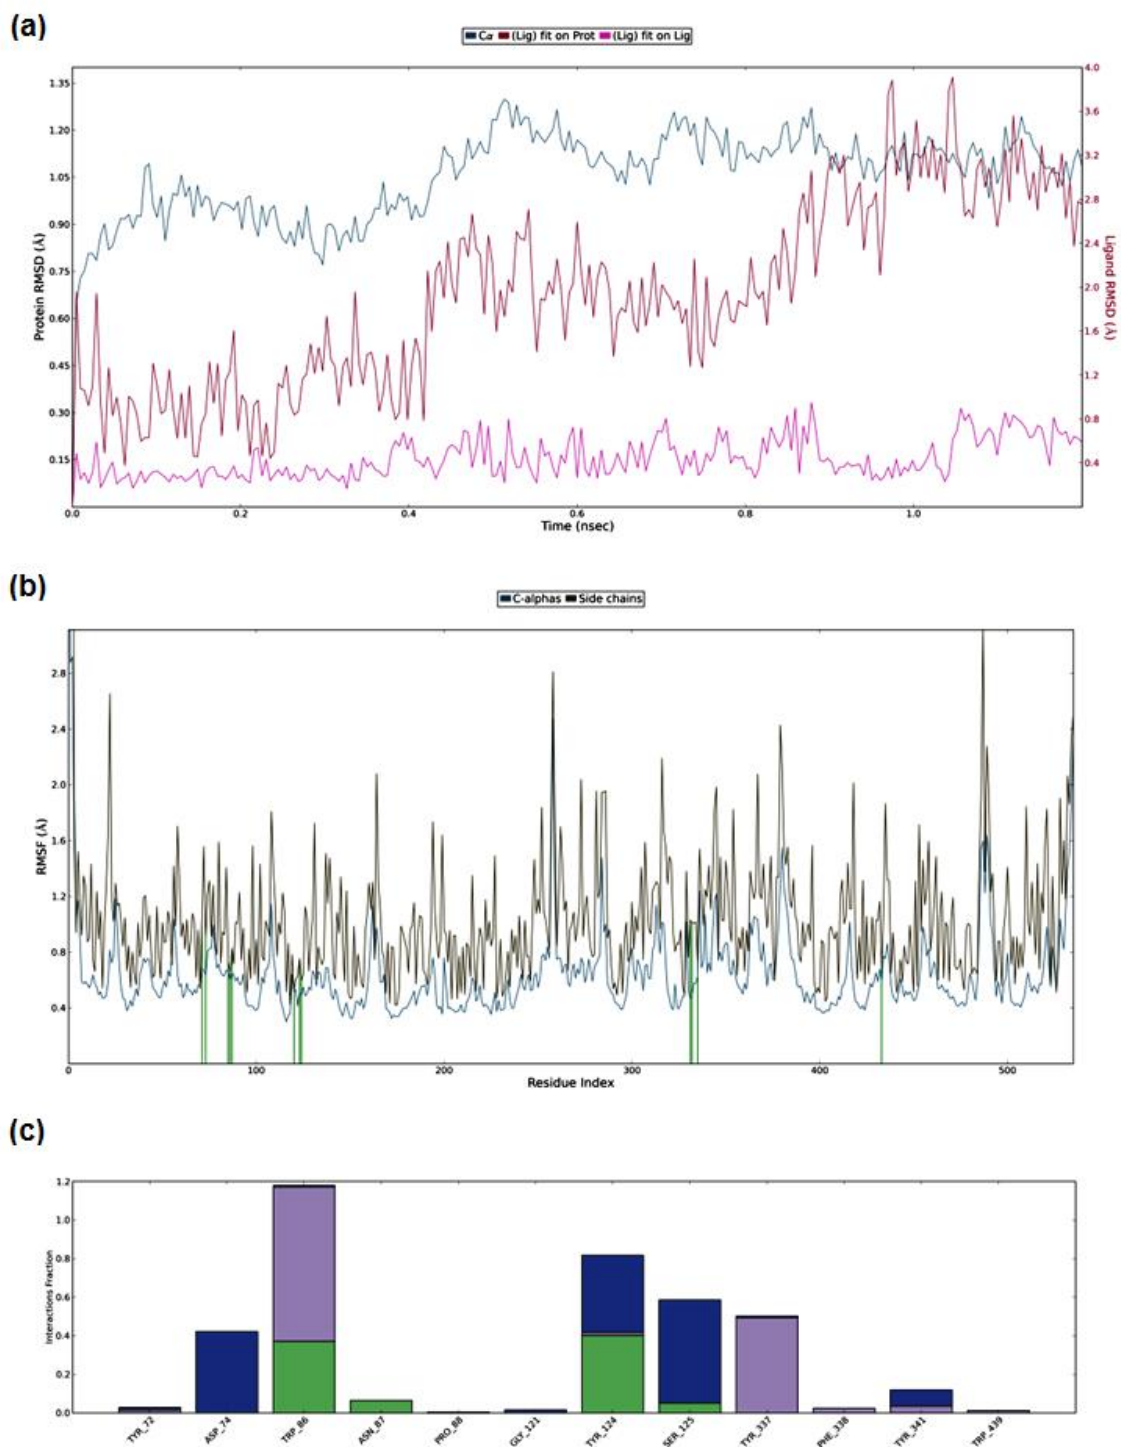

**Figure S15.** RMSDs (a), RMSFs (b), and Interaction diagrams (c) of *m*AChE in complex with carbofuran. The green bars present hydrogen bonds, the purple bars show hydrophobic interactions, the pink bars show ionic interaction, the blue bars present water bridges.

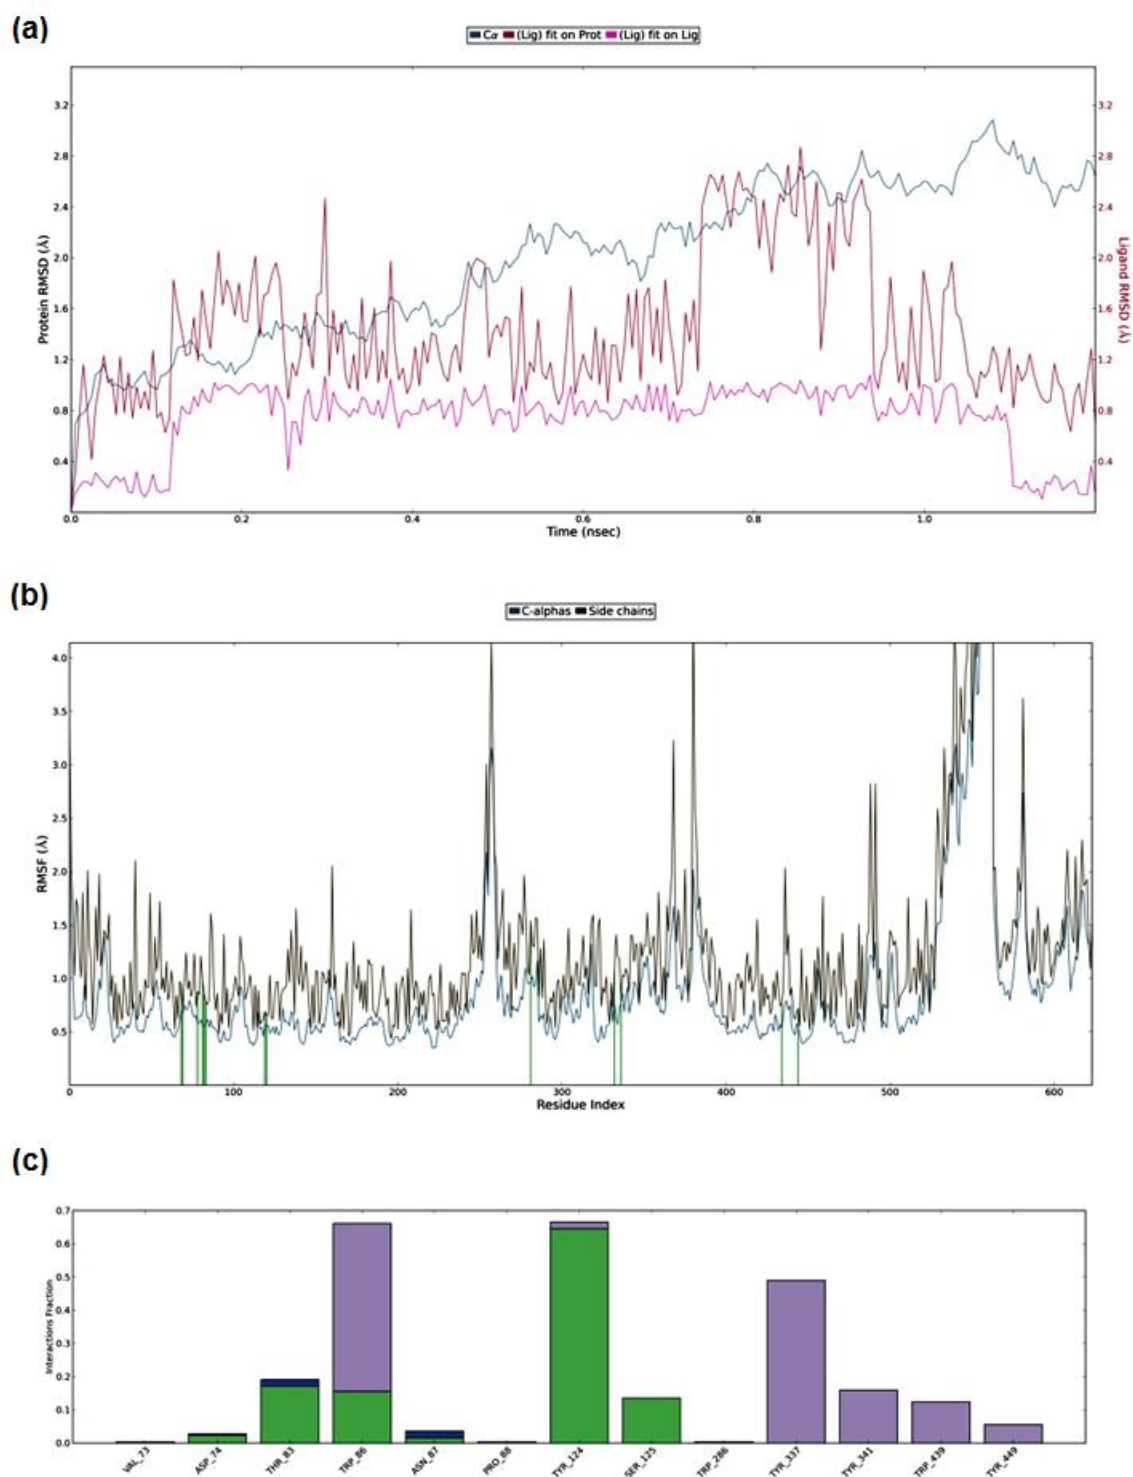

**Figure S16.** RMSDs (a), RMSFs (b), and Interaction diagrams (c) of *hAChE* in complex with carbofuran. The green bars present hydrogen bonds, the purple bars show hydrophobic interactions, the pink bars show ionic interaction, the blue bars present water bridges.

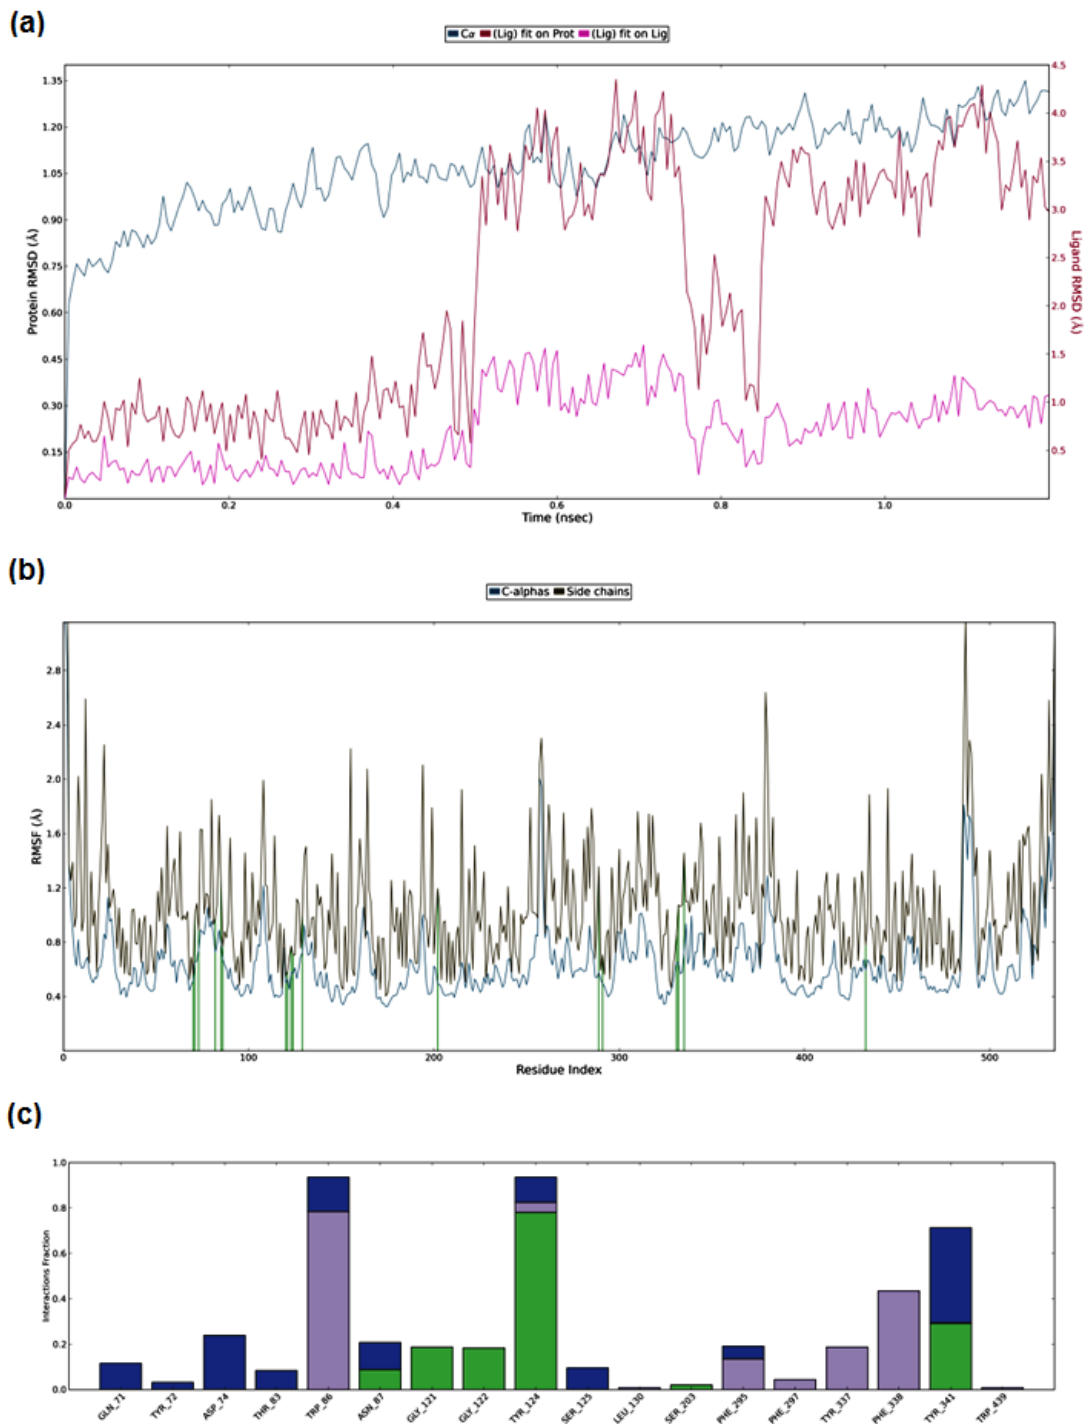

**Figure S17.** RMSDs (a), RMSFs (b), and Interaction diagrams (c) of *mAChE* in complex with monocrotophos. The green bars present hydrogen bonds, the purple bars show hydrophobic interactions, the pink bars show ionic interaction, the blue bars present water bridges.

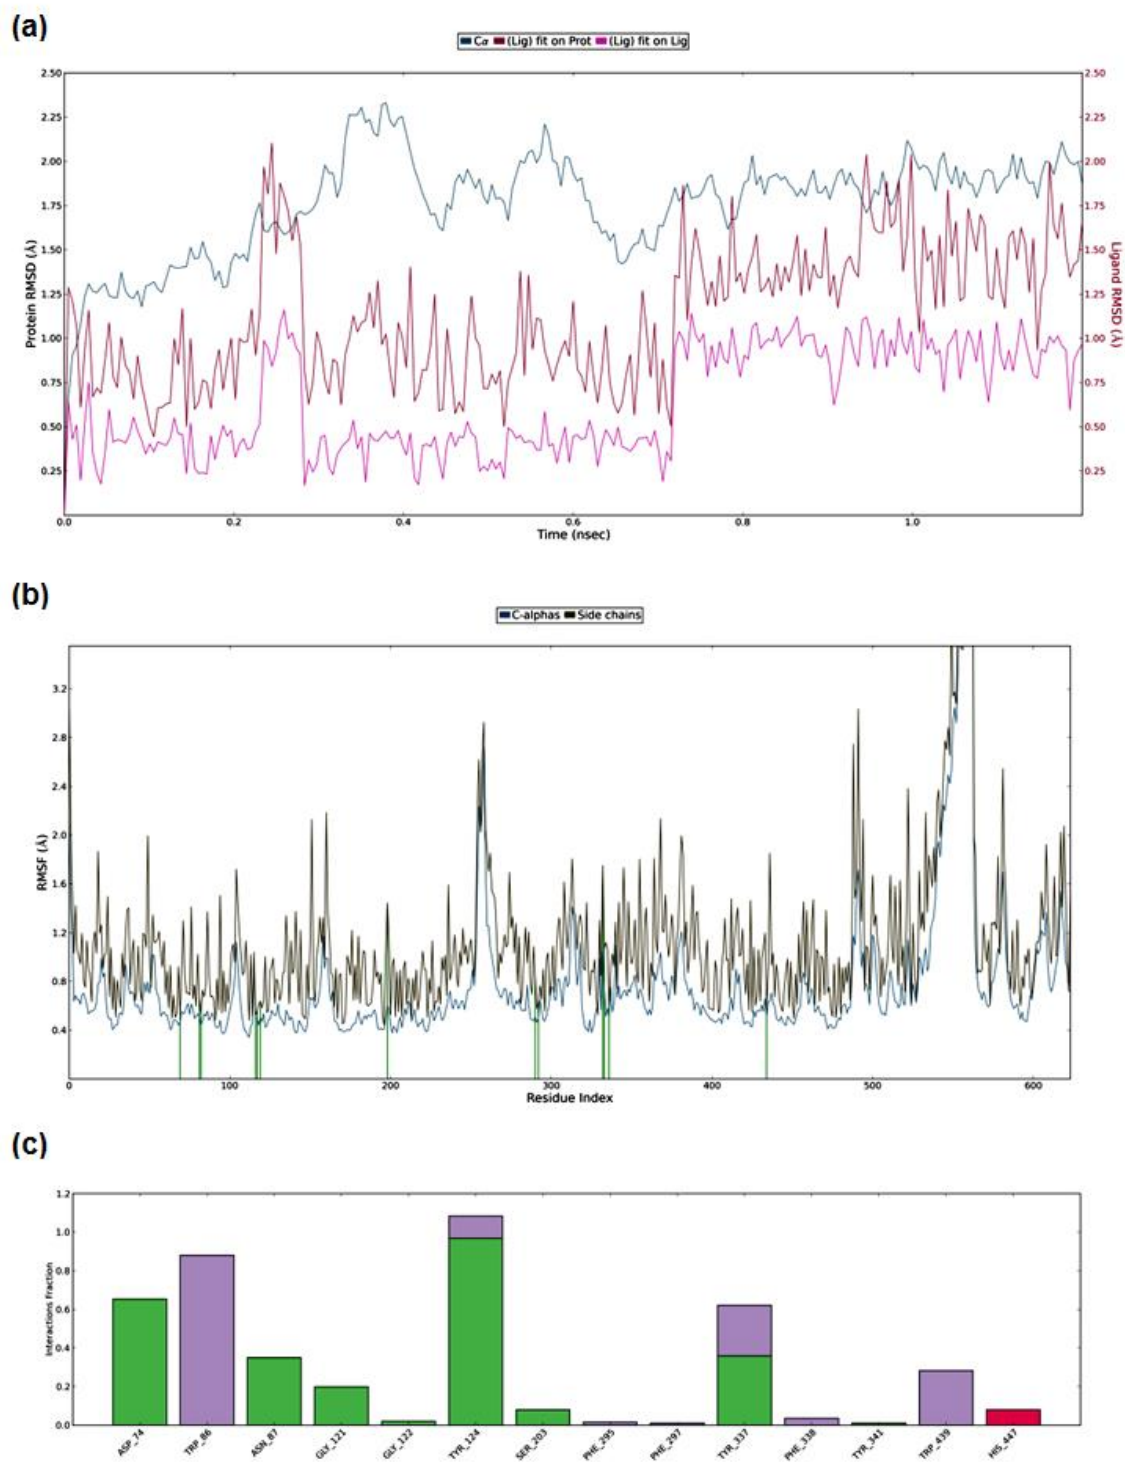

**Figure S18.** RMSDs (a), RMSFs (b), and Interaction diagrams (c) of *hAChE* in complex with monocrotophos. The green bars present hydrogen bonds, the purple bars show hydrophobic interactions, the pink bars show ionic interaction, the blue bars present water bridges.

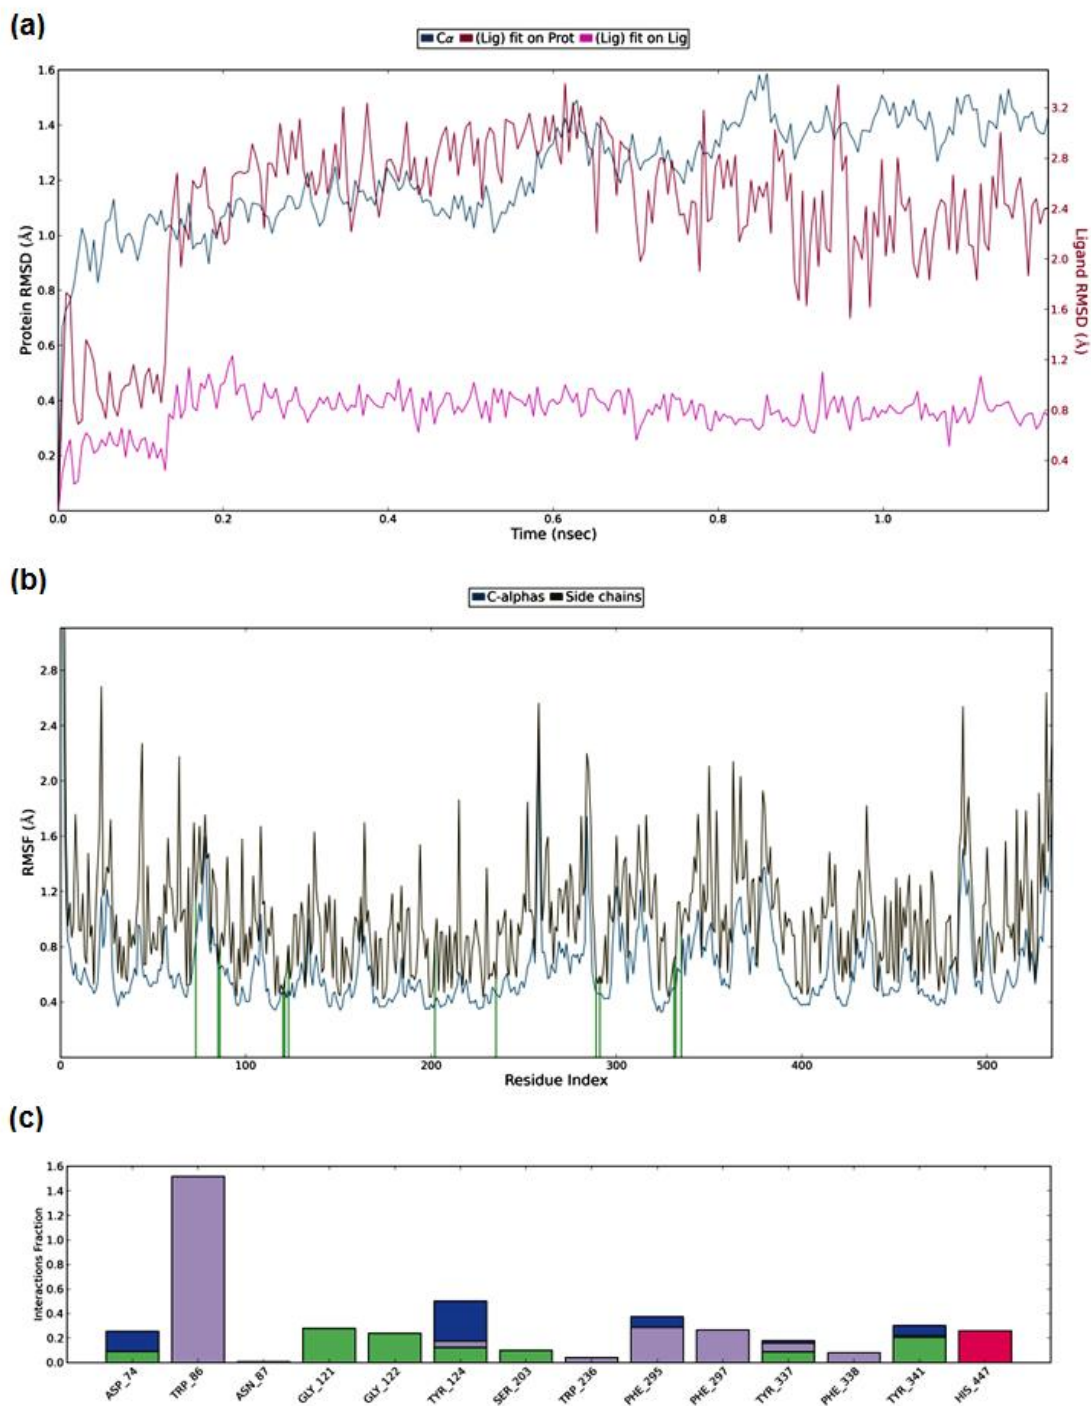

**Figure S19.** RMSDs (a), RMSFs (b), and Interaction diagrams (c) of *mAChE* in complex with dimethoate. The green bars present hydrogen bonds, the purple bars show hydrophobic interactions, the pink bars show ionic interaction, the blue bars present water bridges.



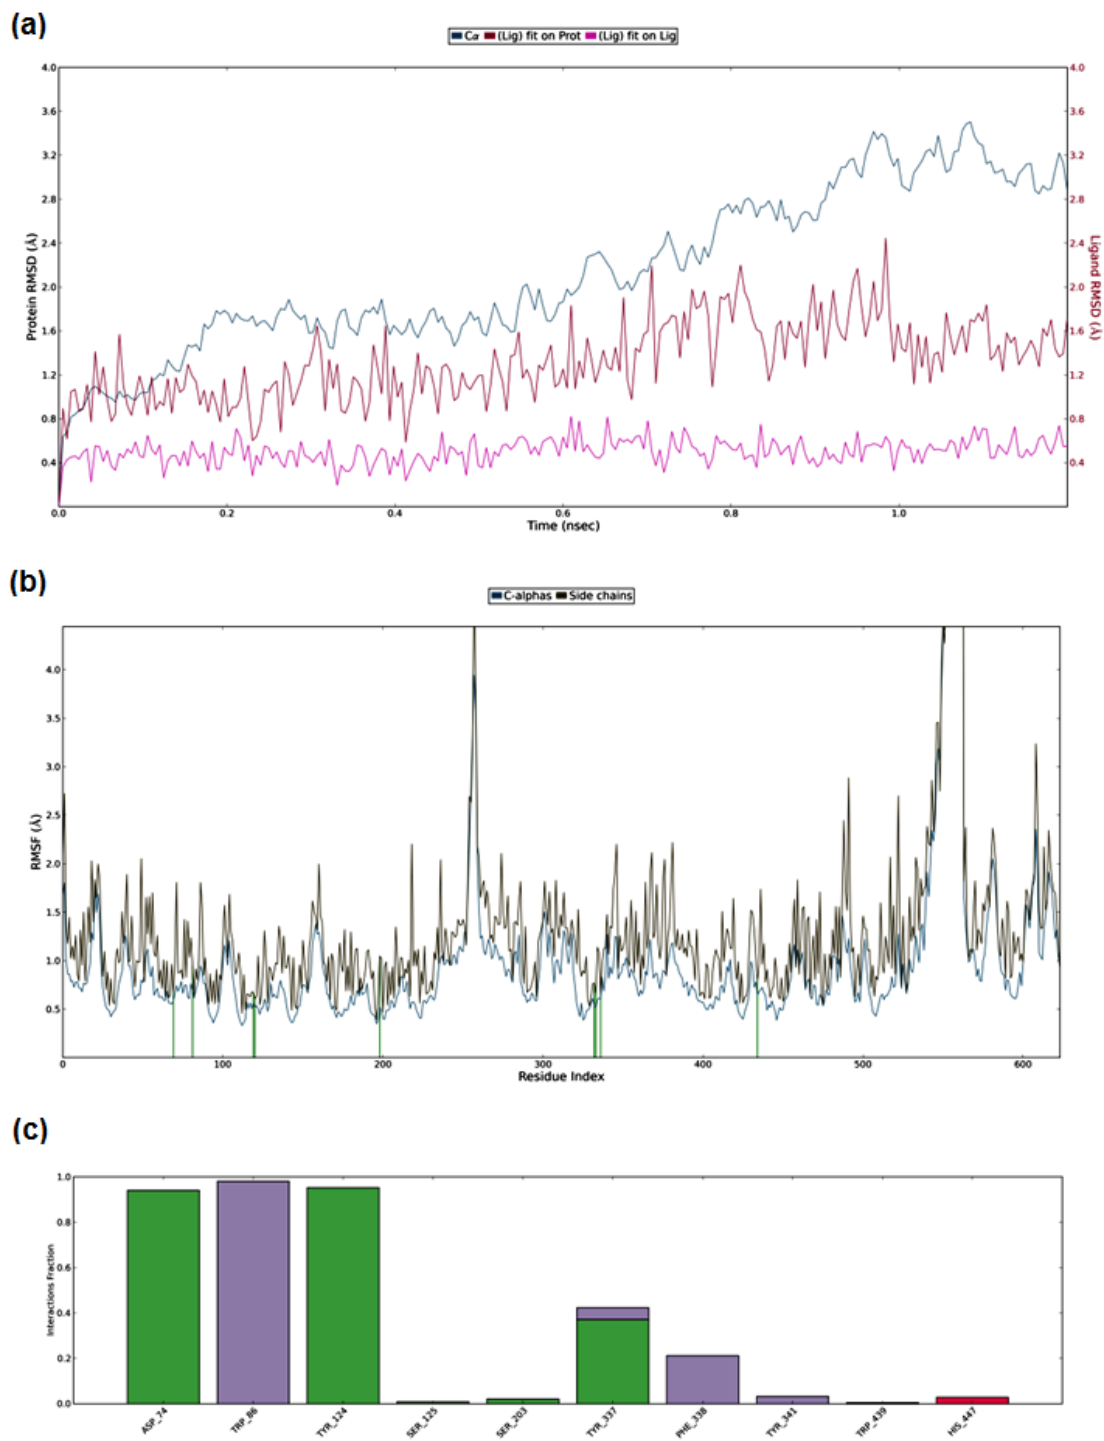

**Figure S20.** RMSDs (a), RMSFs (b), and Interaction diagrams (c) of *hAChE* in complex with dimethoate. The green bars present hydrogen bonds, the purple bars show hydrophobic interactions, the pink bars show ionic interaction, the blue bars present water bridges.

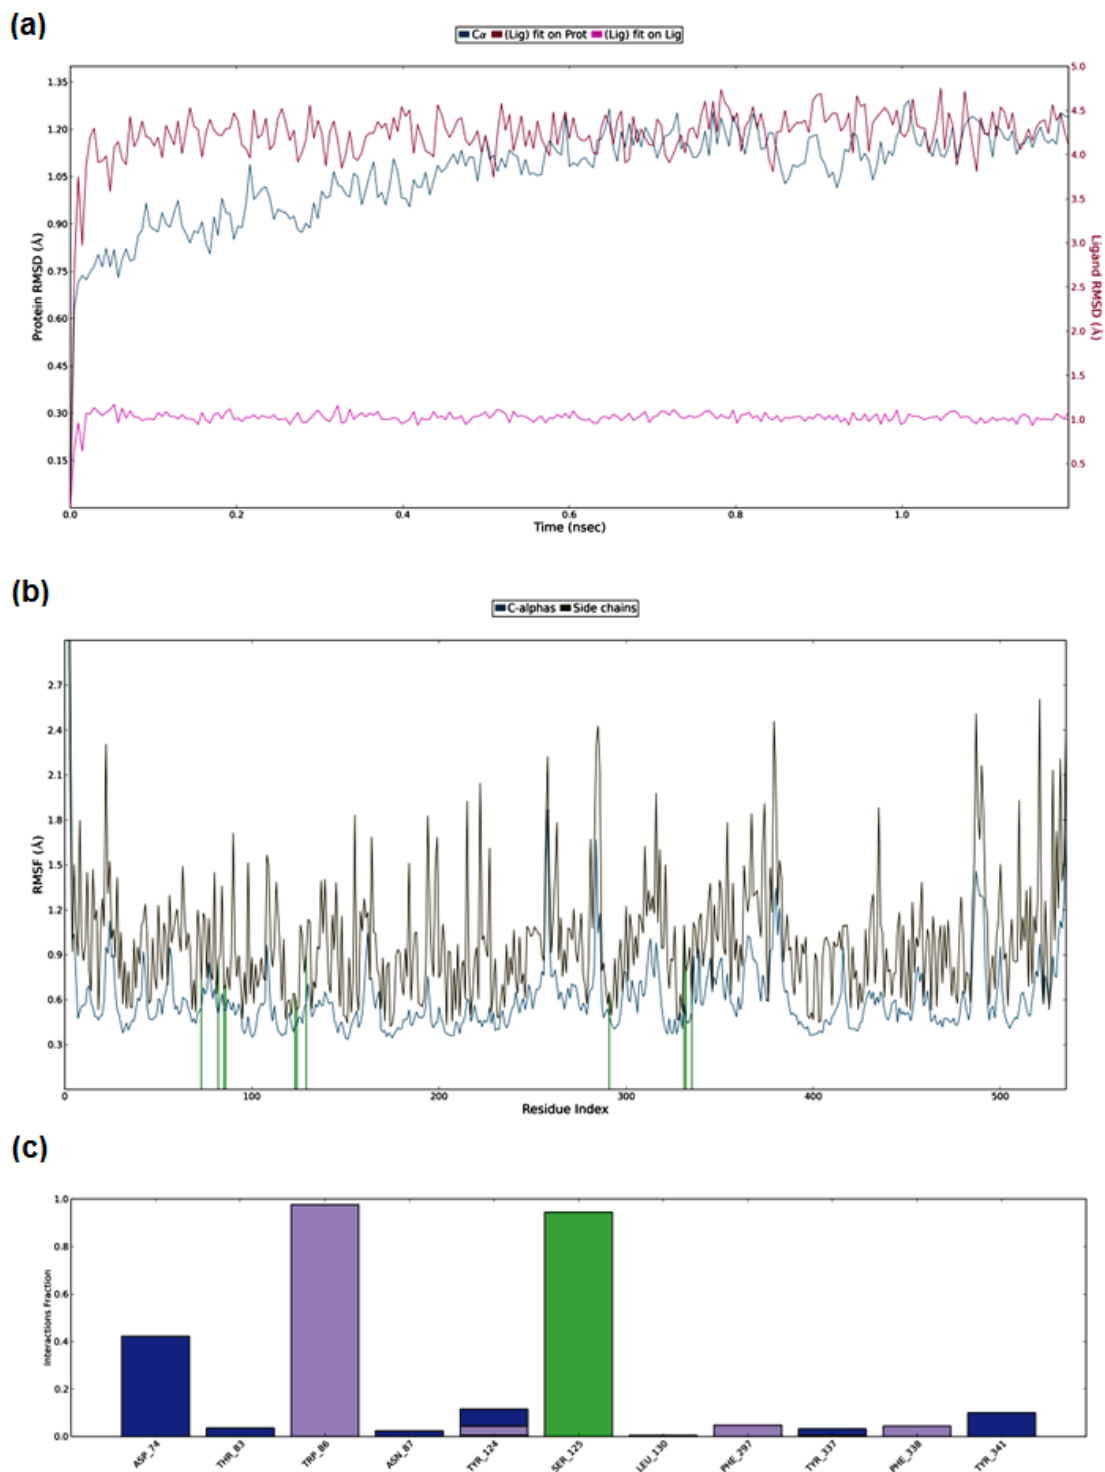

**Figure S21.** RMSDs **(a)**, RMSFs **(b)**, and Interaction diagrams **(c)** of *m*AChE in complex with carbaryl. The green bars present hydrogen bonds, the purple bars show hydrophobic interactions, the pink bars show ionic interaction, the blue bars present water bridges.

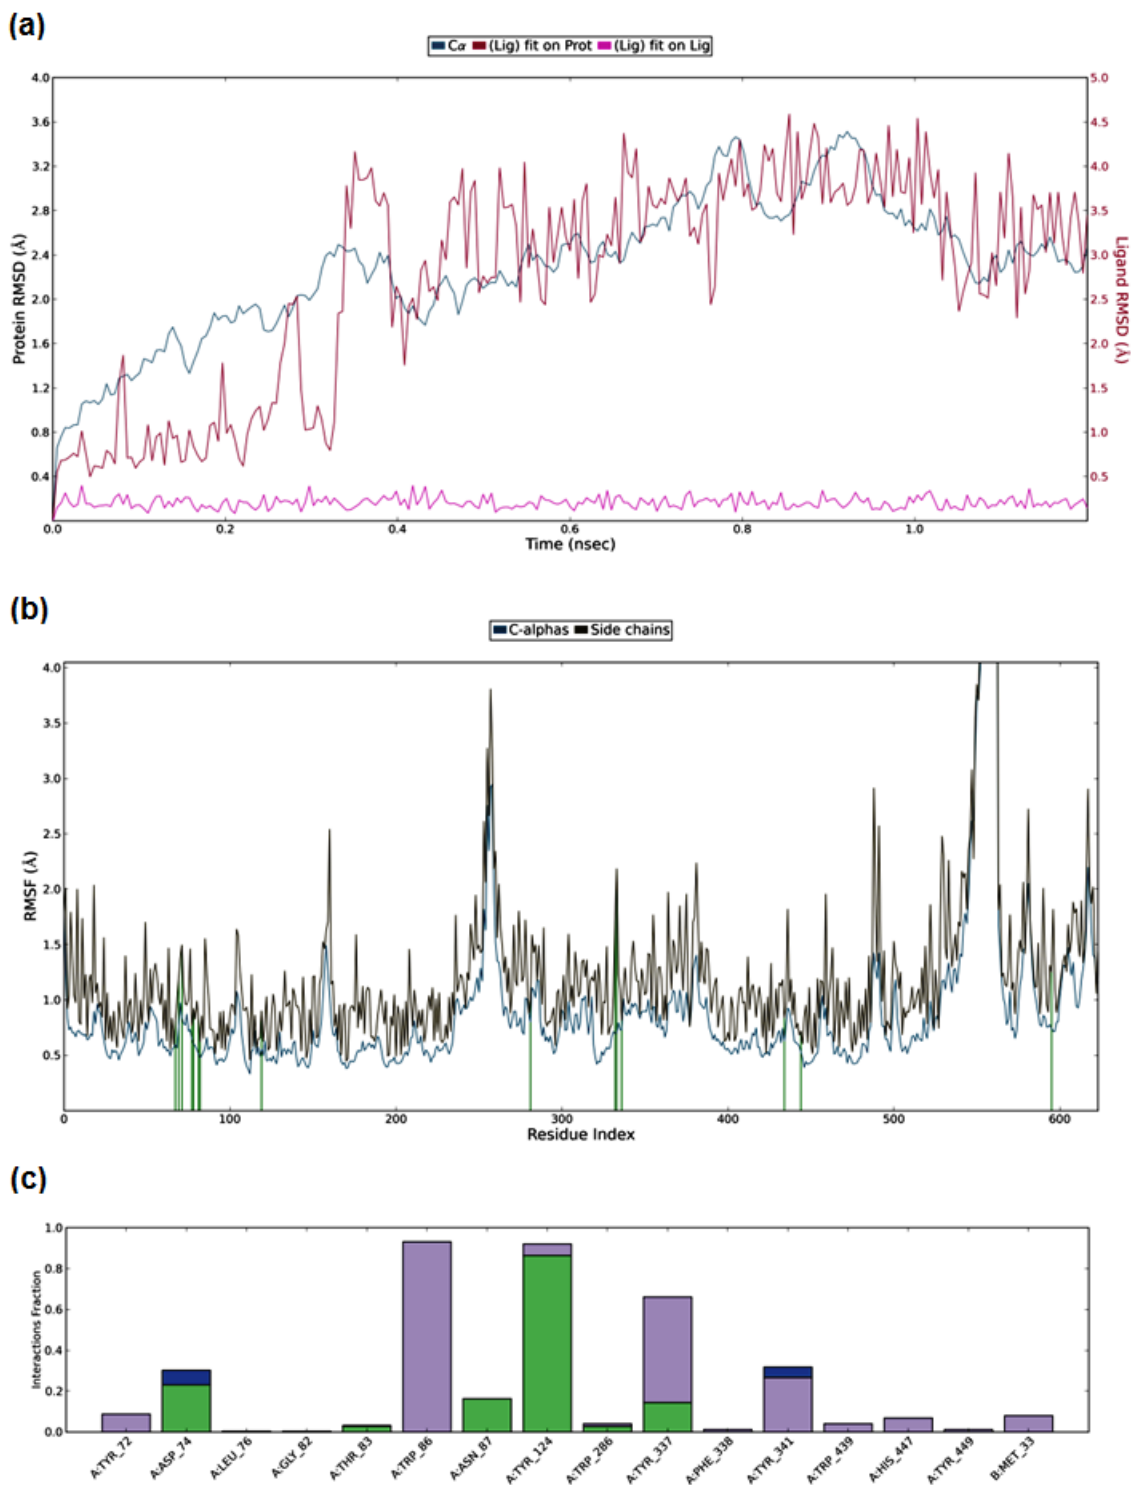

**Figure S22.** RMSDs **(a)**, RMSFs **(b)**, and Interaction diagrams **(c)** of *hAChE* in complex with carbaryl. The green bars present hydrogen bonds, the purple bars show hydrophobic interactions, the pink bars show ionic interaction, the blue bars present water bridges.

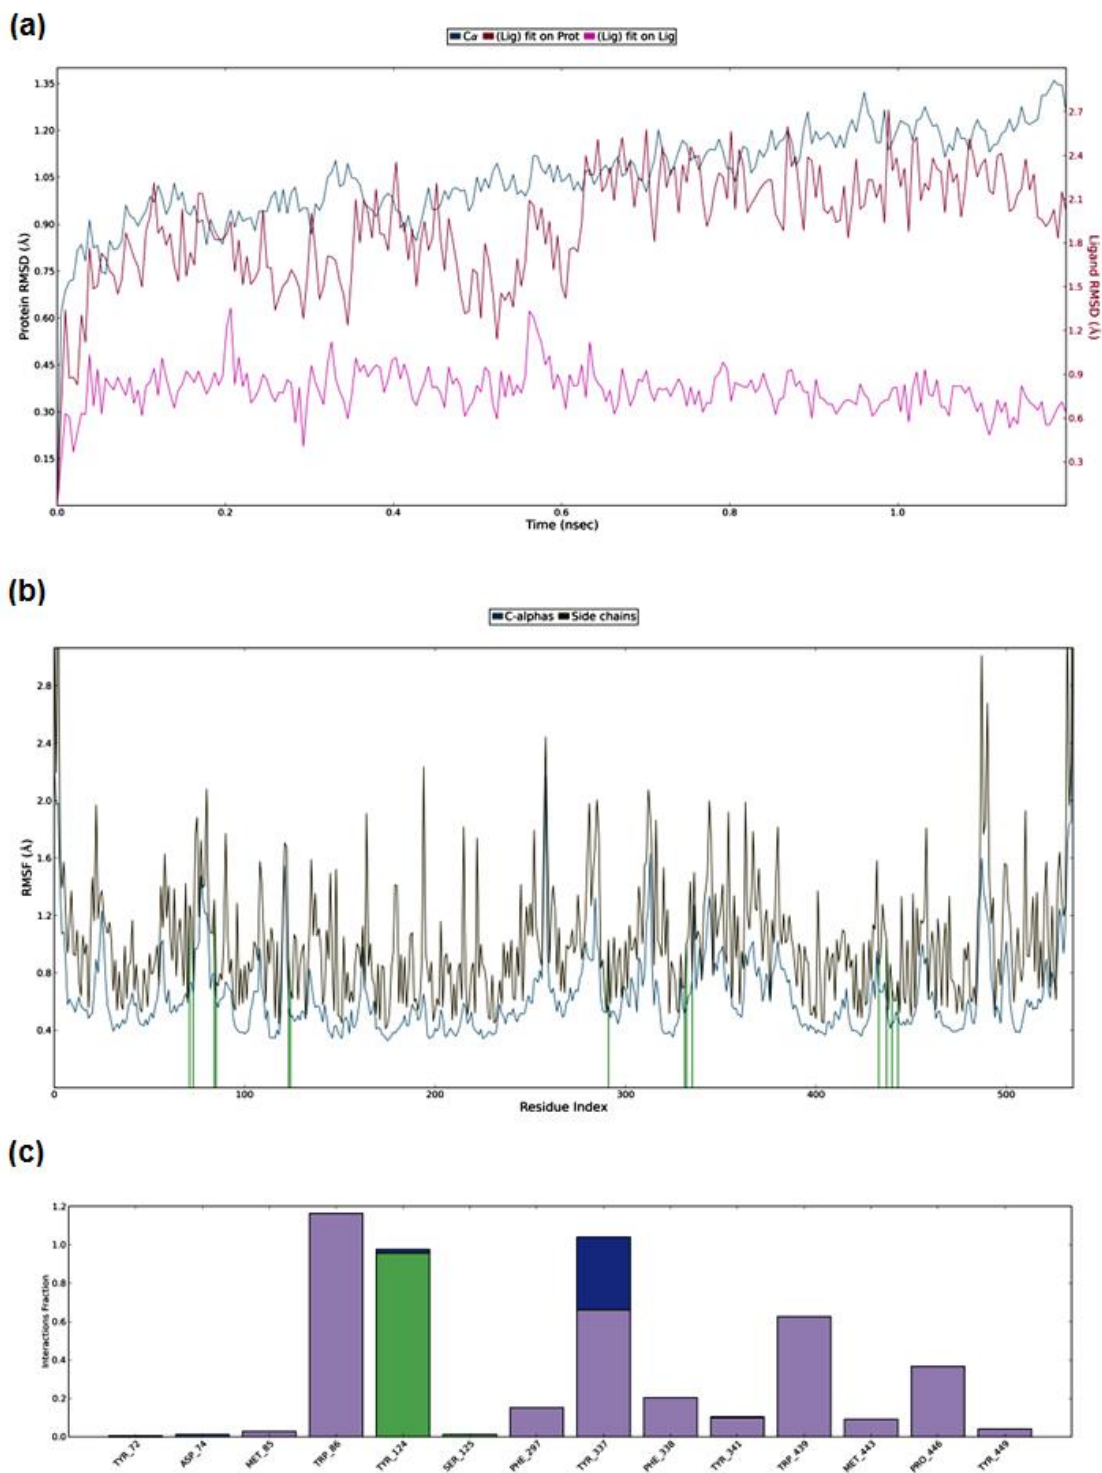

**Figure S23.** RMSDs **(a)**, RMSFs **(b)**, and Interaction diagrams **(c)** of *m*AChE in complex with tebufenozide. The green bars present hydrogen bonds, the purple bars show hydrophobic interactions, the pink bars show ionic interaction, the blue bars present water bridges.

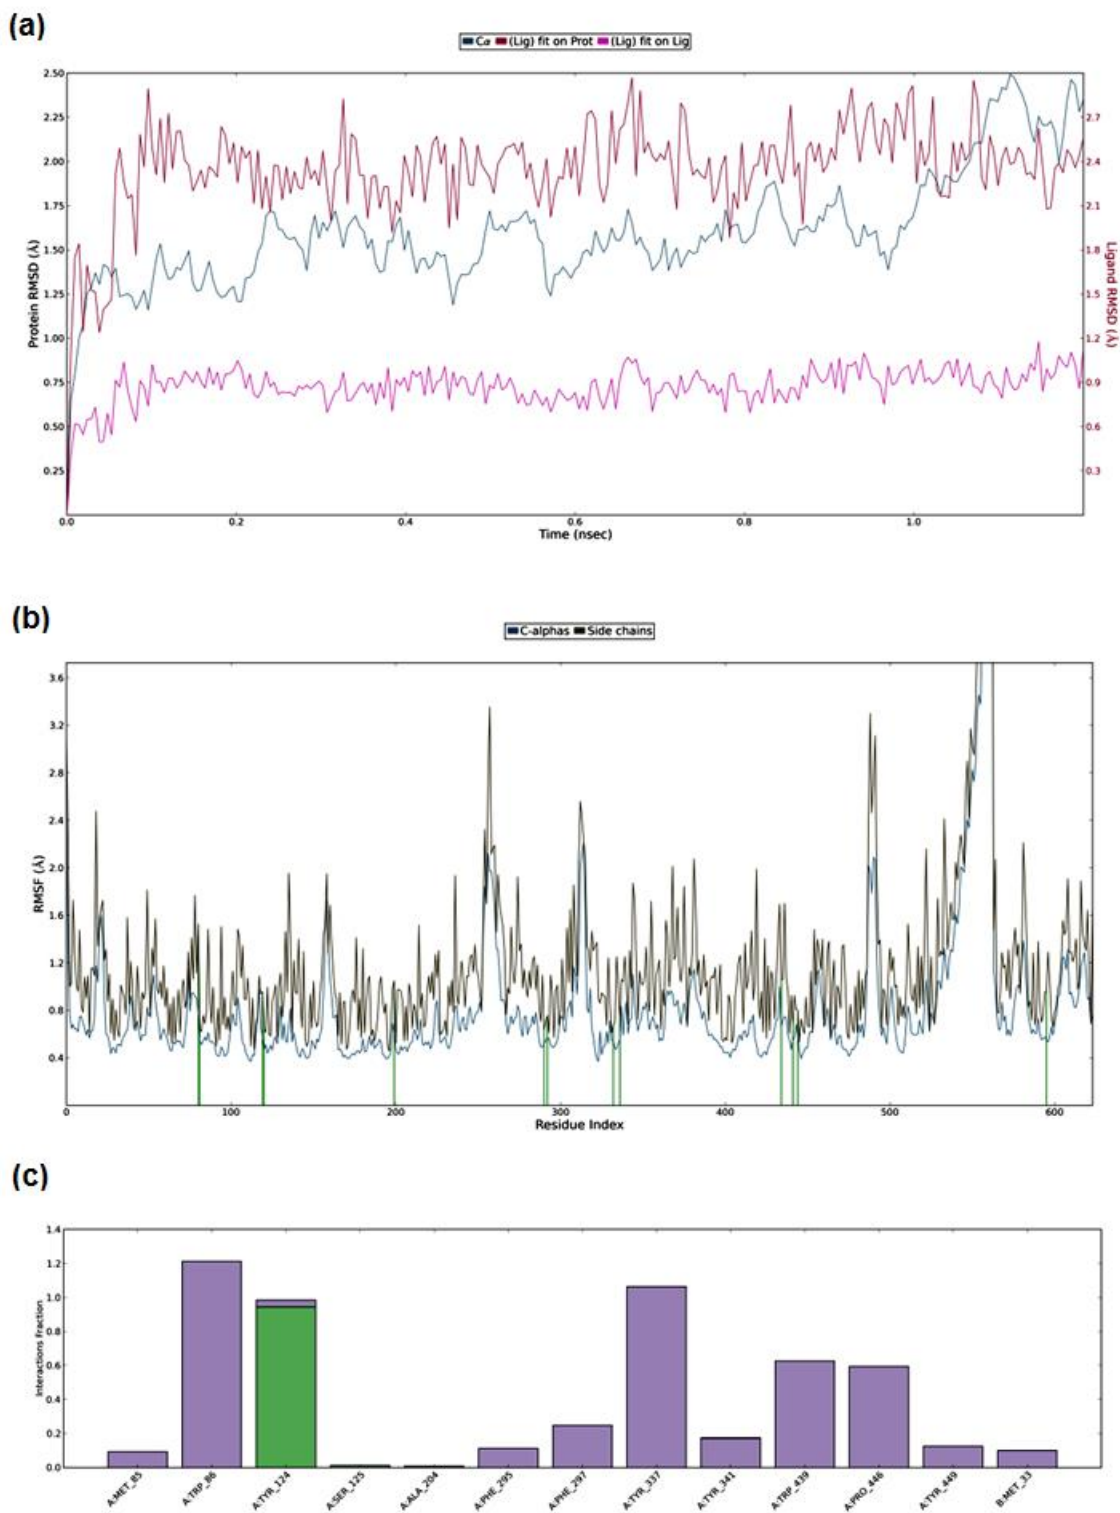

**Figure S24.** RMSDs **(a)**, RMSFs **(b)**, and Interaction diagrams **(c)** of *hAChE* in complex with tebufenozide. The green bars present hydrogen bonds, the purple bars show hydrophobic interactions, the pink bars show ionic interaction, the blue bars present water bridges.

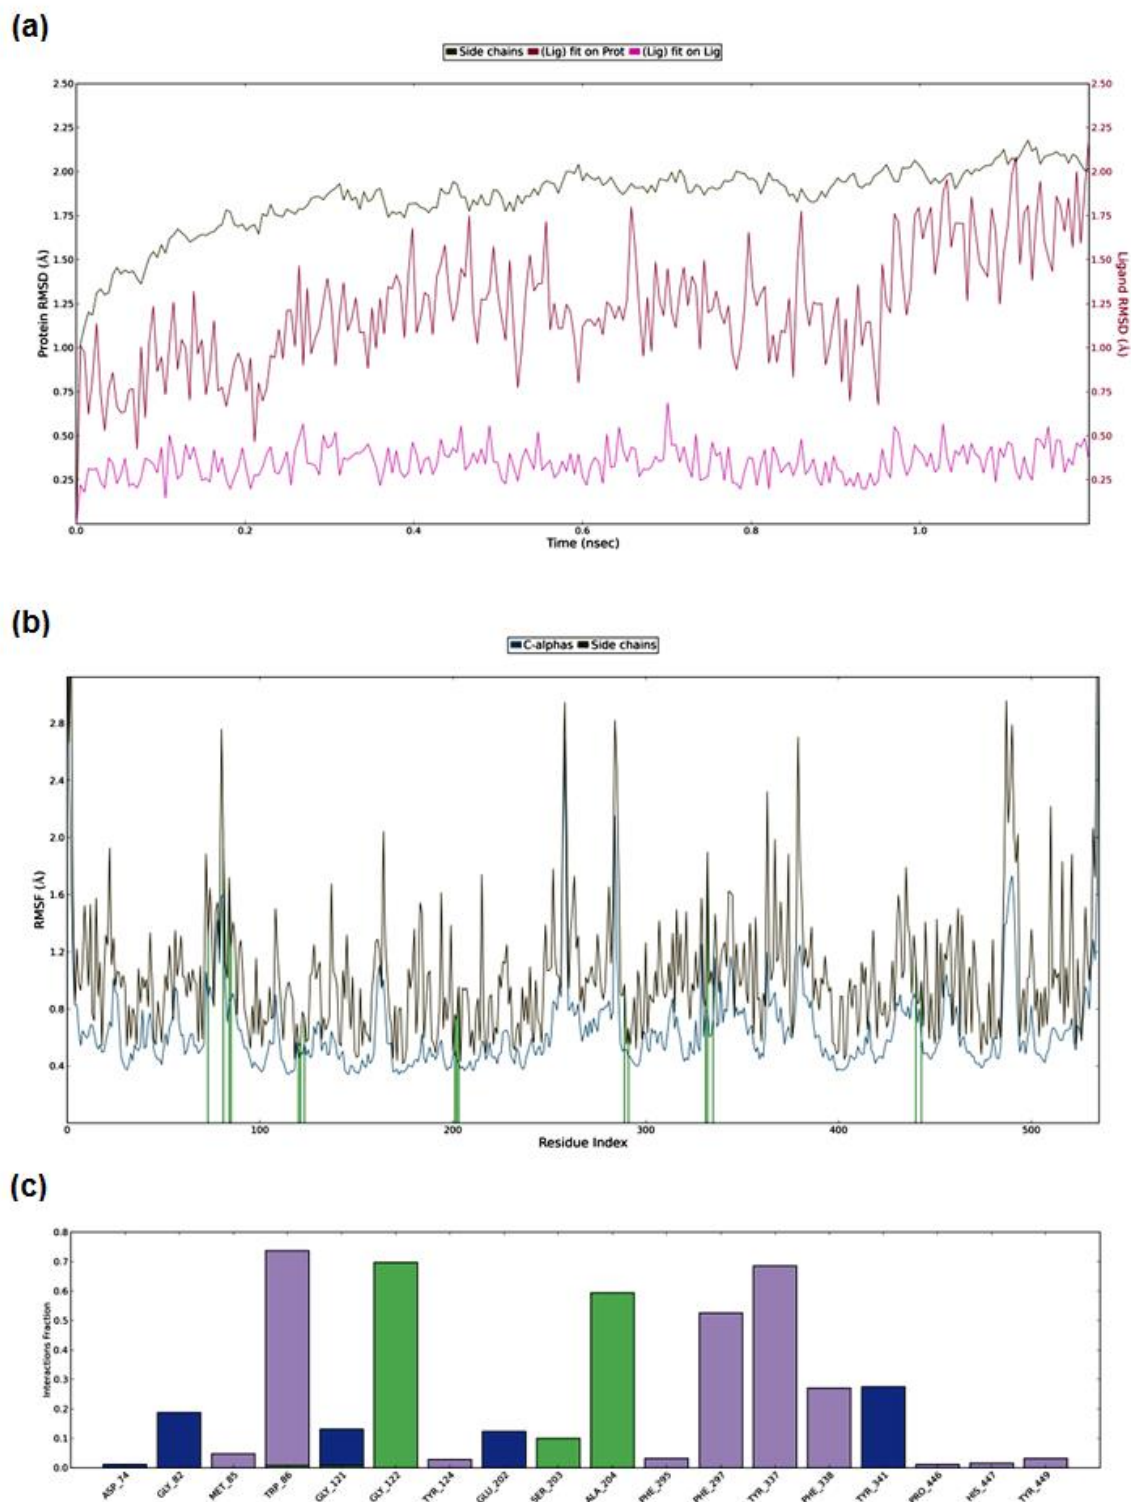

**Figure S25.** RMSDs (a), RMSFs (b), and Interaction diagrams (c) of *m*AChE in complex with imidacloprid. The green bars present hydrogen bonds, the purple bars show hydrophobic interactions, the pink bars show ionic interaction, the blue bars present water bridges.

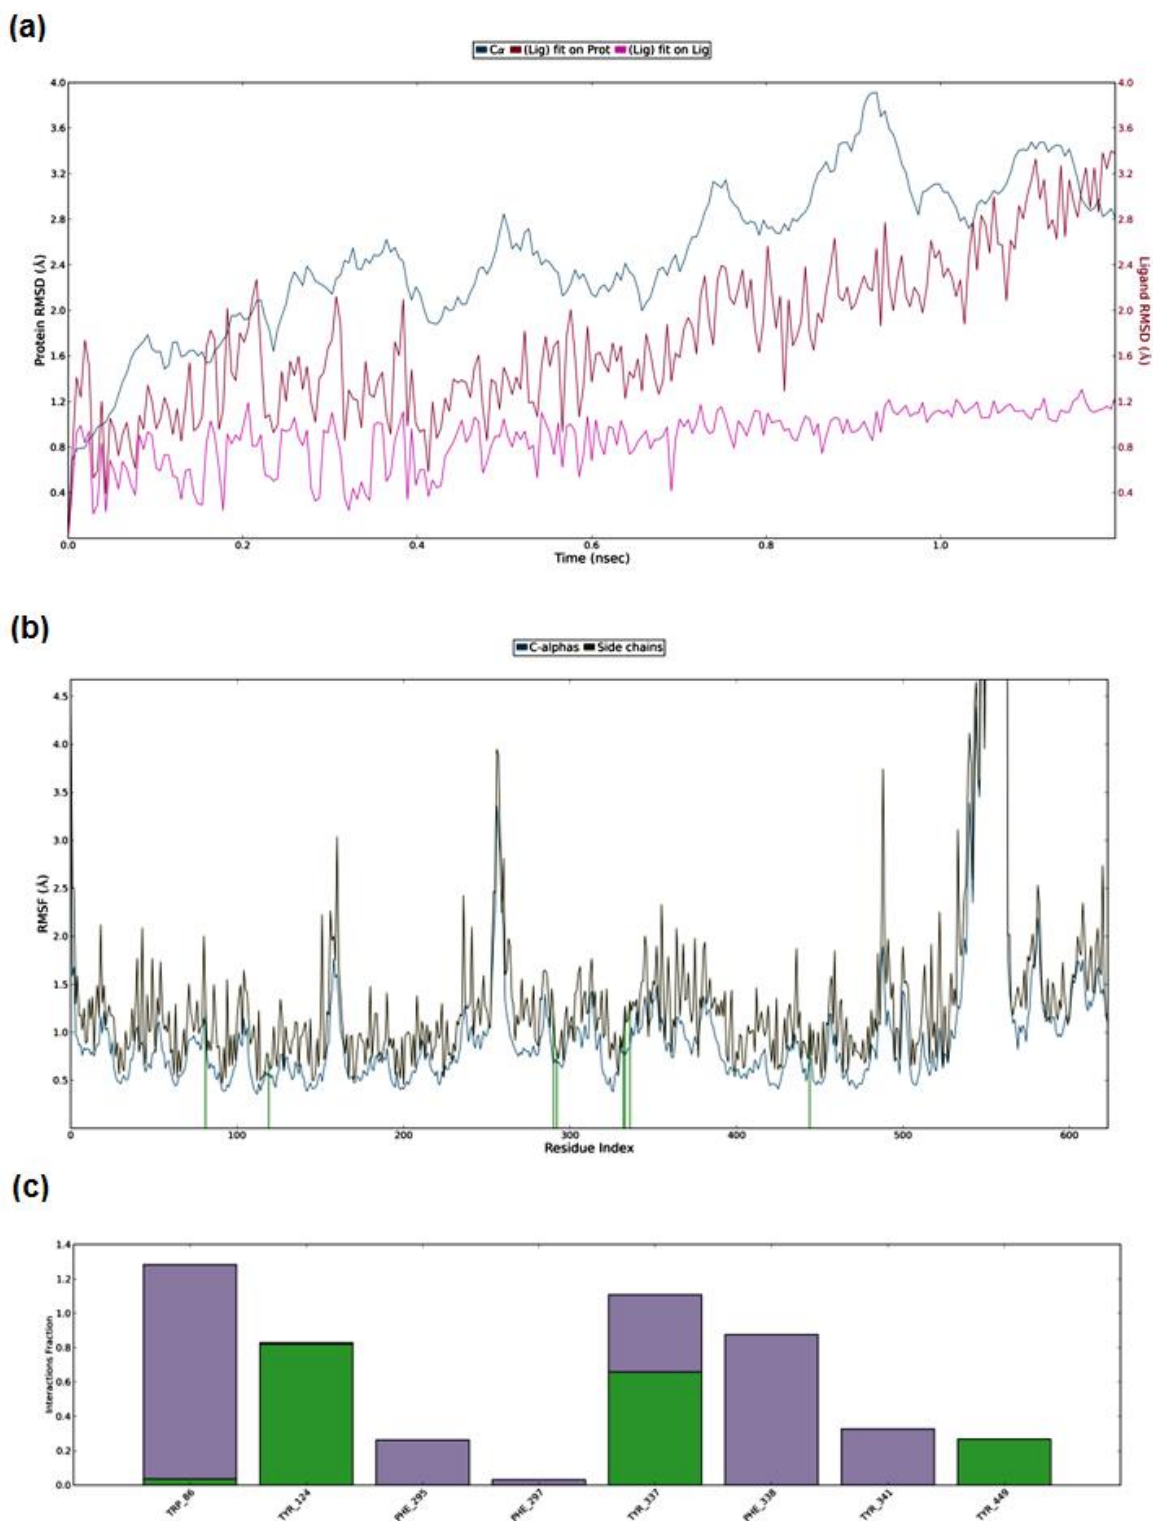

**Figure S26.** RMSDs **(a)**, RMSFs **(b)**, Interaction diagrams **(c)** of *hAChE* in complex with imidacloprid. The green bars present hydrogen bonds, the purple bars show hydrophobic interactions, the pink bars show ionic interaction, the blue bars present water bridges.

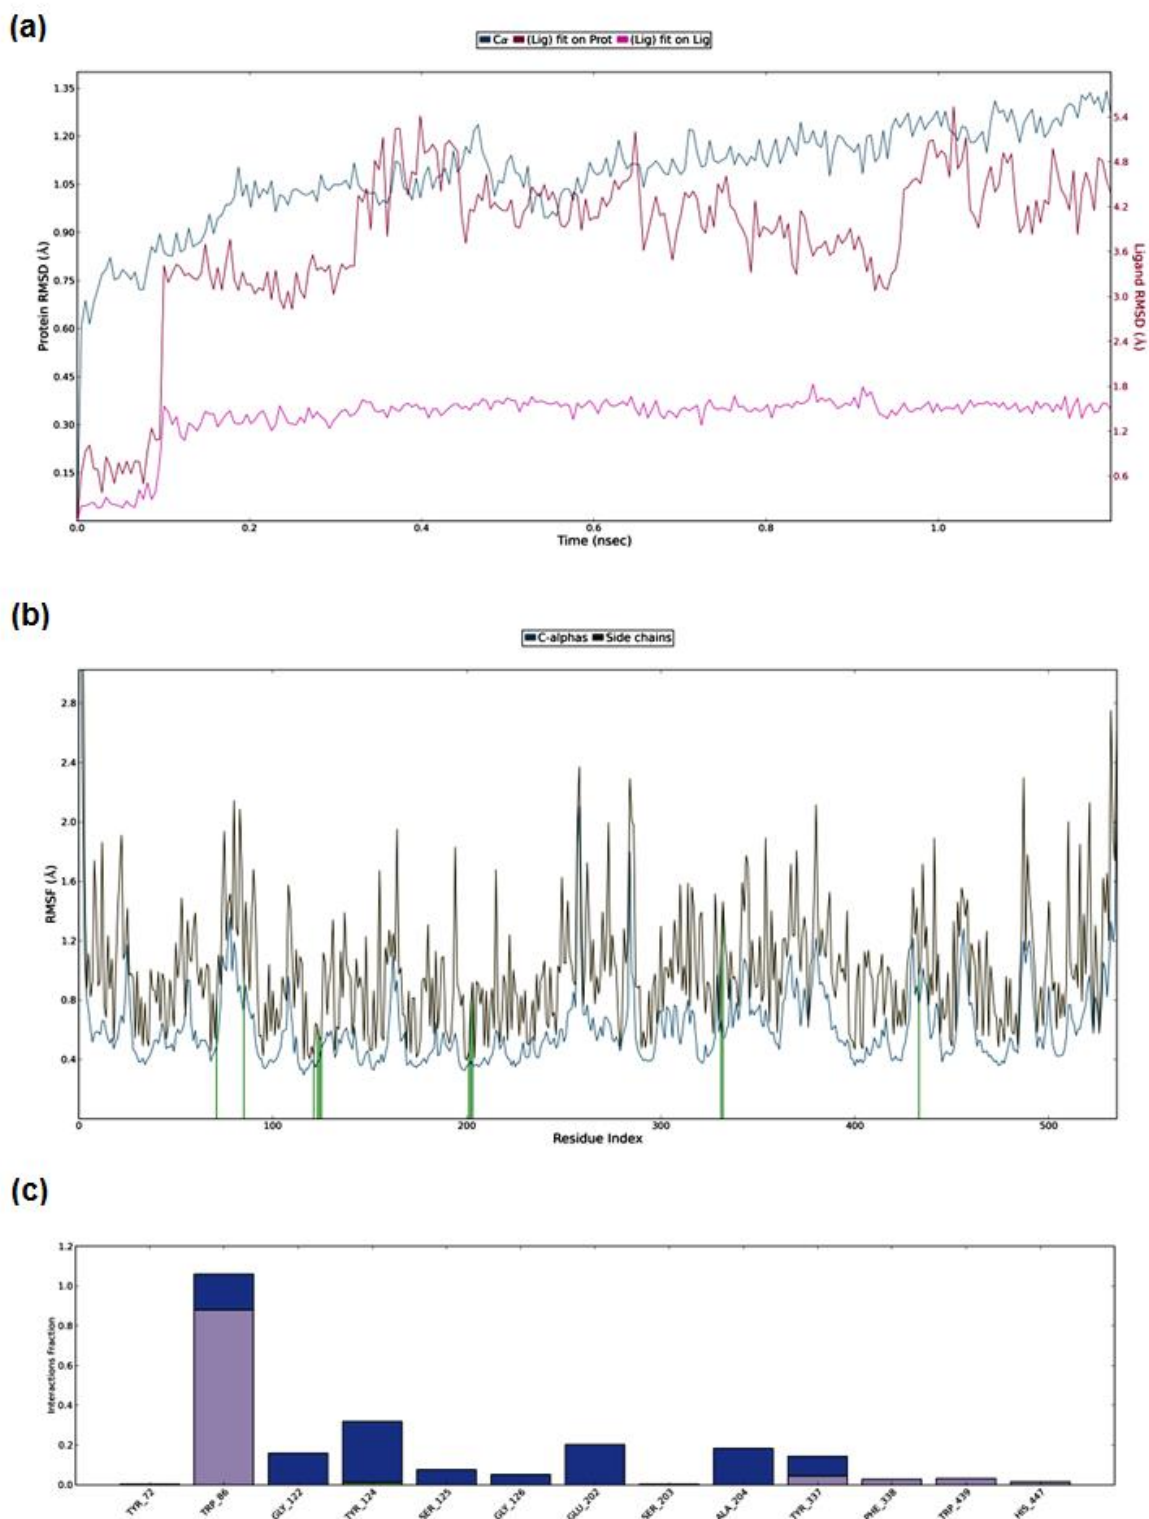

**Figure S27.** RMSDs (a), RMSFs (b), and Interaction diagrams (c) of *m*AChE in complex with acetamiprid. The green bars present hydrogen bonds, the purple bars show hydrophobic interactions, the pink bars show ionic interaction, the blue bars present water bridges.



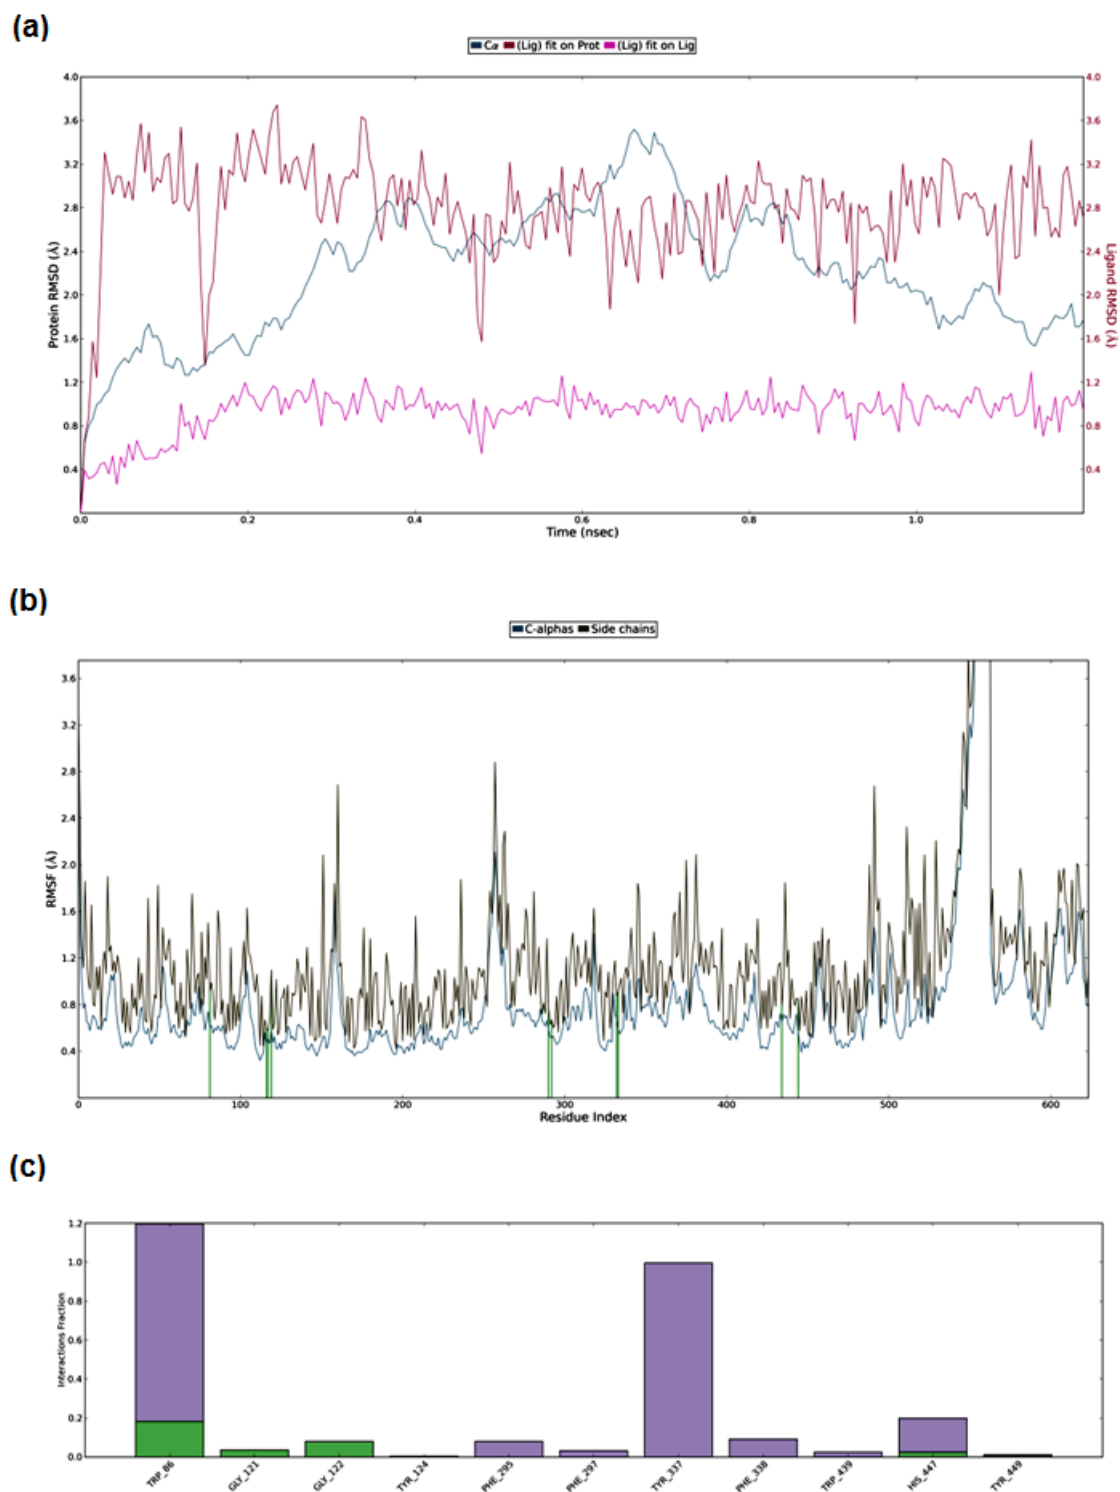

**Figure S28.** RMSDs (a), RMSFs (b), and Interaction diagrams (c) of *hAChE* in complex with acetamiprid. The green bars present hydrogen bonds, the purple bars show hydrophobic interactions, the pink bars show ionic interaction, the blue bars present water bridges.

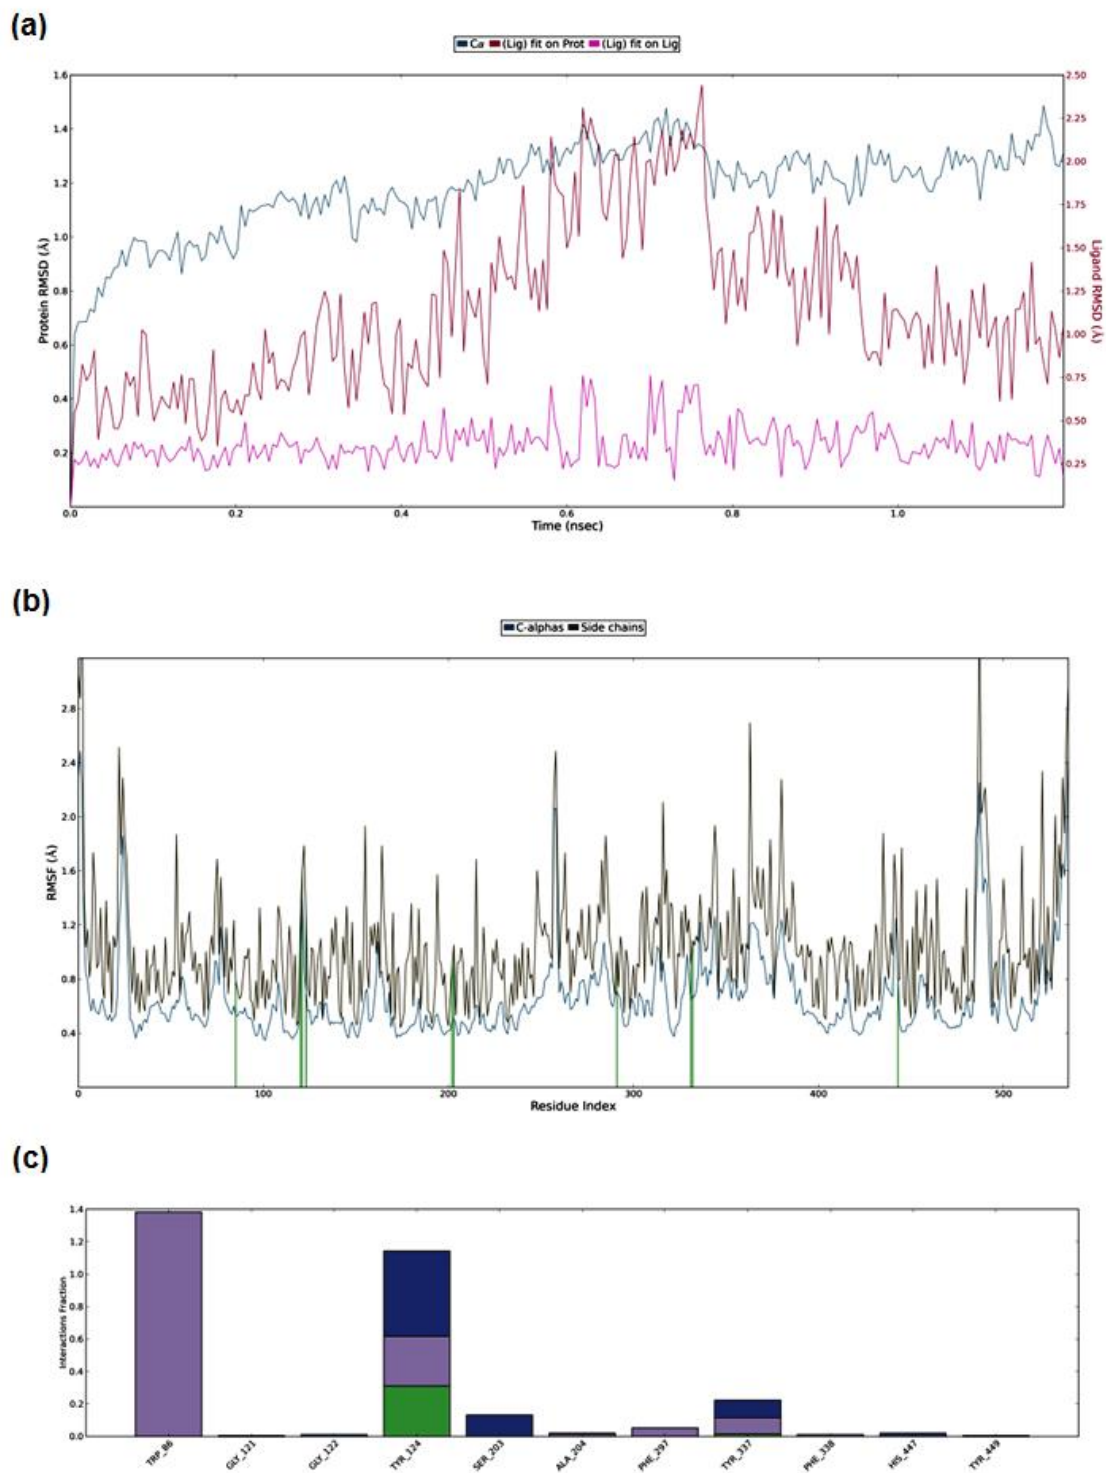

**Figure S29.** RMSDs **(a)**, RMSFs **(b)**, and Interaction diagrams **(c)** of *mAChE* in complex with diuron. The green bars present hydrogen bonds, the purple bars show hydrophobic interactions, the pink bars show ionic interaction, the blue bars present water bridges.

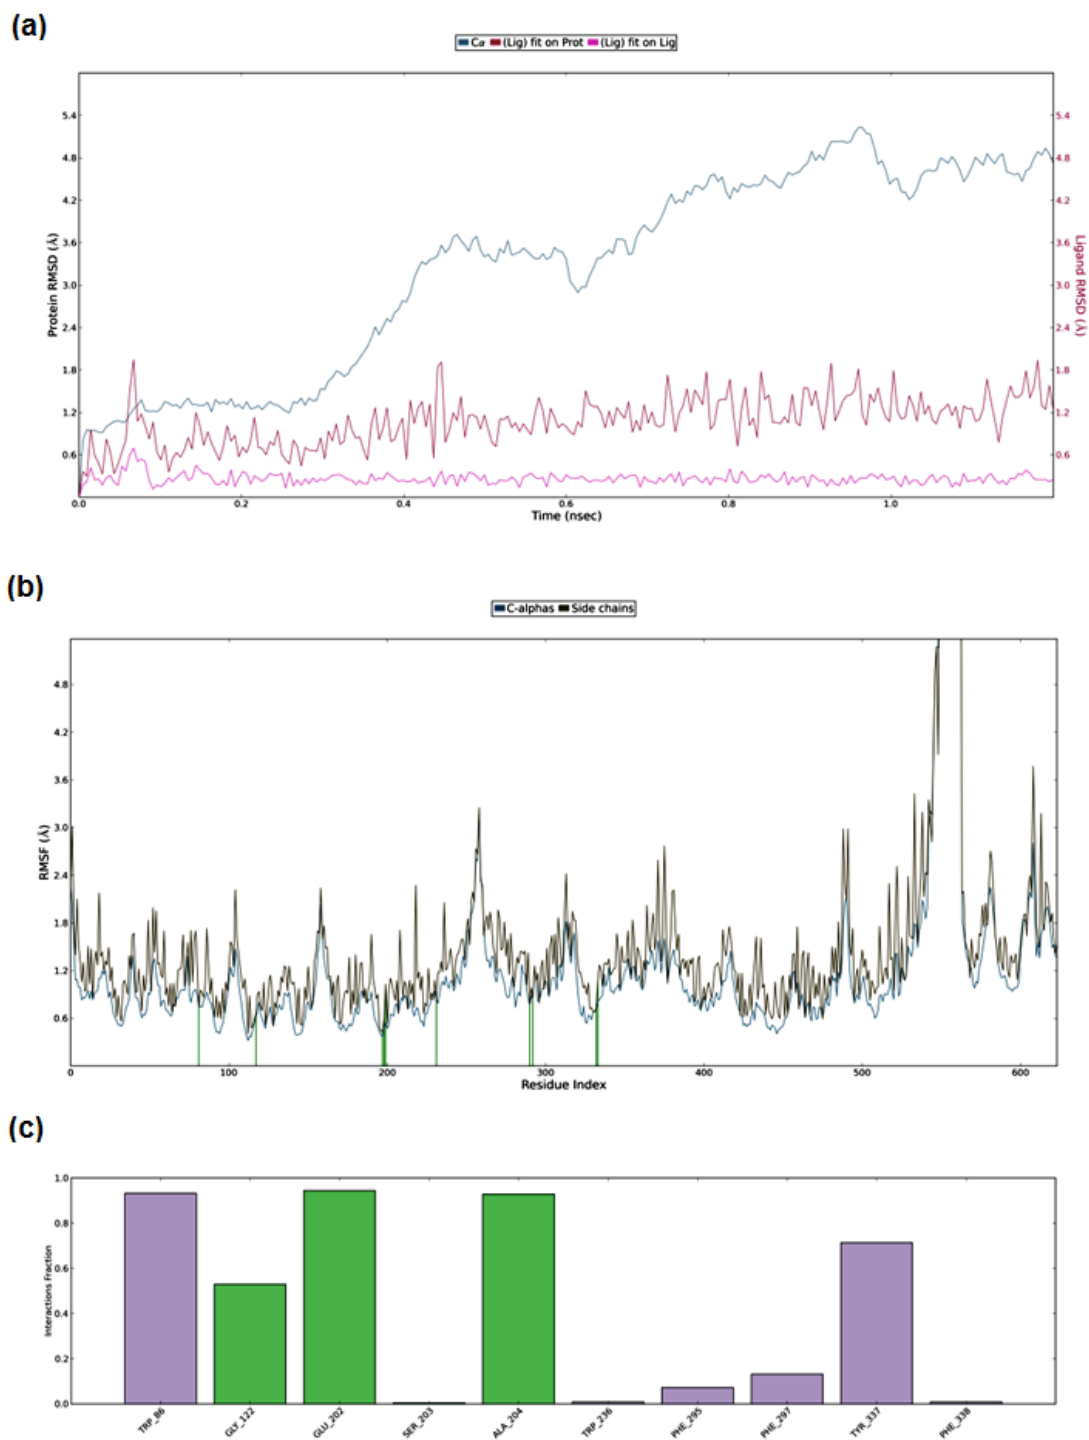

**Figure S30.** RMSDs (a), RMSFs (b), and Interaction diagrams (c) of *hAChE* in complex with diuron. The green bars present hydrogen bonds, the purple bars show hydrophobic interactions, the pink bars show ionic interaction, the blue bars present water bridges.

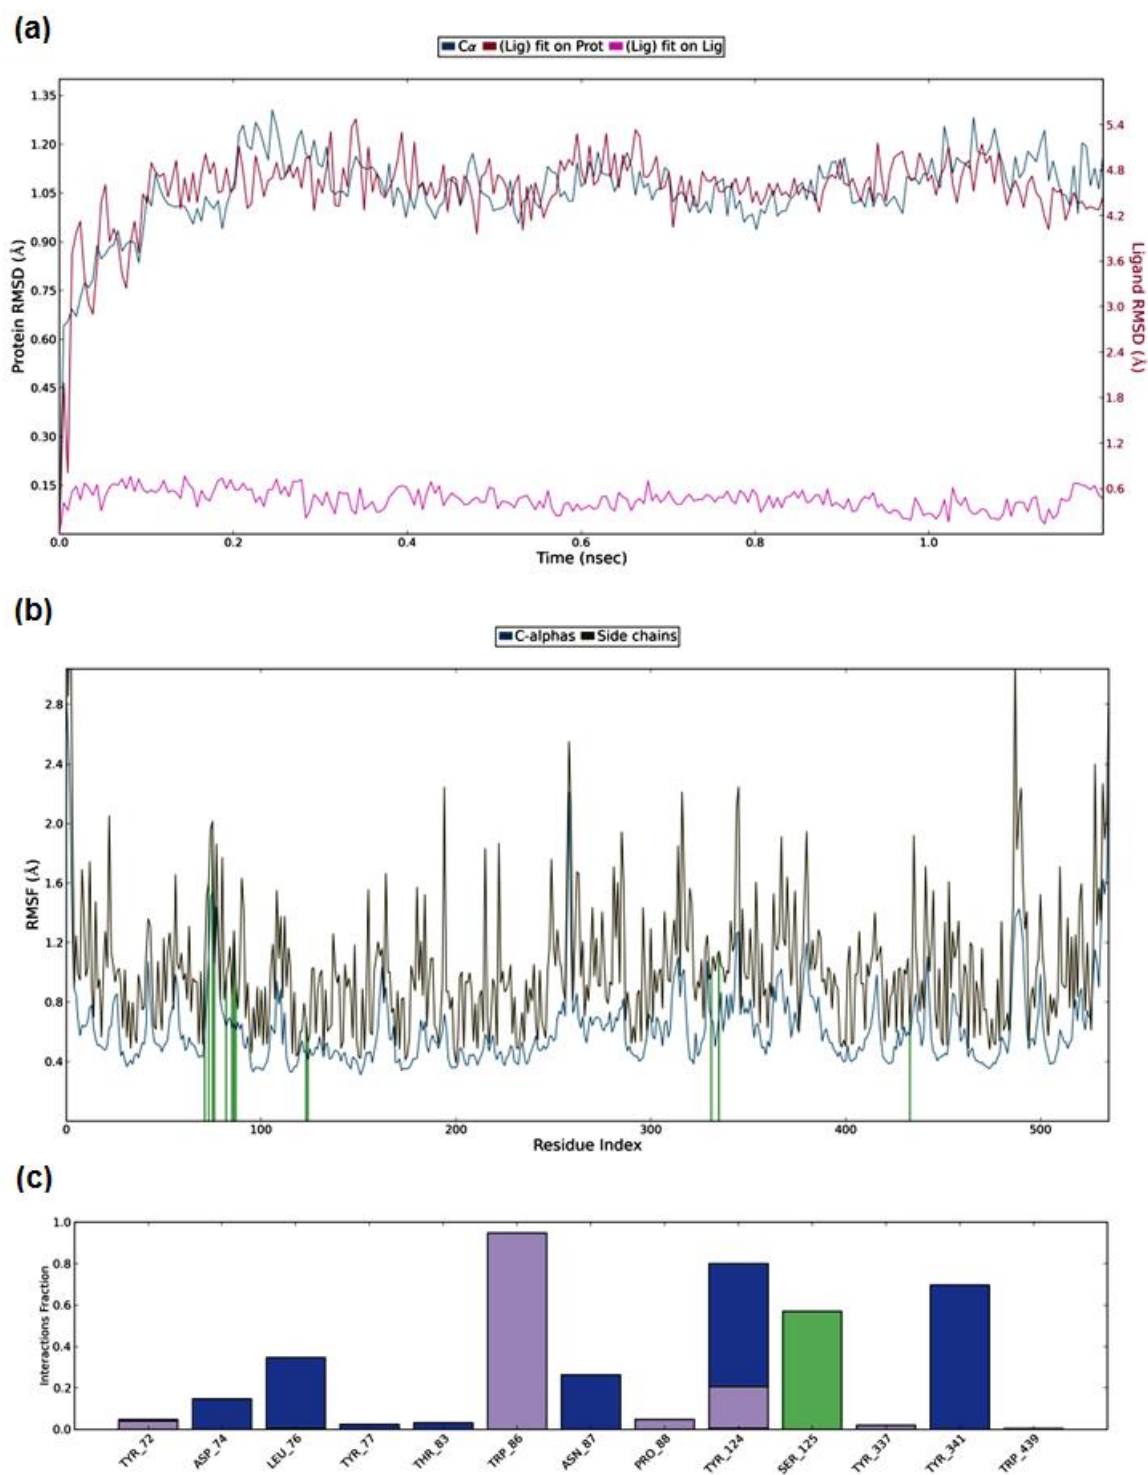

**Figure S31.** RMSDs (a), RMSFs (b), and Interaction diagrams (c) of *m*AChE in complex with monuron. The green bars present hydrogen bonds, the purple bars show hydrophobic interactions, the pink bars show ionic interaction, the blue bars present water bridges.

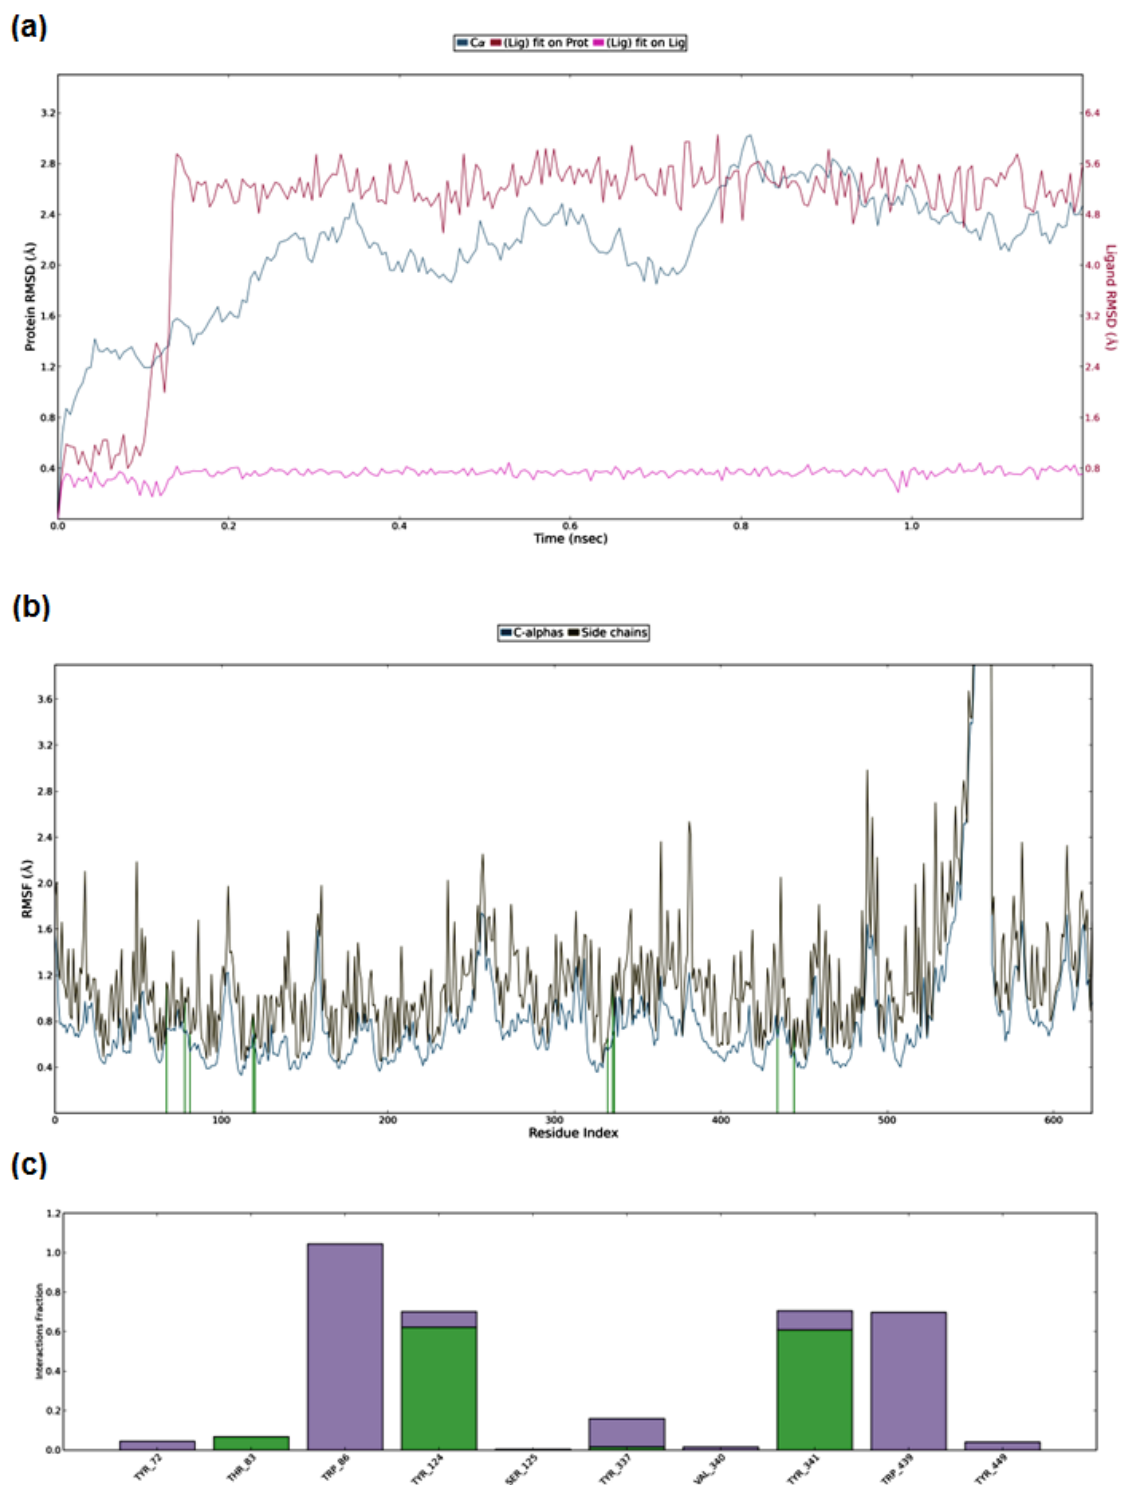

**Figure S32.** RMSDs (a), RMSFs (b), and Interaction diagrams (c) of *hAChE* in complex with monuron. The green bars present hydrogen bonds, the purple bars show hydrophobic interactions, the pink bars show ionic interaction, the blue bars present water bridges.

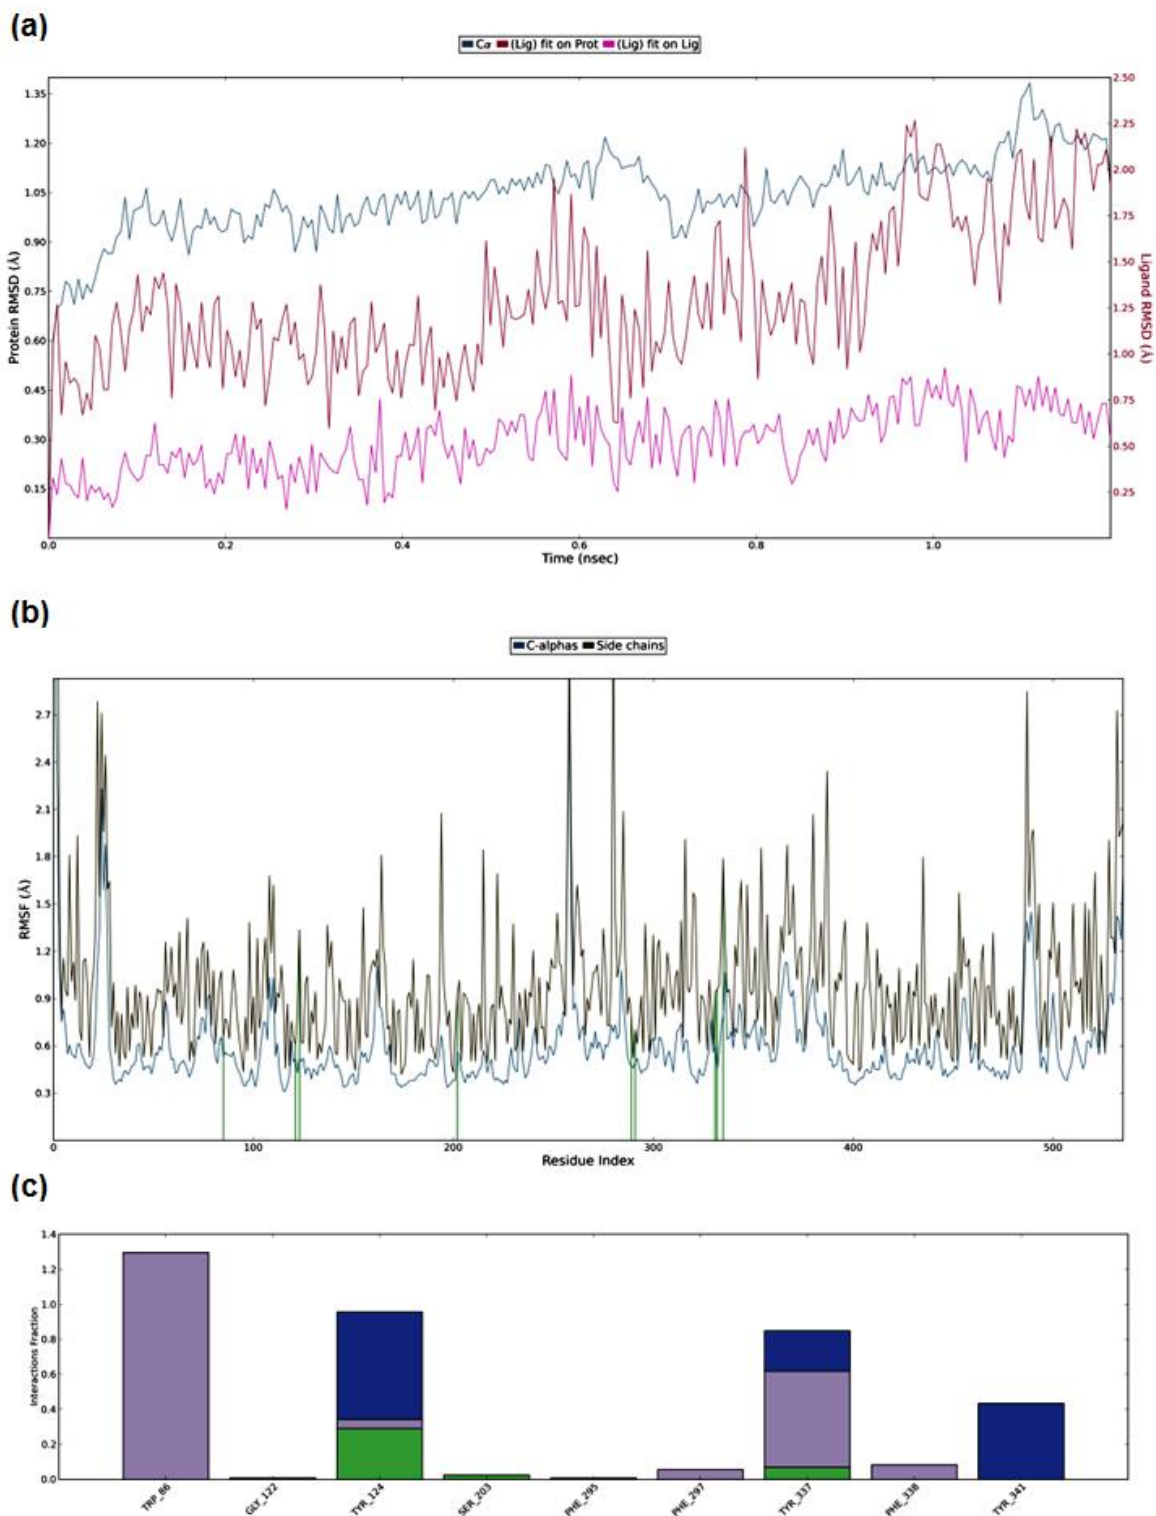

**Figure S33.** RMSDs (a), RMSFs (b), and Interaction diagrams (c) of *mAChE* in complex with linuron. The green bars present hydrogen bonds, the purple bars show hydrophobic interactions, the pink bars show ionic interaction, the blue bars present water bridges.

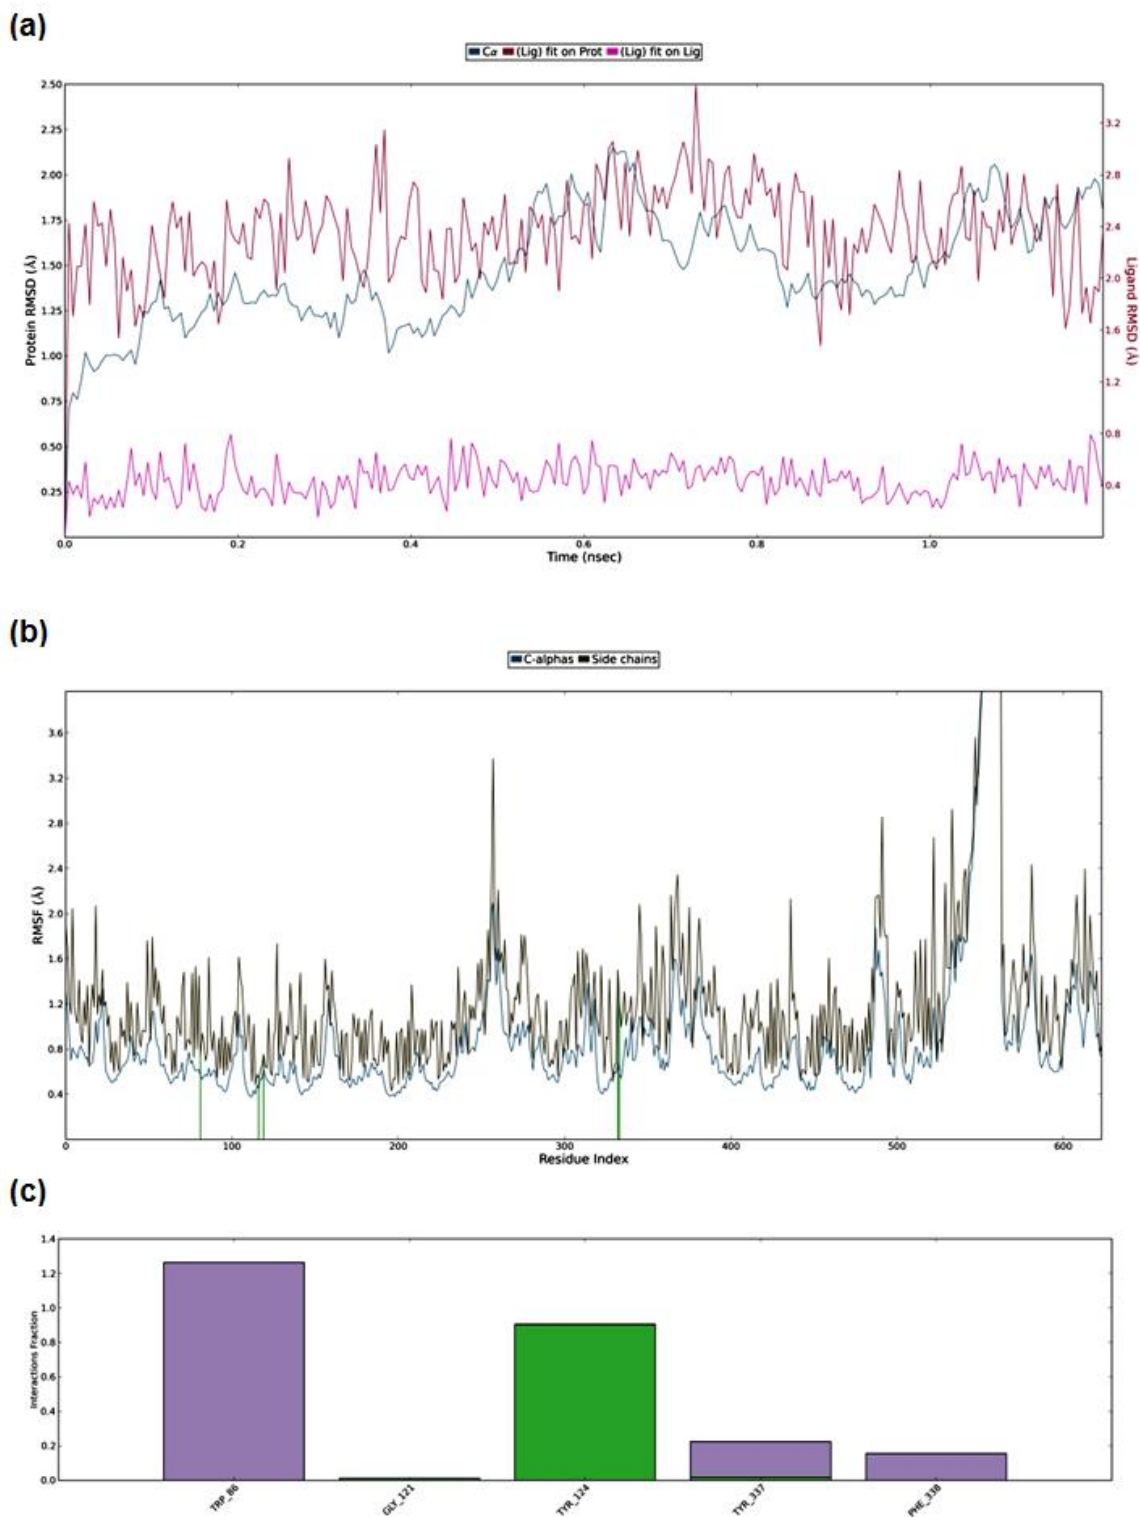

**Figure S34.** RMSDs (a), RMSFs (b), and Interaction diagrams (c) of *m*AChE in complex with linuron. The green bars present hydrogen bonds, the purple bars show hydrophobic interactions, the pink bars show ionic interaction, the blue bars present water bridges.

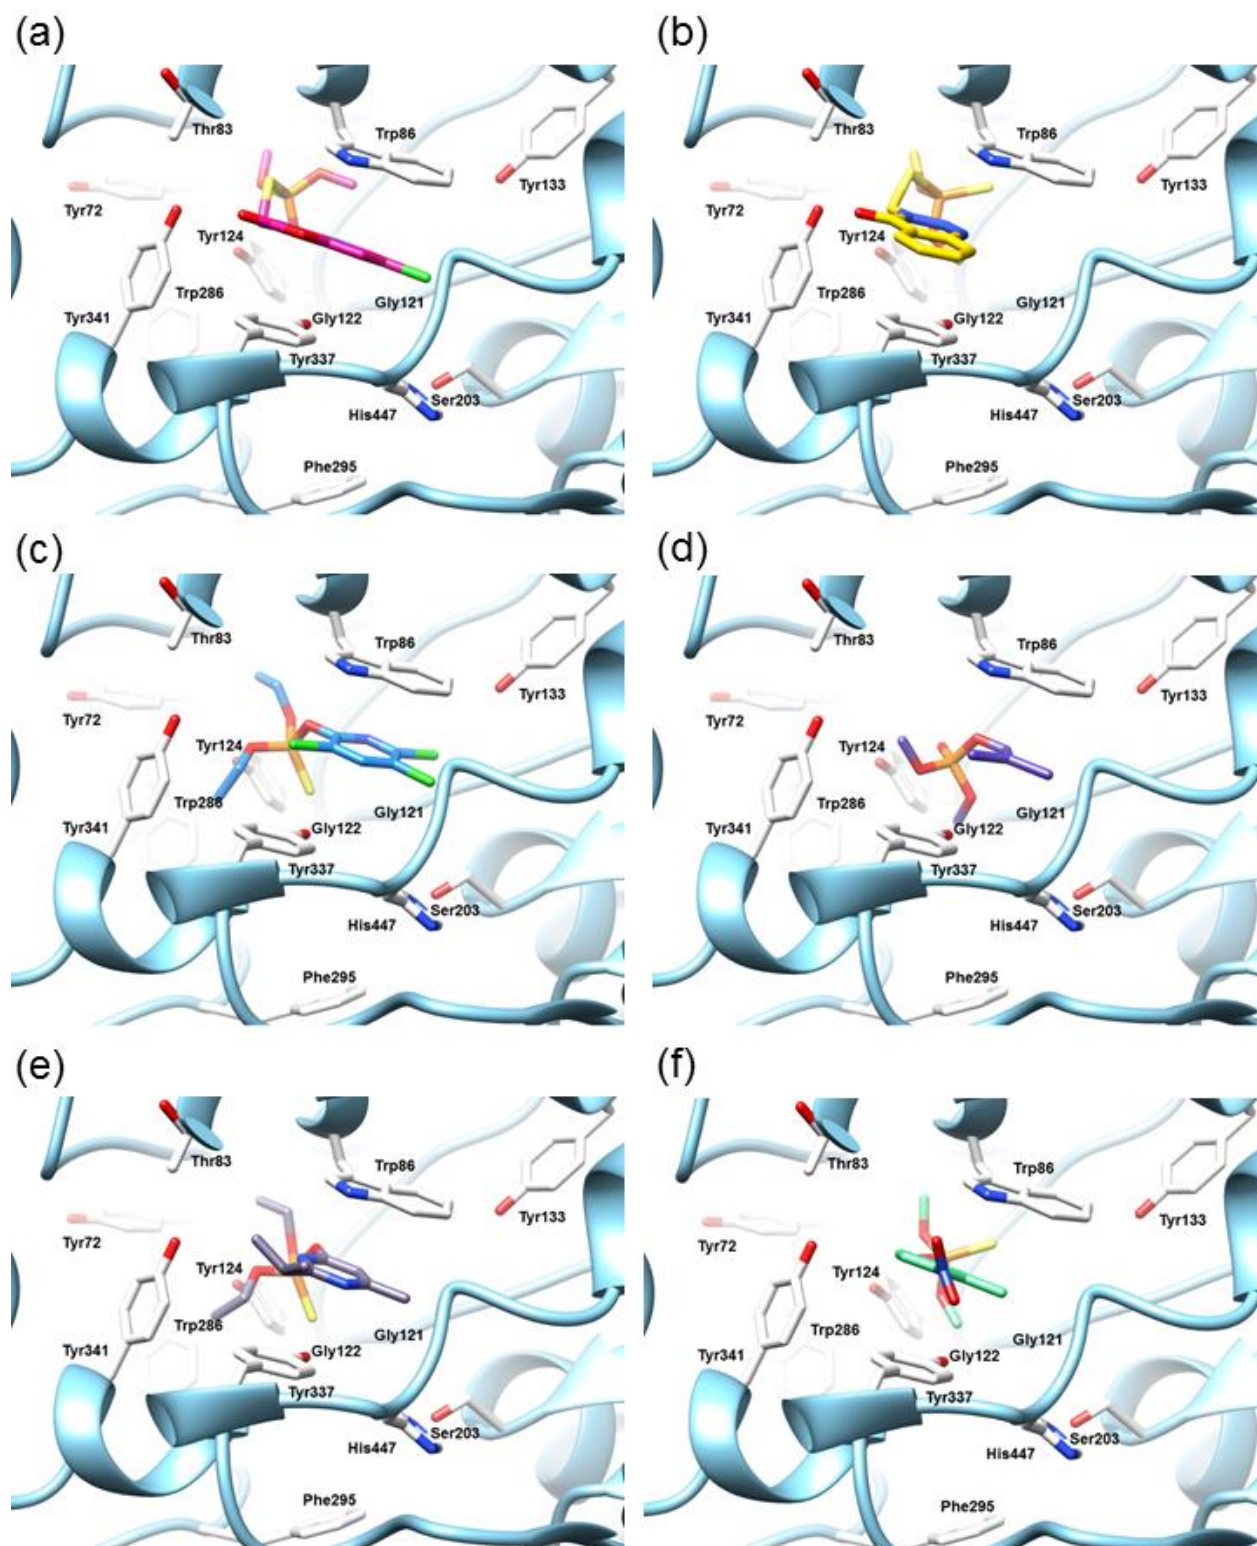

**Figure S35.** The SB alignment of azamethiphos (a), azinphos-methyl (b), chlorpyrifos (c), DDVP (d), diazinon (e), and fenitrothion (f) into the *m*AChE active site. The enzyme ribbons are presented in blue, active site amino acids are depicted in white. For the clarity purpose, hydrogen atoms are omitted from presentation.



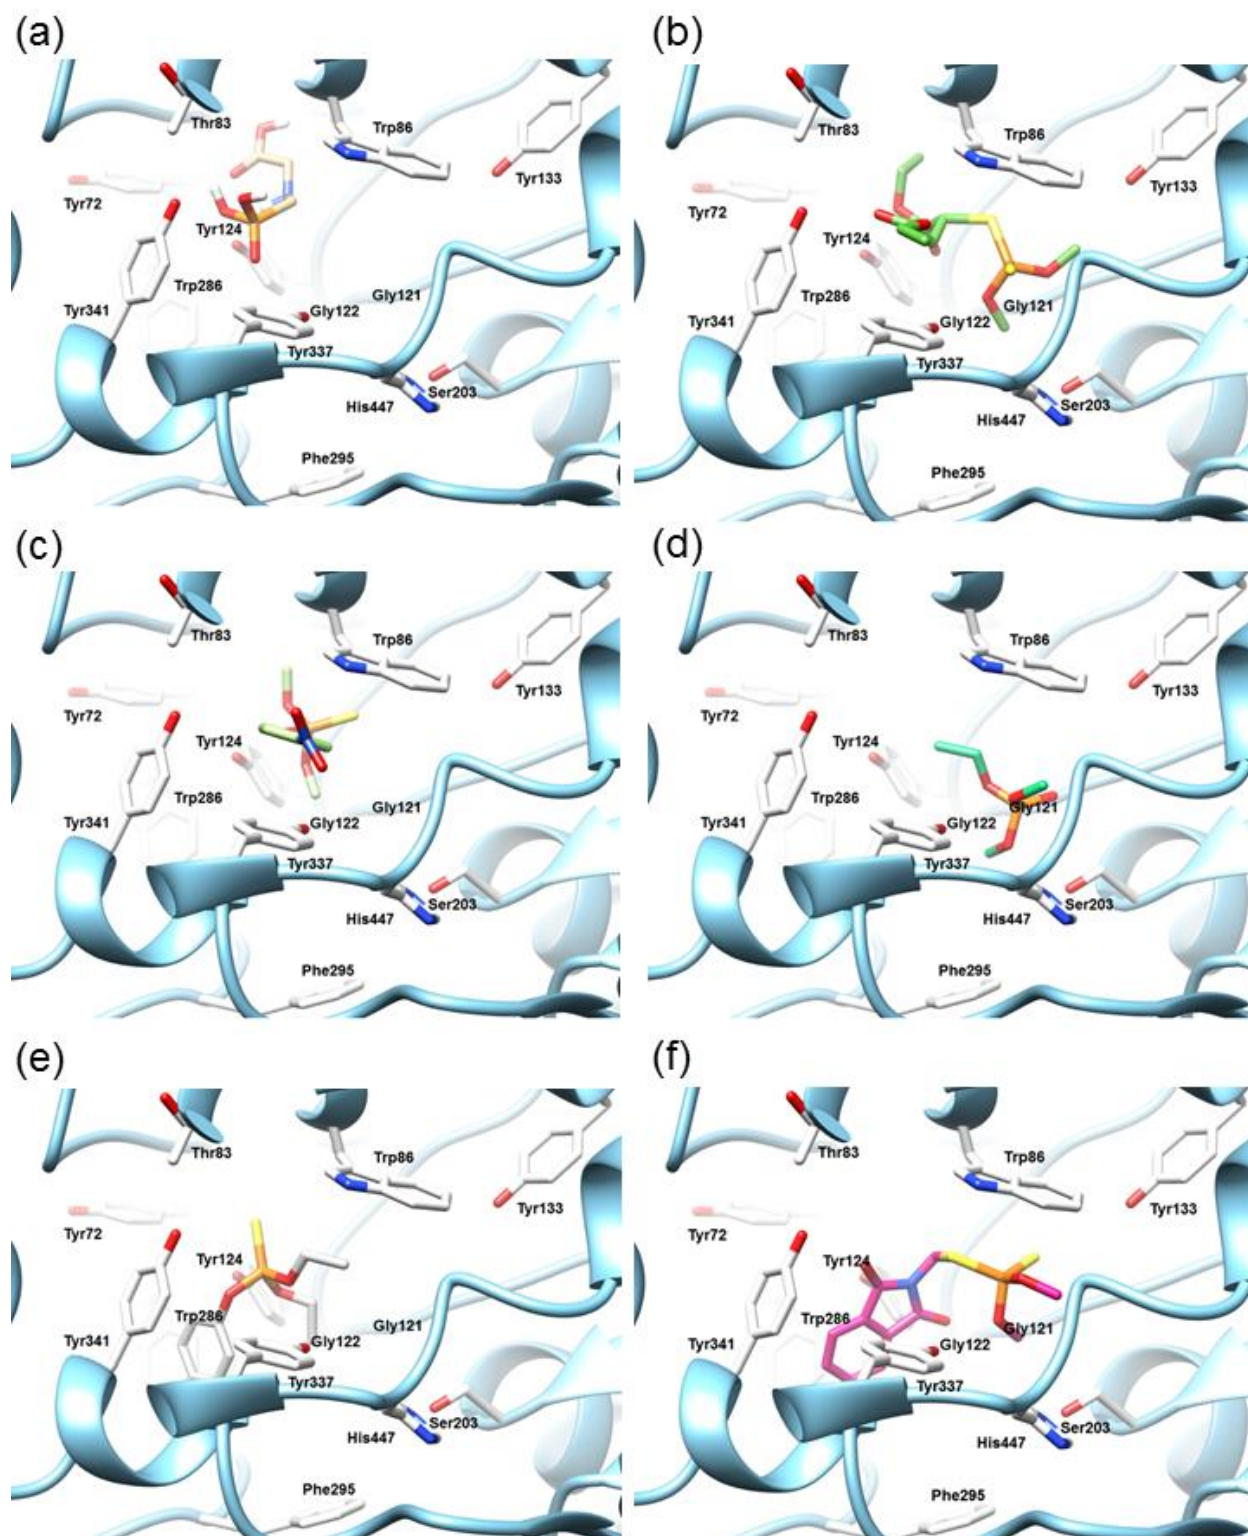

**Figure S36.** The SB alignment of glyphosate (a), malathion (b), methyl parathion (c), naled (dibrom) (d), parathion (e), and phosmet (f) into the *mAChE* active site. The enzyme ribbons are presented in blue, active site amino acids are depicted in white. For the clarity purpose, hydrogen atoms are omitted from presentation.

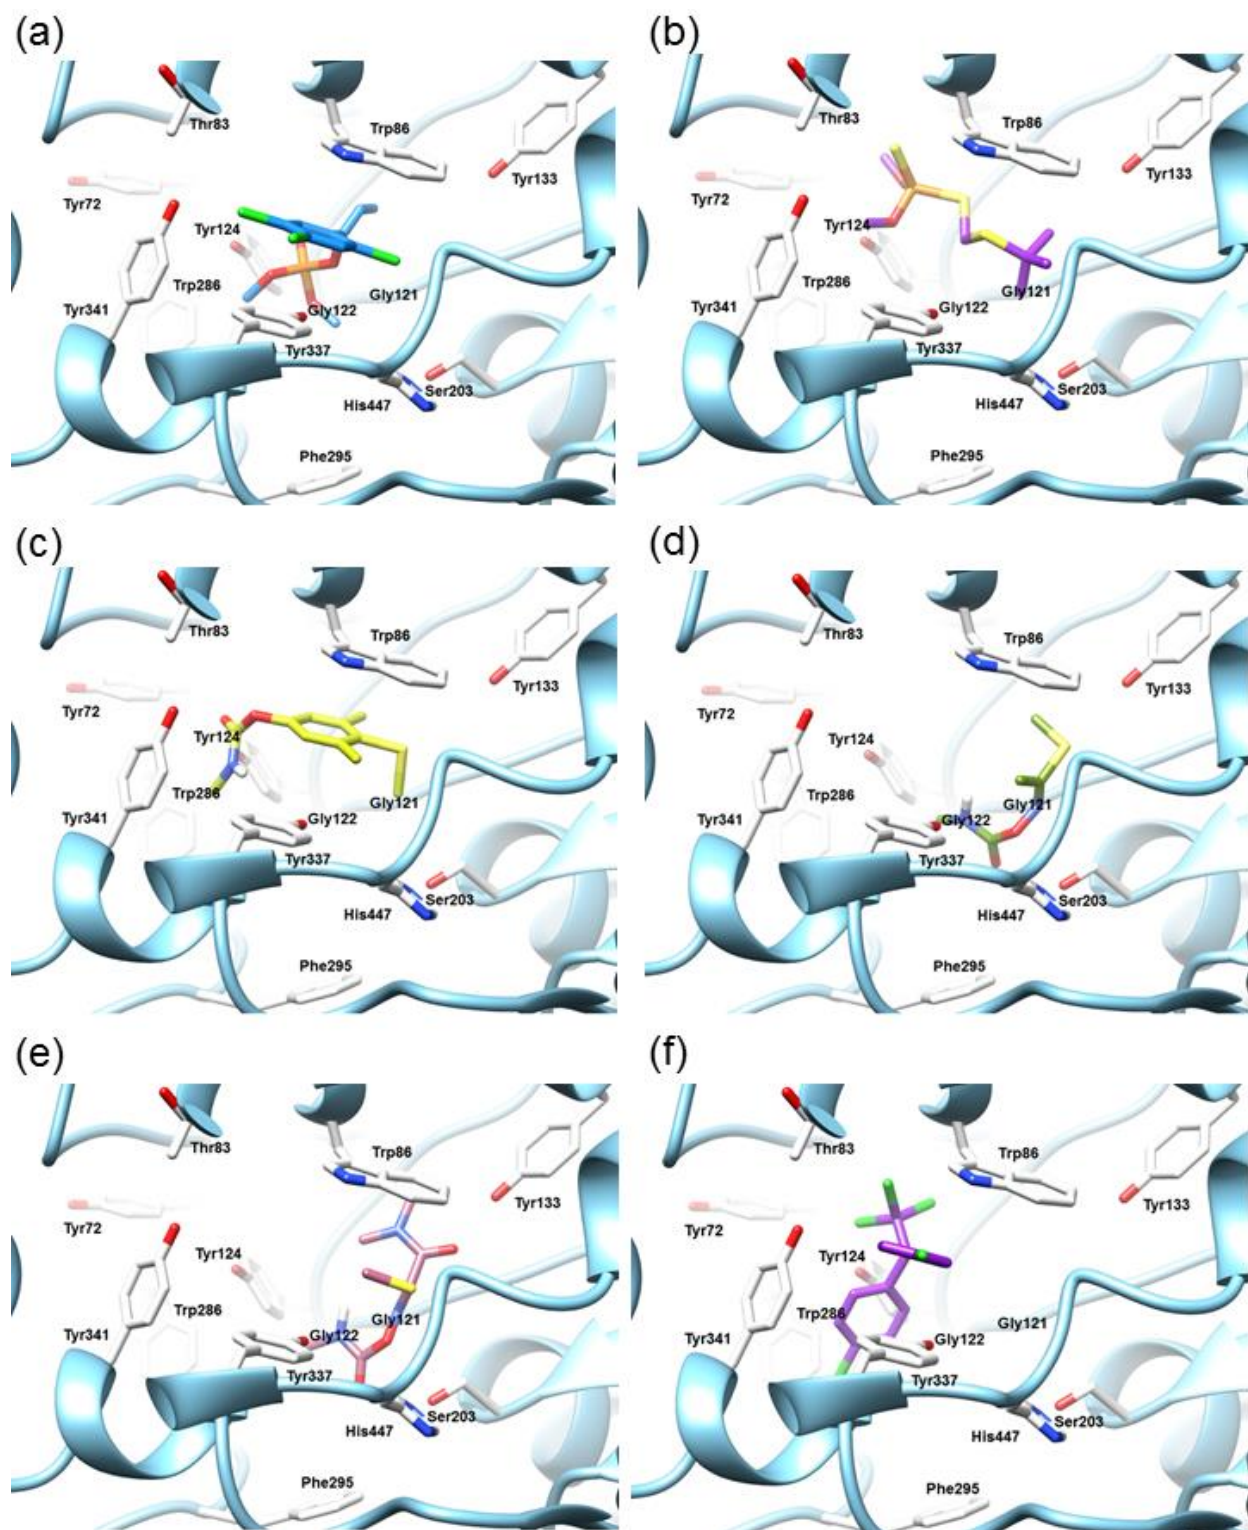

**Figure S37.** The SB alignment of TCVP (a), terbufos (b), methiocarb (c), methomyl (d), oxamyl (e), and DDT (f) into the *mAChE* active site. The enzyme ribbons are presented in blue, active site amino acids are depicted in white. For the clarity purpose, hydrogen atoms are omitted from presentation.

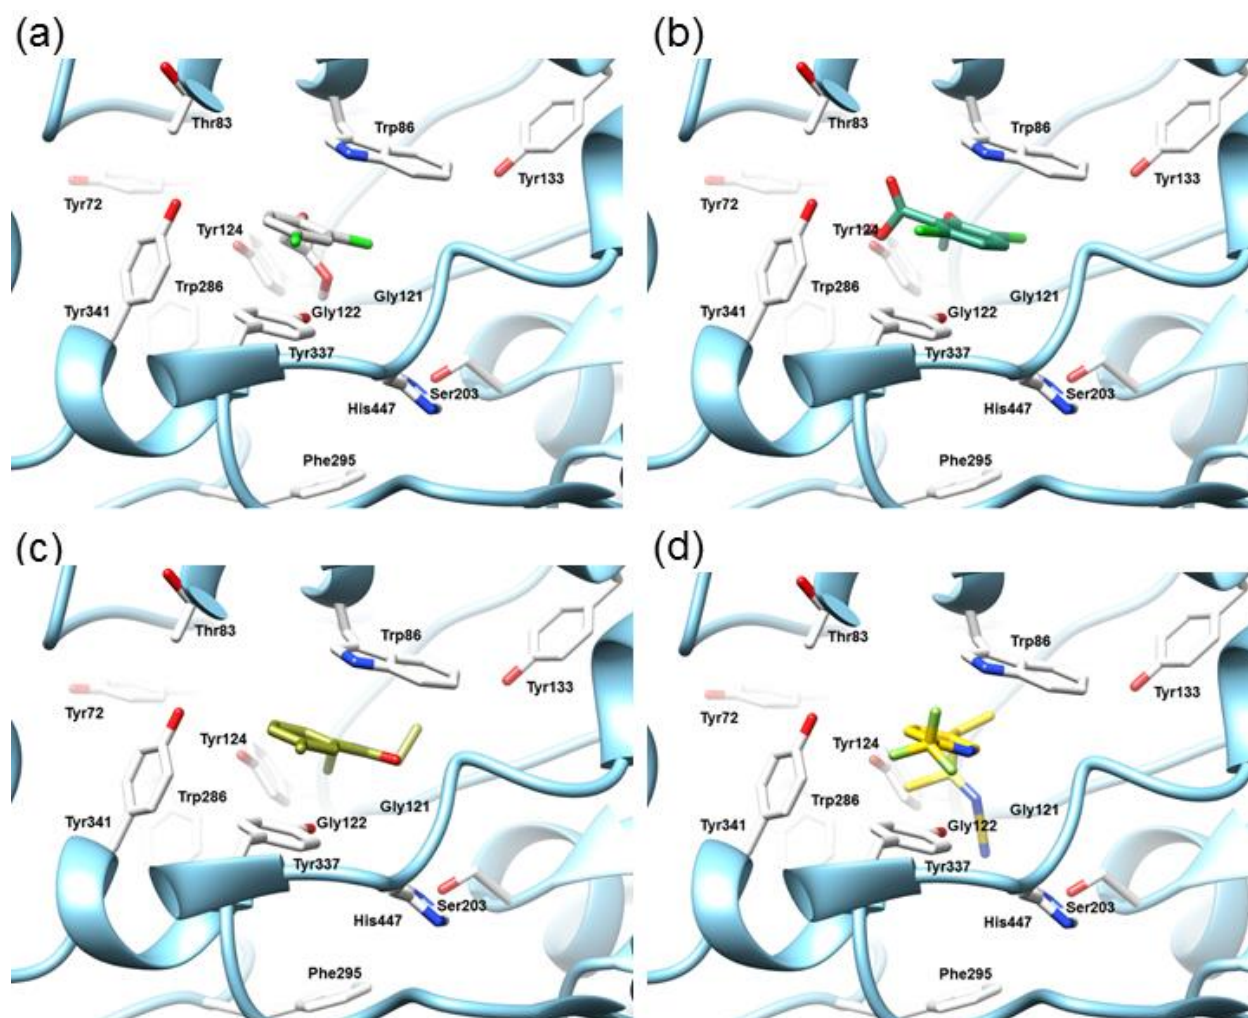

**Figure S38.** The SB alignment of 2,4-D (a), dicamba (b), DEET (c), and sulfoxaflor (d) into the *mAChE* active site. The enzyme ribbons are presented in blue, active site amino acids are depicted in white. For the clarity purpose, hydrogen atoms are omitted from presentation.

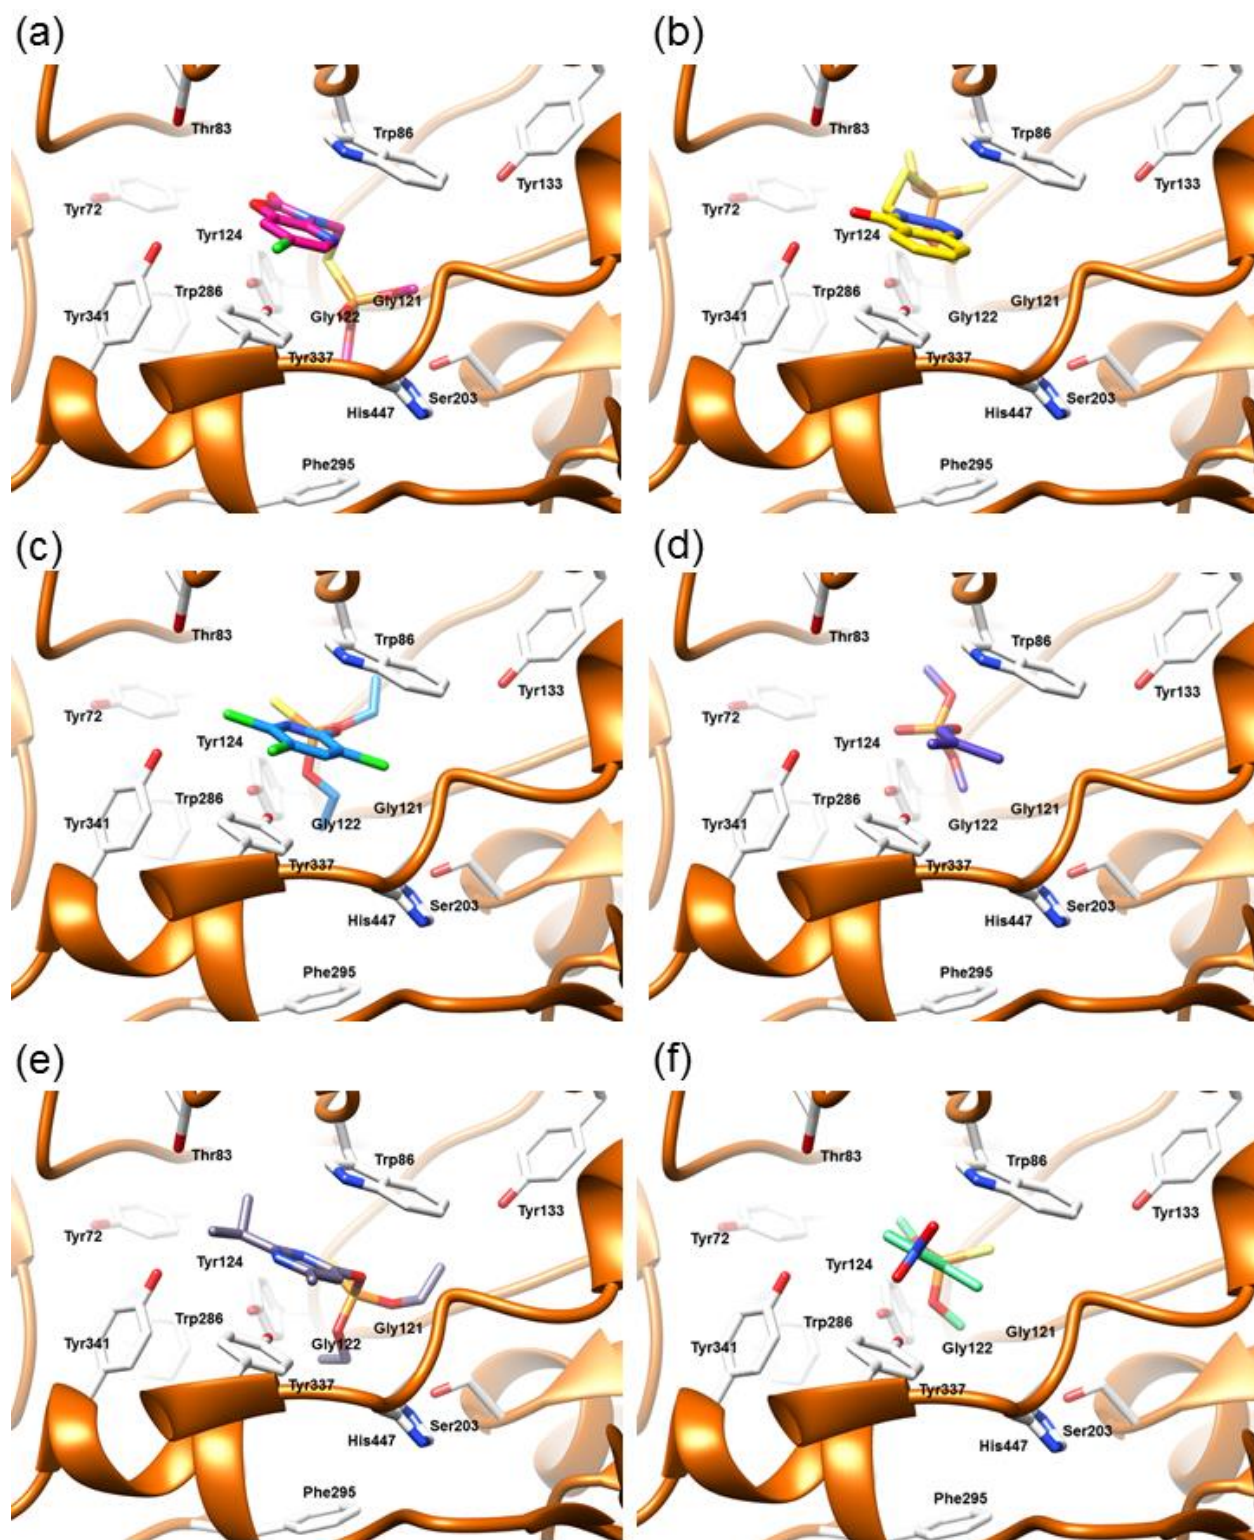

**Figure S39.** The SB alignment of azamethiphos (a), azinphos-methyl (b), chlorpyrifos (c), DDVP (d), diazinon (e), and fenitrothion (f), into the *hAChE* active site. The enzyme ribbons are presented in orange, active site amino acids are depicted in white. For the clarity purpose, hydrogen atoms are omitted from presentation.

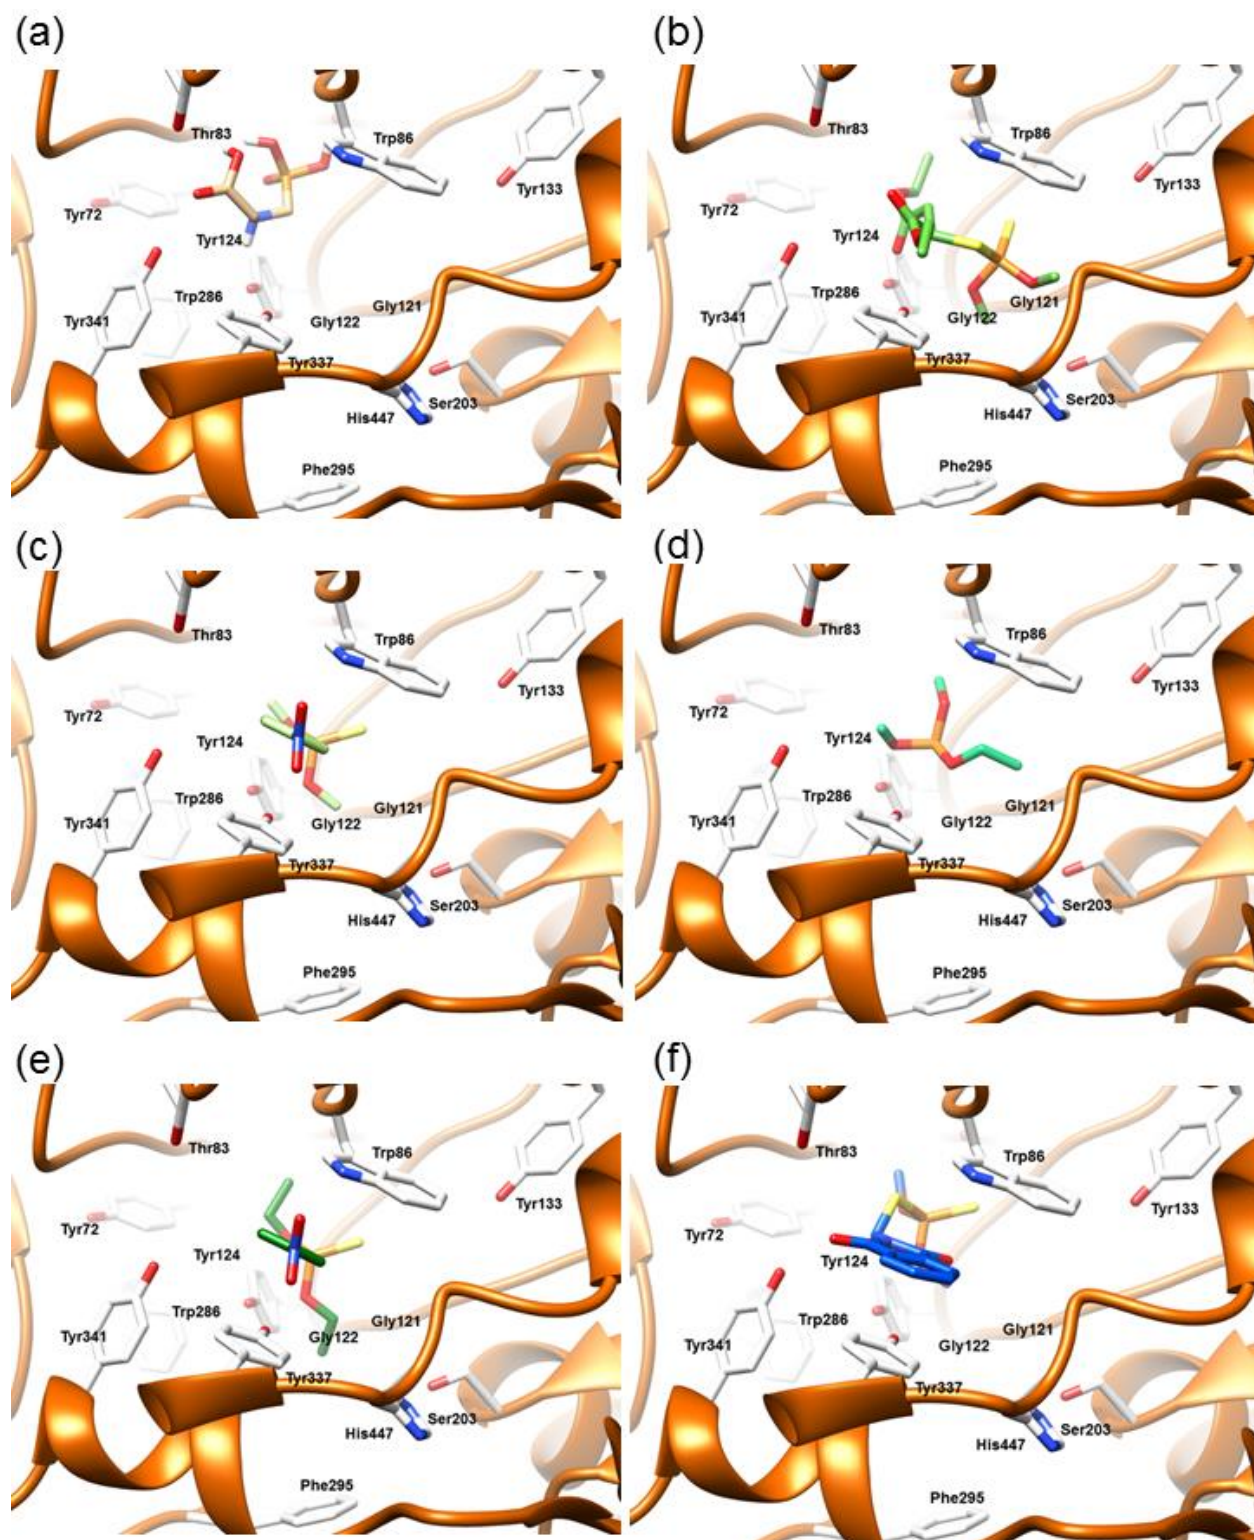

**Figure S40.** The SB alignment of glyphosate (a), malathion (b), methyl parathion (c), naled (dibrom) (d), parathion (e), and phosmet (f) into the *hAChE* active site. The enzyme ribbons are presented in orange, active site amino acids are depicted in white. For the clarity purpose, hydrogen atoms are omitted from presentation.

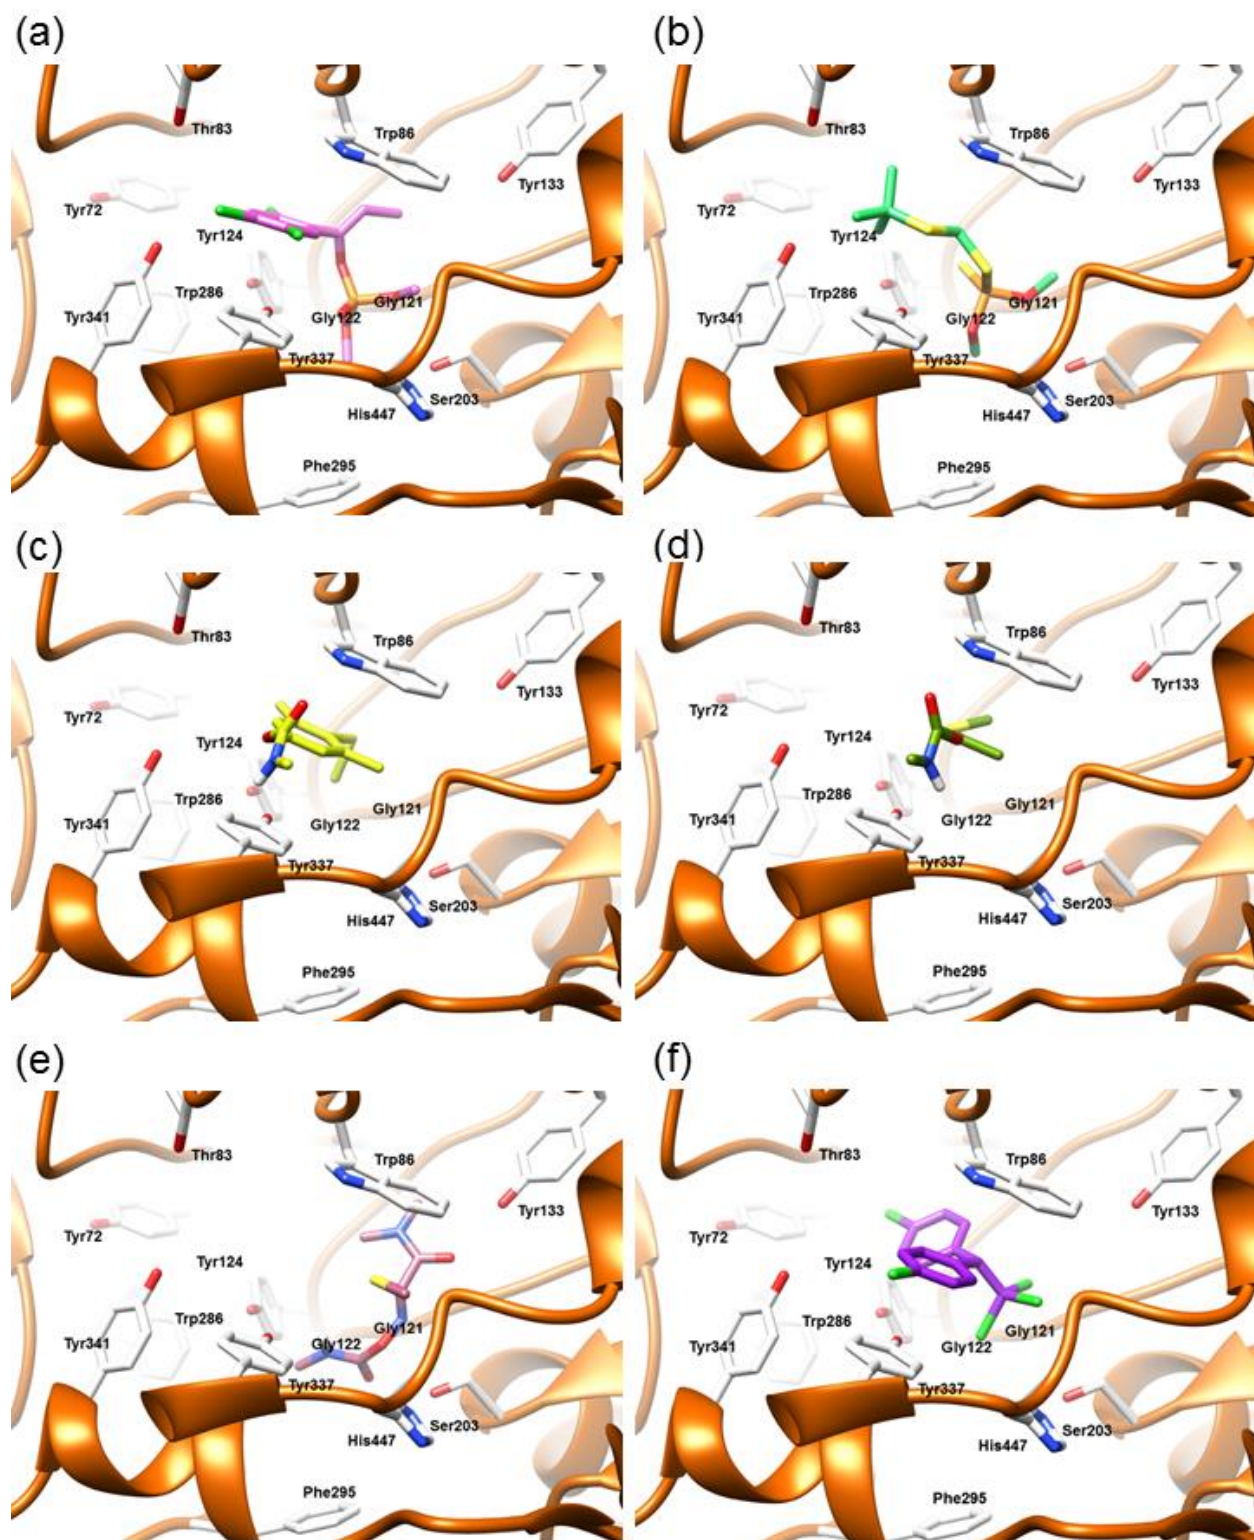

**Figure S41.** The SB alignment of TCVP (a), terbufos (b), methiocarb (c), methomyl (d), oxamyl (e), and DDT (f) into the *hAChE* active site. The enzyme ribbons are presented in blue, active site amino acids are depicted in white. For the clarity purpose, hydrogen atoms are omitted from presentation.

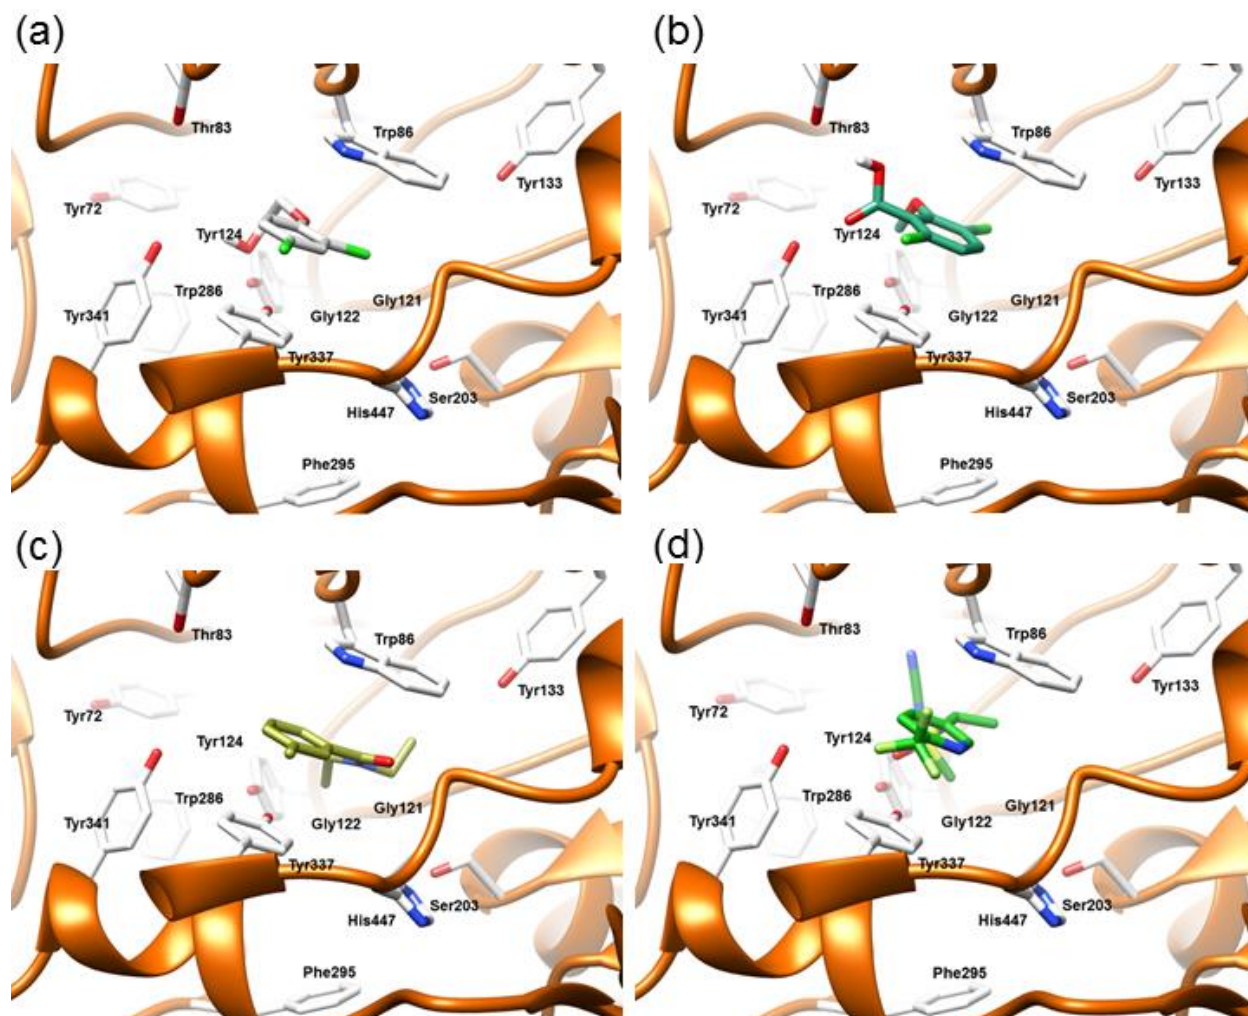

**Figure S42.** The SB alignment of 2,4-D (a), dicamba (b), DEET (c), and sulfoxaflor (d) into the *hAChE* active site. The enzyme ribbons are presented in orange, active site amino acids are depicted in white. For the clarity purpose, hydrogen atoms are omitted from presentation.

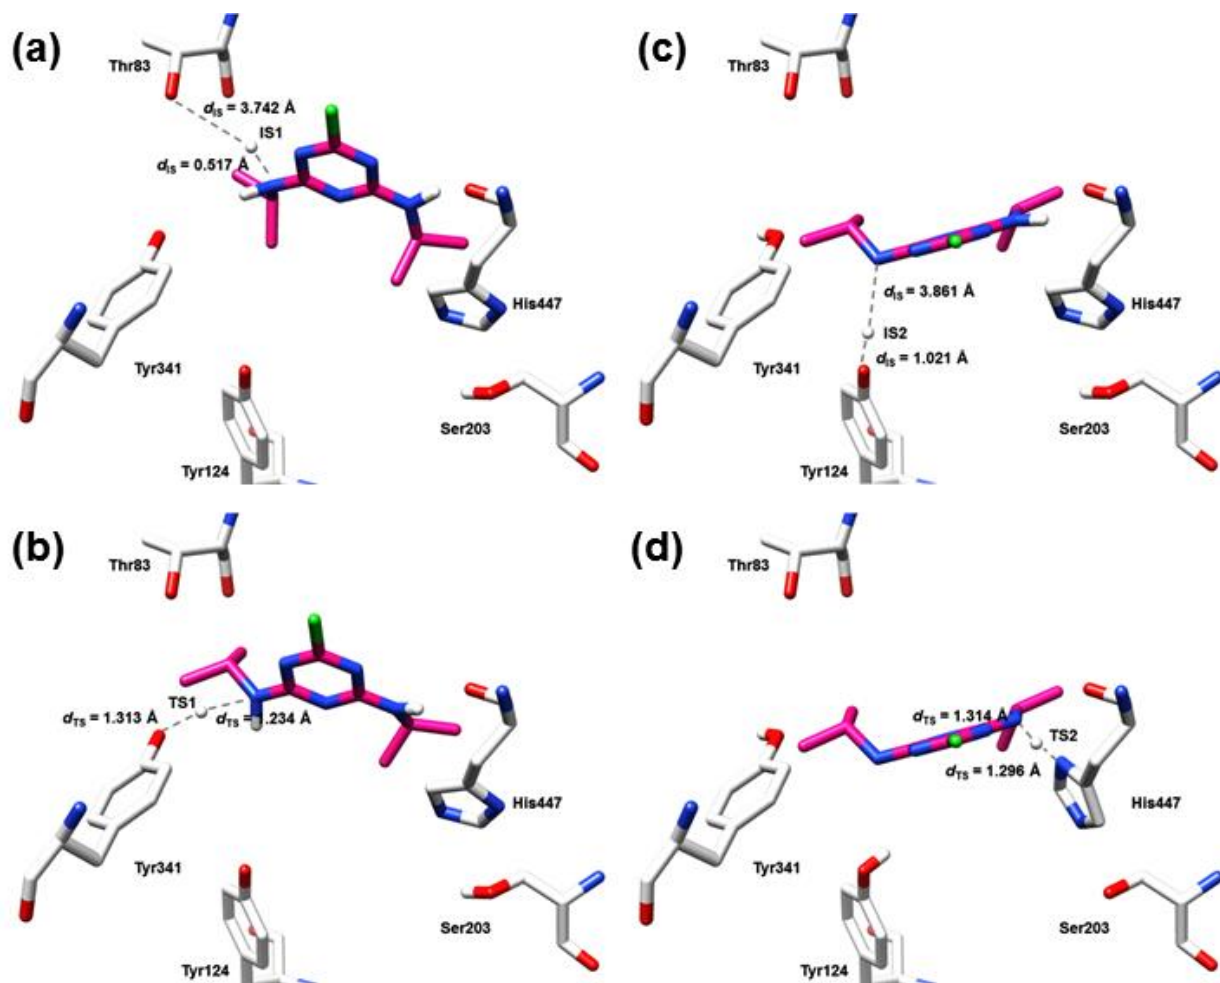

**Figure S43.** The quantum chemical mechanism of *Homo sapiens* acetylcholinesterase inhibition by propazine. The extracted geometry of IS1 (a); TS1 (b); IS2 (c); TS2 (d).



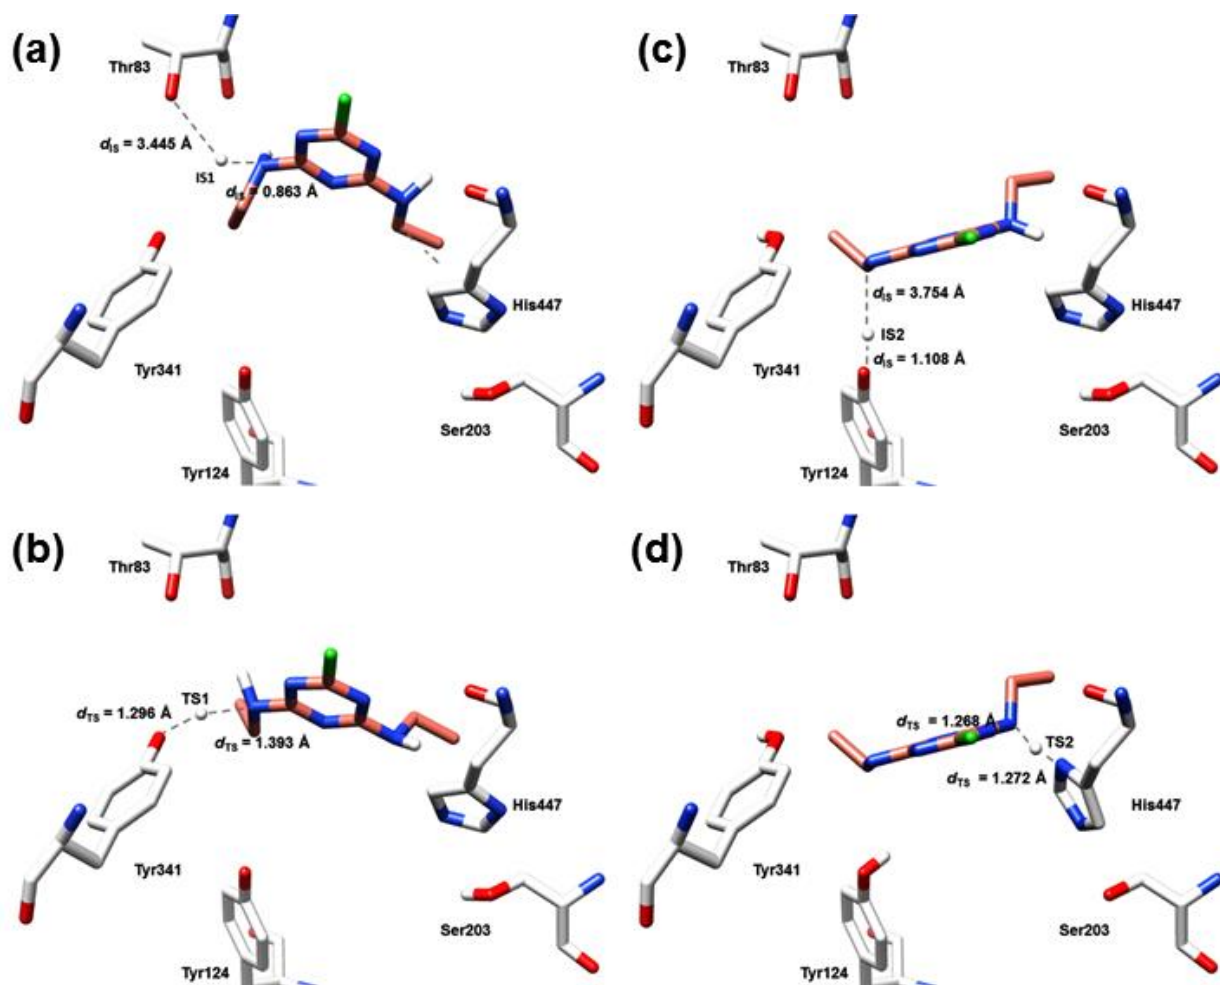

**Figure S44.** The quantum chemical mechanism of *Homo sapiens* acetylcholinesterase inhibition by simazine. The extracted geometry of IS1 (a); TS1 (b); IS2 (c); TS2 (d).

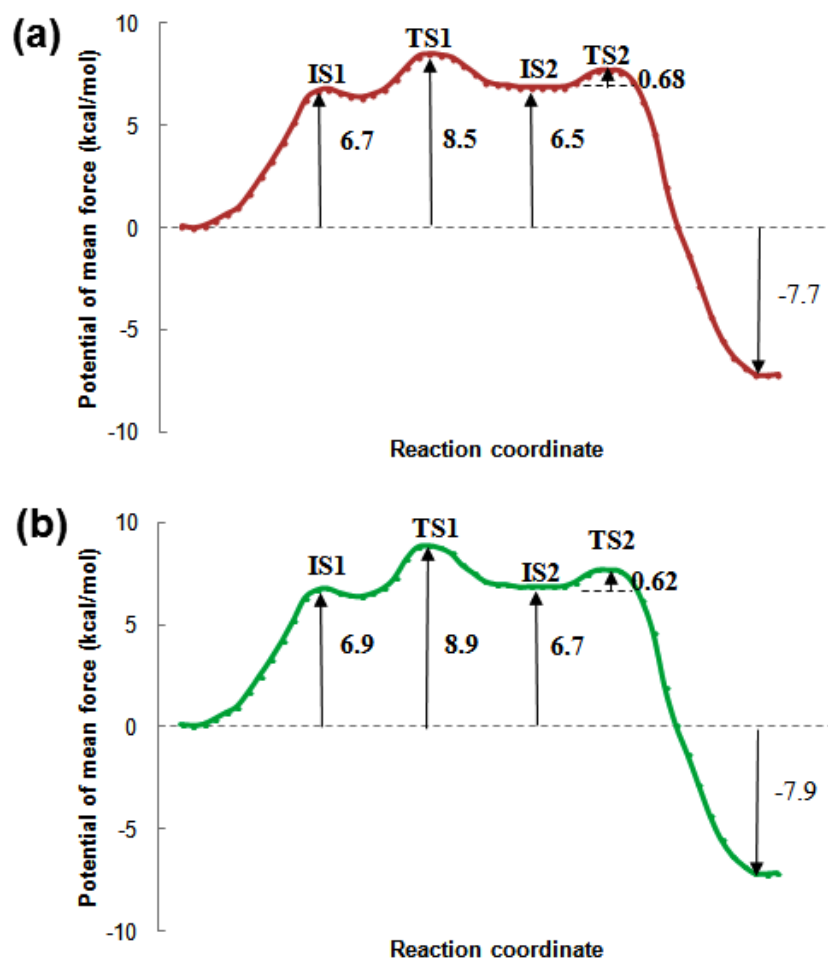

**Figure S45.** Free energy profile for *Homo sapiens* acetylcholinesterase inhibition by propazine (a) and simazine (b) by means of B3LYP (6-31G\*) QM simulations.

**Table S1.** Training set pesticides chemical structures, conformational analysis, superposition of generated global minima using various force fields.

| Pesticide                                                                                                 | FF <sup>a</sup> | $E_{\text{glob\_min}}^{\text{b}}$<br>(kJ/mol) | NGMS <sup>c</sup> | NF <sup>d</sup> | Pesticide<br>alignment <sup>e</sup>                                                  | FFDAA <sup>f</sup><br>RMSD (Å) <sup>g</sup> |
|-----------------------------------------------------------------------------------------------------------|-----------------|-----------------------------------------------|-------------------|-----------------|--------------------------------------------------------------------------------------|---------------------------------------------|
| <b>acetylcholine</b><br>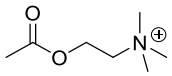 | MM3             | -924.67                                       | 41                | 3026            |    | MM3/MMFF                                    |
|                                                                                                           | AMBER 94        | NA <sup>h</sup>                               | NA                | NA              |                                                                                      | 1.086                                       |
|                                                                                                           | MMFF            | -992.47                                       | 45                | 3066            |                                                                                      | MM3/MMFFs                                   |
|                                                                                                           | MMFFs           | -979.02                                       | 497               | 4897            |                                                                                      | 1.703                                       |
|                                                                                                           | OPLSAA          | -773.90                                       | 888               | 2075            |                                                                                      | MM3/OPLSAA                                  |
| <hr/>                                                                                                     |                 |                                               |                   |                 |                                                                                      |                                             |
| <b>atrazine</b><br>     | MM3             | -1161.48                                      | 445               | 23              |   | MM3/MMFF                                    |
|                                                                                                           | AMBER 94        | NA                                            | NA                | NA              |                                                                                      | 0.892                                       |
|                                                                                                           | MMFF            | -1007.32                                      | 147               | 62              |                                                                                      | MM3/MMFFs                                   |
|                                                                                                           | MMFFs           | -992.63                                       | 509               | 20              |                                                                                      | 0.931                                       |
|                                                                                                           | OPLSAA          | -783.57                                       | 364               | 19              |                                                                                      | MM3/OPLSAA                                  |
| <hr/>                                                                                                     |                 |                                               |                   |                 |                                                                                      |                                             |
| <b>propazine</b><br>   | MM3             | -1154.42                                      | 445               | 4370            |  | MM3/MMFF                                    |
|                                                                                                           | AMBER 94        | NA                                            | NA                | NA              |                                                                                      | 6.346                                       |
|                                                                                                           | MMFF            | -992.47                                       | 34                | 3131            |                                                                                      | MM3/MMFFs                                   |
|                                                                                                           | MMFFs           | -979.02                                       | 577               | 4413            |                                                                                      | 6.077                                       |
|                                                                                                           | OPLSAA          | -773.9                                        | 877               | 2086            |                                                                                      | MM3/OPLSAA                                  |
| <hr/>                                                                                                     |                 |                                               |                   |                 |                                                                                      |                                             |
| <b>simazine</b><br>    | MM3             | NA                                            | NA                | NA              |  | MM3/MMFF                                    |
|                                                                                                           | AMBER 94        | NA                                            | NA                | NA              |                                                                                      | NA                                          |
|                                                                                                           | MMFF            | -1022.18                                      | 136               | 2782            |                                                                                      | MM3/MMFFs                                   |
|                                                                                                           | MMFFs           | NA                                            | NA                | NA              |                                                                                      | NA                                          |
|                                                                                                           | OPLSAA          | -793.61                                       | 158               | 2306            |                                                                                      | MM3/OPLSAA                                  |
| <hr/>                                                                                                     |                 |                                               |                   |                 |                                                                                      |                                             |
|                                                                                                           |                 |                                               |                   |                 |                                                                                      | NA                                          |
|                                                                                                           |                 |                                               |                   |                 |                                                                                      | MMFF/MMFFs                                  |

NA  
MMFF/OPLSAA  
2.109  
MMFFs/OPLSAA  
NA

---

<sup>a</sup>Force field; <sup>b</sup>Energy of the global minimum; <sup>c</sup>Number of times that a single global minimum structure was found in 10000 processed structures; <sup>d</sup>Number of families *i.e.* different conformations found in 10000 processed structures; <sup>e</sup>Red - experimental conformation, Violet - MMFF conformation, Blue – MMFFs conformation, Green - OPLSAA conformation; <sup>f</sup>Force field dependent alignment accuracy; <sup>g</sup>RMSD measured between the heavy atoms of pesticides experimental and best performing force field conformations; <sup>h</sup>Not Available.

**Table S2.** Training set pesticides chemical structures, conformational analysis, superposition of generated global minima using various force fields.

| Pesticide                                                                                                  | FF <sup>a</sup> | $E_{\text{glob\_min}}^b$<br>(kJ/mol) | NGMS <sup>c</sup> | NF <sup>d</sup> | Pesticide<br>alignment <sup>e</sup>                                                   | FFDAA <sup>f</sup><br>RMSD (Å) <sup>g</sup> |
|------------------------------------------------------------------------------------------------------------|-----------------|--------------------------------------|-------------------|-----------------|---------------------------------------------------------------------------------------|---------------------------------------------|
| <b>carbofuran</b><br>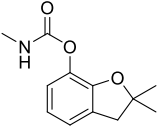     | MM3             | 29.60                                | 3617              | 2               |    | MM3/MMFF                                    |
|                                                                                                            | AMBER 94        | NA <sup>h</sup>                      | NA                | NA              |                                                                                       | NA                                          |
|                                                                                                            | MMFF            | 20.30                                | 3307              | 2               |                                                                                       | MM3/MMFFs                                   |
|                                                                                                            | MMFFs           | 15.92                                | 3384              | 2               |                                                                                       | NA                                          |
|                                                                                                            | OPLSAA          | 73.27                                | 5621              | 75              |                                                                                       | MM3/OPLSAA                                  |
|                                                                                                            |                 |                                      |                   |                 | NA                                                                                    |                                             |
|                                                                                                            |                 |                                      |                   |                 | MMFF/MMFFs                                                                            |                                             |
|                                                                                                            |                 |                                      |                   |                 | NA                                                                                    |                                             |
|                                                                                                            |                 |                                      |                   |                 | MMFF/OPLSAA                                                                           |                                             |
|                                                                                                            |                 |                                      |                   |                 | 2.109                                                                                 |                                             |
|                                                                                                            |                 |                                      |                   |                 | MMFFs/OPLSAA                                                                          |                                             |
|                                                                                                            |                 |                                      |                   |                 | NA                                                                                    |                                             |
| <b>monocrotophos</b><br> | MM3             | NA                                   | NA                | NA              |    | MM3/MMFF                                    |
|                                                                                                            | AMBER 94        | NA                                   | NA                | NA              |                                                                                       | NA                                          |
|                                                                                                            | MMFF            | -307.36                              | 241               | 62              |                                                                                       | MM3/MMFFs                                   |
|                                                                                                            | MMFFs           | -310.26                              | 218               | 61              |                                                                                       | NA                                          |
|                                                                                                            | OPLSAA          | NA                                   | NA                | NA              |                                                                                       | MM3/OPLSAA                                  |
|                                                                                                            |                 |                                      |                   |                 | NA                                                                                    |                                             |
|                                                                                                            |                 |                                      |                   |                 | MMFF/MMFFs                                                                            |                                             |
|                                                                                                            |                 |                                      |                   |                 | 3.419                                                                                 |                                             |
|                                                                                                            |                 |                                      |                   |                 | MMFF/OPLSAA                                                                           |                                             |
|                                                                                                            |                 |                                      |                   |                 | NA                                                                                    |                                             |
|                                                                                                            |                 |                                      |                   |                 | MMFFs/OPLSAA                                                                          |                                             |
|                                                                                                            |                 |                                      |                   |                 | NA                                                                                    |                                             |
| <b>dimethoate</b><br>   | MM3             | NA                                   | NA                | NA              |  | MM3/MMFF                                    |
|                                                                                                            | AMBER 94        | NA                                   | NA                | NA              |                                                                                       | NA                                          |
|                                                                                                            | MMFF            | -383.68                              | 340               | 44              |                                                                                       | MM3/MMFFs                                   |
|                                                                                                            | MMFFs           | -386.71                              | 215               | 40              |                                                                                       | NA                                          |
|                                                                                                            | OPLSAA          | -228.66                              | 998               | 15              |                                                                                       | MM3/OPLSAA                                  |
|                                                                                                            |                 |                                      |                   |                 | NA                                                                                    |                                             |
|                                                                                                            |                 |                                      |                   |                 | MMFF/MMFFs                                                                            |                                             |
|                                                                                                            |                 |                                      |                   |                 | 3.347                                                                                 |                                             |
|                                                                                                            |                 |                                      |                   |                 | MMFF/OPLSAA                                                                           |                                             |
|                                                                                                            |                 |                                      |                   |                 | 1.724                                                                                 |                                             |
|                                                                                                            |                 |                                      |                   |                 | MMFFs/OPLSAA                                                                          |                                             |
|                                                                                                            |                 |                                      |                   |                 | 3.328                                                                                 |                                             |
| <b>carbaryl</b><br>     | MM3             | -0.88                                | 10000             | 1               |  | MM3/MMFF                                    |
|                                                                                                            | AMBER 94        | NA                                   | NA                | NA              |                                                                                       | 2.019                                       |
|                                                                                                            | MMFF            | 20.43                                | 10000             | 1               |                                                                                       | MM3/MMFFs                                   |
|                                                                                                            | MMFFs           | 15.66                                | 10000             | 1               |                                                                                       | 2.022                                       |
|                                                                                                            | OPLSAA          | 59.34                                | 9986              | 1               |                                                                                       | MM3/OPLSAA                                  |
|                                                                                                            |                 |                                      |                   |                 | 0.454                                                                                 |                                             |
|                                                                                                            |                 |                                      |                   |                 | MMFF/MMFFs                                                                            |                                             |

0.088  
MMFF/OPLSAA  
1.957  
MMFFs/OPLSAA  
2.514

| <hr/>                                                                              |          |        |      |              |             |
|------------------------------------------------------------------------------------|----------|--------|------|--------------|-------------|
| <b>tebufenozide</b>                                                                | MM3      | NA     | NA   | NA           | MM3/MMFF    |
|                                                                                    | AMBER 94 | NA     | NA   | NA           | NA          |
|                                                                                    | MMFF     | 467.38 | 1759 | 4            | MM3/MMFFs   |
|                                                                                    | MMFFs    | 470.26 | 1799 | 4            | NA          |
|                                                                                    | OPLSAA   | 13.33  | 1474 | 8            | MM3/OPLSAA  |
| 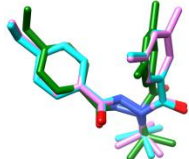 |          |        |      |              | NA          |
|                                                                                    |          |        |      |              | MMFF/MMFFs  |
|                                                                                    |          |        |      |              | 0.370       |
|                                                                                    |          |        |      |              | MMFF/OPLSAA |
|                                                                                    |          |        |      |              | 2.769       |
|                                                                                    |          |        |      | MMFFs/OPLSAA |             |
|                                                                                    |          |        |      | 2.686        |             |

<sup>a</sup>Force field; <sup>b</sup>Energy of the global minimum; <sup>c</sup>Number of times that a single global minimum structure was found in 10000 processed structures; <sup>d</sup>Number of families *i.e.* different conformations found in 10000 processed structures; <sup>e</sup>Red - experimental conformation, Violet - MMFF conformation, Blue – MMFFs conformation, Green - OPLSAA conformation; <sup>f</sup>Force field dependent alignment accuracy; <sup>g</sup>RMSD measured between the heavy atoms of pesticides experimental and best performing force field conformations; <sup>h</sup>Not Available.

**Table S3.** Training set pesticides chemical structures, conformational analysis, superposition of generated global minima using various force fields.

| Pesticide                                                                                                | FF <sup>a</sup> | $E_{\text{glob\_min}}^{\text{b}}$<br>(kJ/mol) | NGMS <sup>c</sup> | NF <sup>d</sup> | Pesticide<br>alignment <sup>e</sup>                                                  | FFDAA <sup>f</sup><br>RMSD (Å) <sup>g</sup> |
|----------------------------------------------------------------------------------------------------------|-----------------|-----------------------------------------------|-------------------|-----------------|--------------------------------------------------------------------------------------|---------------------------------------------|
| <b>imidacloprid</b><br>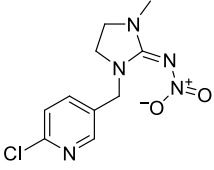 | MM3             | NA <sup>h</sup>                               | NA                | NA              |    | MM3/MMFF                                    |
|                                                                                                          | AMBER 94        | NA                                            | NA                | NA              |                                                                                      | NA                                          |
|                                                                                                          | MMFF            | -168.00                                       | 1027              | 5               |                                                                                      | MM3/MMFFs                                   |
|                                                                                                          | MMFFs           | -165.41                                       | 3643              | 3               |                                                                                      | NA                                          |
|                                                                                                          | OPLSAA          | 90.86                                         | 365               | 23              |                                                                                      | MM3/OPLSAA                                  |
|                                                                                                          |                 |                                               |                   |                 | NA                                                                                   |                                             |
|                                                                                                          |                 |                                               |                   |                 | MMFF/MMFFs                                                                           | 0.122                                       |
|                                                                                                          |                 |                                               |                   |                 | MMFF/OPLSAA                                                                          | 3.282                                       |
|                                                                                                          |                 |                                               |                   |                 | MMFFs/OPLSAA                                                                         | 3.277                                       |
| <b>acetamiprid</b><br> | MM3             | NA                                            | NA                | NA              |   | MM3/MMFF                                    |
|                                                                                                          | AMBER 94        | NA                                            | NA                | NA              |                                                                                      | NA                                          |
|                                                                                                          | MMFF            | -31.45                                        | 1916              | 14              |                                                                                      | MM3/MMFFs                                   |
|                                                                                                          | MMFFs           | -31.29                                        | 1816              | 6               |                                                                                      | NA                                          |
|                                                                                                          | OPLSAA          | NA                                            | NA                | NA              |                                                                                      | MM3/OPLSAA                                  |
|                                                                                                          |                 |                                               |                   |                 | NA                                                                                   |                                             |
|                                                                                                          |                 |                                               |                   |                 | MMFF/MMFFs                                                                           | 0.041                                       |
|                                                                                                          |                 |                                               |                   |                 | MMFF/OPLSAA                                                                          | NA                                          |
|                                                                                                          |                 |                                               |                   |                 | MMFFs/OPLSAA                                                                         | NA                                          |
| <b>diuron</b><br>     | MM3             | -37.27                                        | 3108              | 2               |  | MM3/MMFF                                    |
|                                                                                                          | AMBER 94        | NA                                            | NA                | NA              |                                                                                      | 1.886                                       |
|                                                                                                          | MMFF            | -142.96                                       | 2537              | 2               |                                                                                      | MM3/MMFFs                                   |
|                                                                                                          | MMFFs           | -140.51                                       | 2523              | 2               |                                                                                      | 1.882                                       |
|                                                                                                          | OPLSAA          | -3.52                                         | 2908              | 2               |                                                                                      | MM3/OPLSAA                                  |
|                                                                                                          |                 |                                               |                   |                 | 1.899                                                                                |                                             |
|                                                                                                          |                 |                                               |                   |                 | MMFF/MMFFs                                                                           | 0.121                                       |
|                                                                                                          |                 |                                               |                   |                 | MMFF/OPLSAA                                                                          | 0.399                                       |
|                                                                                                          |                 |                                               |                   |                 | MMFFs/OPLSAA                                                                         | 0.330                                       |
| <b>monuron</b><br>    | MM3             | -76.13                                        | 10000             | 1               |  | MM3/MMFF                                    |
|                                                                                                          | AMBER 94        | NA                                            | NA                | NA              |                                                                                      | 0.533                                       |
|                                                                                                          | MMFF            | -197.63                                       | 10000             | 1               |                                                                                      | MM3/MMFFs                                   |
|                                                                                                          | MMFFs           | -199.43                                       | 10000             | 1               |                                                                                      | 2.004                                       |
|                                                                                                          | OPLSAA          | -74.72                                        | 7691              | 2               |                                                                                      | MM3/OPLSAA                                  |
|                                                                                                          |                 |                                               |                   |                 | 2.629                                                                                |                                             |
|                                                                                                          |                 |                                               |                   |                 | MMFF/MMFFs                                                                           |                                             |

2.049  
MMFF/ OPLSAA  
2.695  
MMFFs/OPLSAA  
2.032

**linuron**

|          |         |     |      |
|----------|---------|-----|------|
| MM3      | NA      | NA  | NA   |
| AMBER 94 | NA      | NA  | NA   |
| MMFF     | -992.47 | 45  | 3066 |
| MMFFs    | -979.02 | 497 | 4897 |
| OPLSAA   | -773.90 | 888 | 2075 |

MM3/MMFF  
3.597  
MM3/MMFFs  
3.574  
MM3/OPLSAA  
2.951  
MMFF/MMFFs  
0.523  
MMFF/OPLSAA  
1.833  
MMFFs/OPLSAA  
1.889

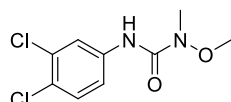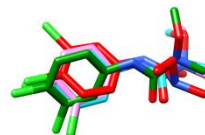

<sup>a</sup>Force field; <sup>b</sup>Energy of the global minimum; <sup>c</sup>Number of times that a single global minimum structure was found in 10000 processed structures; <sup>d</sup>Number of families *i.e.* different conformations found in 10000 processed structures; <sup>e</sup>Red - experimental conformation, Violet - MMFF conformation, Blue - MMFFs conformation, Green - OPLSAA conformation; <sup>f</sup>Force field dependent alignment accuracy; <sup>g</sup>RMSD measured between the heavy atoms of pesticides experimental and best performing force field conformations; <sup>h</sup>Not Available.



**Table S4.** Test set pesticides chemical structures and obtained global minima using MMFF as the best performing force field.

| Pesticide                                                                                                      | $E_{\text{glob\_min}}^a$<br>(kJ/mol) | Conformation                                                                        | Pesticide                                                                                                 | $E_{\text{glob\_min}}^a$<br>(kJ/mol) | Conformation                                                                          |
|----------------------------------------------------------------------------------------------------------------|--------------------------------------|-------------------------------------------------------------------------------------|-----------------------------------------------------------------------------------------------------------|--------------------------------------|---------------------------------------------------------------------------------------|
| <b>azamethiphos</b><br>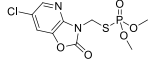       | -561.48                              |    | <b>phosmet</b><br>       | -549.21                              |    |
| <b>azinphos-methyl</b><br>    | -361.00                              |    | <b>TCVP</b><br>          | -130.74                              |    |
| <b>chlorpyrifos</b><br>       | -247.37                              |    | <b>terbufos</b><br>      | -382.19                              |    |
| <b>DDVP</b><br>               | -214.58                              |    | <b>methiocarb</b><br>    | -75.96                               |    |
| <b>diazinon</b><br>           | -274.36                              |   | <b>methomyl</b><br>      | -72.25                               |    |
| <b>fenitrothion</b><br>     | -45.79                               |  | <b>oxamyl</b><br>      | 118.32                               |  |
| <b>glyphosate</b><br>       | -221.48                              |  | <b>DDT</b><br>         | 352.49                               |  |
| <b>malathion</b><br>        | -498.14                              |  | <b>2,4-D</b><br>       | 28.66                                |  |
| <b>methyl parathion</b><br> | -74.64                               |  | <b>dicamba</b><br>     | 63.27                                |  |
| <b>naled (dibrom)</b><br>   | -337.18                              |  | <b>DEET</b><br>        | 70.17                                |  |
| <b>parathion</b><br>        | -90.35                               |  | <b>sulfoxaflor</b><br> | 178.42                               |  |

<sup>a</sup> $E_{\text{global\_minimum}}$

**Table S5.** Linear regression parameters for QSAR model 2 (acute toxicity against *Mus musculus*).

| Compound      | LD <sub>50</sub><br>(mg/kg) | MW     | $E_{glob\_min}$<br>MMFF<br>(kJ/mol) | Exp. pLD <sub>50</sub> | Fitted pLD <sub>50</sub> |
|---------------|-----------------------------|--------|-------------------------------------|------------------------|--------------------------|
| atrazine      | 0.85                        | 215.69 | -1007.3                             | 5.40                   | 4.28                     |
| propazin      | 3.18                        | 229.71 | -992.47                             | 4.86                   | 4.26                     |
| simazine      | 5                           | 201.66 | -1022.2                             | 4.61                   | 4.30                     |
| carbofuran    | 2                           | 221.11 | 20.3                                | 5.04                   | 3.09                     |
| monocrotophos | 14                          | 223.16 | -307.36                             | 4.20                   | 3.47                     |
| dimethoate    | 60                          | 229.25 | -383.68                             | 3.58                   | 3.56                     |
| carbaryl      | 100                         | 201.22 | 20.43                               | 3.30                   | 3.09                     |
| tebufenozide  | 5000                        | 352.48 | 467.38                              | 1.85                   | 2.58                     |
| imidacloprid  | 131                         | 269.69 | -168                                | 3.31                   | 3.31                     |
| acetamiprid   | 184                         | 221.69 | -31.45                              | 3.08                   | 3.15                     |
| diuron        | 500                         | 233.09 | -142.96                             | 2.67                   | 3.28                     |
| monuron       | 1700                        | 198.65 | -197.63                             | 2.07                   | 3.35                     |
| linuron       | 2400                        | 249.09 | -992.47                             | 2.02                   | 4.26                     |

**Table S6.** External validation of QSAR model 2 (acute toxicity against *Mus musculus*).

| Compound         | LD <sub>50</sub><br>(mg/kg) | MW     | $E_{glob\_min}$<br>MMFF<br>(kJ/mol) | Exp. pLD <sub>50</sub> | Fitted pLD <sub>50</sub> |
|------------------|-----------------------------|--------|-------------------------------------|------------------------|--------------------------|
| azamethiphos     | 1040.00                     | 324.68 | -561.48                             | 4.07                   | 1.98                     |
| azinphos-methyl  | 7.00                        | 317.32 | -361.00                             | 6.25                   | 2.36                     |
| chlorpyrifos     | 2000.00                     | 350.59 | -247.37                             | 3.79                   | 2.58                     |
| DDVP             | 17.00                       | 220.98 | -214.58                             | 5.86                   | 2.64                     |
| diazinon         | 66.00                       | 304.35 | -274.36                             | 5.27                   | 2.53                     |
| fenitrothion     | 500.00                      | 277.23 | -45.79                              | 4.39                   | 2.96                     |
| glyphosate       | 5000.00                     | 169.07 | -221.48                             | 3.39                   | 2.63                     |
| malathion        | 290.00                      | 330.36 | -498.14                             | 4.63                   | 2.10                     |
| methyl parathion | 18.00                       | 263.21 | -74.64                              | 5.84                   | 2.91                     |
| naled (dibrom)   | 160.00                      | 380.78 | -337.18                             | 4.89                   | 2.41                     |
| parathion        | 2.00                        | 291.26 | -90.35                              | 6.79                   | 2.88                     |
| phosmet          | 113.00                      | 317.32 | -549.21                             | 5.04                   | 2.01                     |
| TCVP             | 465.00                      | 365.96 | -130.74                             | 4.42                   | 2.80                     |
| terbufos         | 1.60                        | 288.43 | -382.19                             | 6.89                   | 2.32                     |
| methiocarb       | 350.00                      | 225.31 | -75.96                              | 4.55                   | 2.91                     |
| methomyl         | 12.00                       | 162.21 | -72.25                              | 6.01                   | 2.91                     |
| oxamyl           | 5.40                        | 219.26 | 118.32                              | 6.36                   | 3.27                     |
| DDT              | 113.00                      | 354.49 | 352.49                              | 5.04                   | 3.72                     |
| 2,4-D            | 639.00                      | 221.04 | 28.66                               | 4.29                   | 3.10                     |
| dicamba          | 757.00                      | 221.04 | 63.27                               | 4.21                   | 3.17                     |
| DEET             | 1.95                        | 191.27 | 70.17                               | 6.80                   | 3.18                     |
| sulfoxaflor      | 750.00                      | 277.27 | 178.42                              | 4.22                   | 3.39                     |

**Table S7.** Linear regression parameters for QSAR model 4 (acute toxicity against *Homo sapiens*).

| Compound      | LD <sub>50</sub><br>(mg/kg) | MW     | $E_{\text{glob\_min}}$<br>MMFF<br>(kJ/mol) | Calculated pLD <sub>50</sub> | Fitted pLD <sub>50</sub> |
|---------------|-----------------------------|--------|--------------------------------------------|------------------------------|--------------------------|
| atrazine      | 0.07                        | 215.69 | -1007.30                                   | 6.50                         | 5.52                     |
| propazin      | 0.26                        | 229.71 | -992.47                                    | 5.95                         | 5.21                     |
| simazine      | 0.41                        | 201.66 | -1022.20                                   | 5.70                         | 4.74                     |
| carbofuran    | 0.16                        | 221.11 | 20.30                                      | 6.14                         | 5.13                     |
| monocrotophos | 1.14                        | 223.16 | -307.36                                    | 5.29                         | 4.34                     |
| dimethoate    | 4.86                        | 229.25 | -383.68                                    | 4.67                         | 4.10                     |
| carbaryl      | 8.11                        | 201.22 | 20.43                                      | 4.39                         | 3.71                     |
| tebufenozide  | 405.40                      | 352.48 | 467.38                                     | 2.94                         | 1.98                     |
| imidacloprid  | 10.62                       | 269.69 | -168.00                                    | 4.40                         | 3.95                     |
| acetamiprid   | 14.92                       | 221.69 | -31.45                                     | 4.17                         | 3.63                     |
| diuron        | 40.54                       | 233.09 | -142.96                                    | 3.76                         | 3.00                     |
| monuron       | 137.84                      | 198.65 | -197.63                                    | 3.16                         | 2.84                     |
| linuron       | 194.59                      | 249.09 | -992.47                                    | 3.11                         | 2.21                     |

**Table S8.** External validation of QSAR model 4 (acute toxicity against *Homo sapiens*).

| Compound         | LD <sub>50</sub><br>(mg/kg) | MW     | $E_{\text{glob\_min}}$<br>MMFF<br>(kJ/mol) | Calculated pLD <sub>50</sub> | Fitted pLD <sub>50</sub> |
|------------------|-----------------------------|--------|--------------------------------------------|------------------------------|--------------------------|
| azamethiphos     | 1040.00                     | 324.68 | -561.48                                    | 2.49                         | 4.10                     |
| azinphos-methyl  | 7.00                        | 317.32 | -361.00                                    | 4.66                         | 4.62                     |
| chlorpyrifos     | 2000.00                     | 350.59 | -247.37                                    | 2.24                         | 3.48                     |
| DDVP             | 17.00                       | 220.98 | -214.58                                    | 4.11                         | 4.02                     |
| diazinon         | 66.00                       | 304.35 | -274.36                                    | 3.66                         | 4.03                     |
| fenitrothion     | 500.00                      | 277.23 | -45.79                                     | 2.74                         | 4.57                     |
| glyphosate       | 5000.00                     | 169.07 | -221.48                                    | 1.53                         | 5.10                     |
| malathion        | 290.00                      | 330.36 | -498.14                                    | 3.06                         | 4.29                     |
| methyl parathion | 18.00                       | 263.21 | -74.64                                     | 4.17                         | 4.79                     |
| naled (dibrom)   | 160.00                      | 380.78 | -337.18                                    | 3.38                         | 3.81                     |
| parathion        | 2.00                        | 291.26 | -90.35                                     | 5.16                         | 4.40                     |
| phosmet          | 113.00                      | 317.32 | -549.21                                    | 3.45                         | 4.32                     |
| TCVP             | 465.00                      | 365.96 | -130.74                                    | 2.90                         | 4.29                     |
| terbufos         | 1.60                        | 288.43 | -382.19                                    | 5.26                         | 4.67                     |
| methiocarb       | 350.00                      | 225.31 | -75.96                                     | 2.81                         | 4.56                     |
| methomyl         | 12.00                       | 162.21 | -72.25                                     | 4.13                         | 5.19                     |
| oxamyl           | 5.40                        | 219.26 | 118.32                                     | 4.61                         | 4.24                     |
| DDT              | 113.00                      | 354.49 | 352.49                                     | 3.50                         | 5.22                     |
| 2,4-D            | 639.00                      | 221.04 | 28.66                                      | 2.54                         | 4.84                     |
| dicamba          | 757.00                      | 221.04 | 63.27                                      | 2.47                         | 4.88                     |
| DEET             | 1.95                        | 191.27 | 70.17                                      | 4.99                         | 4.29                     |
| sulfoxaflor      | 750.00                      | 277.27 | 178.42                                     | 2.57                         | 3.93                     |

**Table S9.** Structure-based alignment assessment for wild type *Mus musculus* AChE inhibitors.

| Ligand<br>PDB | Ref.   | AutoDock                                    |                 | Vina   | DOCK6          |                | AutoDock                                  |                 | Vina   | DOCK6          |                |  |
|---------------|--------|---------------------------------------------|-----------------|--------|----------------|----------------|-------------------------------------------|-----------------|--------|----------------|----------------|--|
|               |        | BD <sup>a</sup>                             | BC <sup>b</sup> |        | R <sup>c</sup> | F <sup>d</sup> | BD <sup>a</sup>                           | BC <sup>b</sup> |        | R <sup>c</sup> | F <sup>d</sup> |  |
|               |        | <i>Experimental Conformation Re-Docking</i> |                 |        |                |                | <i>Randomized Conformation Re-Docking</i> |                 |        |                |                |  |
| <b>1J07</b>   | [SR1]  | 17.236                                      | 18.232          | 13.274 | 21.343         | 22.768         | 18.396                                    | 18.432          | 16.728 | 22.341         | 22.761         |  |
| <b>1N5M</b>   | [SR1]  | 3.942                                       | 4.231           | 4.241  | 5.941          | 6.928          | 3.726                                     | 3.246           | 5.921  | 6.314          | 7.043          |  |
| <b>1N5R</b>   | [SR1]  | 2.767                                       | 3.243           | 1.928  | 3.841          | 3.992          | 3.242                                     | 3.531           | 2.941  | 4.323          | 4.447          |  |
| <b>1Q83</b>   | [SR2]  | 2.072                                       | 2.576           | 1.248  | 2.761          | 2.997          | 2.437                                     | 3.231           | 1.764  | 3.347          | 3.471          |  |
| <b>1Q84</b>   | [SR2]  | 1.076                                       | 1.224           | 0.692  | 4.271          | 5.226          | 1.574                                     | 2.248           | 1.248  | 5.176          | 5.449          |  |
| <b>2C0P</b>   | [SR3]  | 7.321                                       | 8.246           | 5.494  | 9.274          | 10.111         | 8.321                                     | 9.326           | 6.724  | 12.471         | 13.226         |  |
| <b>2C0Q</b>   | [SR3]  | 8.436                                       | 9.072           | 6.726  | 11.246         | 13.276         | 8.773                                     | 9.323           | 2.892  | 14.178         | 14.326         |  |
| <b>2GYU</b>   | [SR4]  | 3.941                                       | 3.893           | 1.547  | 2.748          | 2.673          | 4.276                                     | 4.832           | 1.663  | 3.437          | 3.543          |  |
| <b>2GYV</b>   | [SR4]  | 2.996                                       | 2.934           | 1.894  | 2.896          | 2.937          | 2.993                                     | 2.837           | 1.893  | 3.324          | 3.333          |  |
| <b>2GYW</b>   | [SR4]  | 2.534                                       | 2.637           | 1.747  | 2.731          | 2.834          | 2.539                                     | 2.639           | 1.767  | 2.076          | 2.113          |  |
| <b>2H9Y</b>   | [SR5]  | 3.121                                       | 3.276           | 2.793  | 7.394          | 7.776          | 4.214                                     | 5.432           | 2.992  | 9.317          | 10.116         |  |
| <b>2HA0</b>   | [SR5]  | 1.974                                       | 2.127           | 2.432  | 3.293          | 4.727          | 2.126                                     | 3.213           | 2.748  | 5.471          | 5.557          |  |
| <b>2JEY</b>   | [SR6]  | 1.006                                       | 1.118           | 2.947  | 5.436          | 5.445          | 1.763                                     | 1.846           | 2.894  | 1.839          | 1.937          |  |
| <b>2JEZ</b>   | [SR6]  | 1.872                                       | 1.936           | 2.846  | 4.373          | 4.437          | 2.793                                     | 2.937           | 2.993  | 1.993          | 1.973          |  |
| <b>2JF0</b>   | [SR6]  | 2.034                                       | 2.122           | 2.373  | 3.391          | 4.937          | 2.184                                     | 2.617           | 2.446  | 1.643          | 1.643          |  |
| <b>2JGI</b>   | [SR7]  | 1.993                                       | 1.973           | 8.476  | 1.935          | 2.317          | 2.932                                     | 3.143           | 8.562  | 4.374          | 4.551          |  |
| <b>2WHP</b>   | [SR8]  | 2.967                                       | 2.939           | 1.747  | 1.993          | 2.074          | 3.327                                     | 3.446           | 1.754  | 1.236          | 1.279          |  |
| <b>2WHQ</b>   | [SR8]  | 2.224                                       | 2.517           | 1.647  | 2.851          | 2.935          | 3.247                                     | 3.536           | 1.673  | 1.973          | 1.984          |  |
| <b>2WHR</b>   | [SR8]  | 1.973                                       | 1.868           | 1.993  | 2.661          | 2.639          | 1.831                                     | 1.884           | 1.961  | 1.837          | 1.883          |  |
| <b>2WU3</b>   | [SR9]  | 2.831                                       | 2.993           | 2.713  | 2.743          | 2.839          | 3.936                                     | 3.974           | 2.831  | 2.532          | 2.631          |  |
| <b>2WU4</b>   | [SR9]  | 3.296                                       | 3.348           | 2.262  | 2.276          | 2.374          | 4.333                                     | 4.536           | 2.341  | 2.617          | 2.814          |  |
| <b>3ZLT</b>   | [SR10] | 1.276                                       | 2.574           | 1.894  | 2.761          | 2.432          | 2.574                                     | 3.473           | 1.964  | 2.714          | 2.971          |  |
| <b>3ZLU</b>   | [SR10] | 1.543                                       | 1.673           | 1.627  | 2.641          | 3.241          | 2.313                                     | 3.116           | 1.892  | 2.774          | 2.931          |  |
| <b>3ZLV</b>   | [SR10] | 2.056                                       | 2.157           | 1.942  | 3.417          | 3.776          | 2.746                                     | 3.547           | 1.972  | 2.561          | 2.549          |  |
| <b>4A16</b>   | [SR11] | 1.478                                       | 1.723           | 0.712  | 3.278          | 3.796          | 1.536                                     | 1.928           | 1.942  | 2.736          | 2.931          |  |
| <b>4A23</b>   | [SR12] | 4.334                                       | 4.593           | 2.347  | 2.459          | 2.547          | 4.763                                     | 4.863           | 2.492  | 3.913          | 3.977          |  |
| <b>4ARA</b>   | [SR12] | 4.328                                       | 4.446           | 1.336  | 2.583          | 2.593          | 4.331                                     | 4.371           | 1.368  | 2.031          | 2.213          |  |
| <b>4ARB</b>   | [SR12] | 3.287                                       | 3.371           | 0.946  | 1.943          | 2.074          | 4.328                                     | 4.463           | 1.032  | 1.224          | 1.237          |  |
| <b>4B7Z</b>   | [SR13] | 1.924                                       | 3.896           | 2.614  | 3.293          | 3.326          | 1.983                                     | 1.976           | 2.684  | 2.546          | 2.661          |  |
| <b>4B80</b>   | [SR13] | 1.791                                       | 1.931           | 2.761  | 2.791          | 3.763          | 1.883                                     | 1.936           | 2.781  | 3.073          | 3.116          |  |
| <b>4B81</b>   | [SR13] | 2.554                                       | 2.668           | 2.663  | 3.291          | 3.394          | 2.439                                     | 2.636           | 2.669  | 2.837          | 2.891          |  |
| <b>4B82</b>   | [SR13] | 2.437                                       | 2.673           | 3.617  | 8.639          | 8.743          | 2.693                                     | 2.721           | 3.613  | 4.116          | 4.227          |  |
| <b>4B83</b>   | [SR13] | 3.839                                       | 3.937           | 2.461  | 4.263          | 4.638          | 4.261                                     | 2.274           | 2.531  | 2.674          | 2.668          |  |
| <b>4B84</b>   | [SR13] | 2.673                                       | 2.769           | 3.334  | 4.293          | 4.398          | 3.296                                     | 3.297           | 3.557  | 4.132          | 4.339          |  |
| <b>4B85</b>   | [SR13] | 2.553                                       | 2.663           | 2.637  | 5.324          | 5.371          | 2.583                                     | 2.661           | 2.745  | 3.113          | 3.273          |  |
| <b>4BC0</b>   | [SR14] | 2.931                                       | 2.537           | 1.763  | 1.283          | 1.334          | 2.971                                     | 3.046           | 1.893  | 2.743          | 2.663          |  |
| <b>4BC1</b>   | [SR14] | 2.671                                       | 2.761           | 1.831  | 1.713          | 1.831          | 2.772                                     | 2.884           | 1.884  | 1.743          | 1.838          |  |
| <b>5DTJ</b>   | [SR15] | 4.231                                       | 4.447           | 2.398  | 6.341          | 6.477          | 8.392                                     | 10.326          | 2.576  | 2.838          | 3.091          |  |
| <b>5EHN</b>   | [SR16] | 3.928                                       | 3.936           | 6.893  | 5.432          | 5.543          | 4.326                                     | 4.436           | 7.452  | 6.831          | 6.373          |  |
| <b>5EHQ</b>   | [SR16] | 4.331                                       | 4.749           | 5.437  | 5.448          | 5.793          | 3.298                                     | 3.393           | 4.631  | 5.346          | 5.519          |  |
| <b>5EHZ</b>   | [SR16] | 4.237                                       | 4.563           | 4.831  | 6.831          | 6.939          | 4.237                                     | 4.117           | 4.448  | 3.931          | 4.126          |  |
| <b>5EIA</b>   | [SR16] | 6.891                                       | 6.661           | 11.839 | 5.237          | 5.831          | 6.921                                     | 6.974           | 12.903 | 9.313          | 9.884          |  |
| <b>5EIE</b>   | [SR16] | 7.327                                       | 6.971           | 8.396  | 8.329          | 8.437          | 7.432                                     | 8.063           | 8.996  | 7.439          | 7.661          |  |

|             |        |                                                |        |        |        |        |                                              |        |        |        |        |
|-------------|--------|------------------------------------------------|--------|--------|--------|--------|----------------------------------------------|--------|--------|--------|--------|
| <b>5EIH</b> | [SR16] | 1.561                                          | 1.663  | 1.941  | 8.883  | 8.736  | 1.763                                        | 1.833  | 1.893  | 2.354  | 2.931  |
| <b>5HCU</b> | [SR15] | 1.229                                          | 1.291  | 1.836  | 7.329  | 7.638  | 1.339                                        | 1.354  | 1.884  | 2.551  | 2.689  |
| DA          |        | 44.55%                                         | 40%    | 55.55  | 25.55% | 20%    | 34.44%                                       | 26.67% | 57.78% | 28.89% | 30%    |
|             |        | <i>Experimental Conformation Cross-Docking</i> |        |        |        |        | <i>Randomized Conformation Cross-Docking</i> |        |        |        |        |
| <b>1J07</b> | [SR1]  | 22.732                                         | 24.328 | 16.872 | 24.371 | 25.293 | 24.372                                       | 25.761 | 22.841 | 24.873 | 25.297 |
| <b>1N5M</b> | [SR1]  | 5.231                                          | 5.432  | 7.241  | 7.341  | 8.226  | 6.393                                        | 8.426  | 9.326  | 7.891  | 8.137  |
| <b>1N5R</b> | [SR1]  | 3.213                                          | 3.738  | 3.296  | 4.374  | 4.448  | 4.761                                        | 4.923  | 5.841  | 5.441  | 5.761  |
| <b>1Q83</b> | [SR2]  | 3.076                                          | 3.214  | 2.741  | 4.371  | 4.439  | 3.573                                        | 3.926  | 4.321  | 5.484  | 5.716  |
| <b>1Q84</b> | [SR2]  | 2.327                                          | 2.438  | 1.639  | 3.917  | 3.938  | 3.117                                        | 3.234  | 2.276  | 4.138  | 3.348  |
| <b>2C0P</b> | [SR3]  | 10.346                                         | 10.713 | 7.284  | 12.648 | 12.732 | 11.741                                       | 11.926 | 10.232 | 14.397 | 14.556 |
| <b>2C0Q</b> | [SR3]  | 10.437                                         | 10.891 | 2.736  | 12.435 | 12.681 | 10.437                                       | 10.576 | 12.984 | 13.874 | 13.943 |
| <b>2GYU</b> | [SR4]  | 4.663                                          | 4.379  | 1.743  | 2.792  | 3.014  | 4.679                                        | 4.699  | 1.937  | 2.804  | 2.814  |
| <b>2GYV</b> | [SR4]  | 2.991                                          | 3.039  | 1.935  | 2.934  | 2.973  | 3.042                                        | 3.037  | 2.047  | 2.942  | 2.763  |
| <b>2GYW</b> | [SR4]  | 2.629                                          | 2.693  | 1.874  | 7.471  | 7.536  | 2.671                                        | 2.675  | 1.963  | 7.463  | 7.437  |
| <b>2H9Y</b> | [SR5]  | 4.216                                          | 4.378  | 2.894  | 6.372  | 6.449  | 5.372                                        | 5.848  | 3.342  | 7.316  | 7.398  |
| <b>2HA0</b> | [SR5]  | 3.296                                          | 3.434  | 2.220  | 1.343  | 1.761  | 4.327                                        | 4.541  | 3.926  | 4.378  | 4.478  |
| <b>2JEY</b> | [SR6]  | 1.939                                          | 2.032  | 2.996  | 6.391  | 7.328  | 1.993                                        | 2.146  | 3.044  | 6.471  | 6.484  |
| <b>2JEZ</b> | [SR6]  | 1.937                                          | 2.044  | 2.910  | 7.341  | 7.391  | 1.984                                        | 1.989  | 2.963  | 7.461  | 7.473  |
| <b>2JF0</b> | [SR6]  | 2.543                                          | 2.633  | 2.537  | 4.393  | 4.551  | 2.591                                        | 2.607  | 2.668  | 4.591  | 4.666  |
| <b>2JGI</b> | [SR7]  | 2.726                                          | 2.774  | 9.373  | 2.937  | 3.026  | 2.831                                        | 2.841  | 10.374 | 3.116  | 3.273  |
| <b>2WHP</b> | [SR8]  | 3.039                                          | 3.046  | 1.836  | 2.591  | 2.671  | 2.116                                        | 3.598  | 1.936  | 2.741  | 2.794  |
| <b>2WHQ</b> | [SR8]  | 2.791                                          | 3.037  | 1.732  | 4.397  | 4.538  | 2.843                                        | 3.868  | 1.747  | 4.617  | 4.882  |
| <b>2WHR</b> | [SR8]  | 2.024                                          | 2.071  | 2.039  | 2.791  | 2.937  | 2.056                                        | 2.118  | 1.993  | 2.941  | 2.876  |
| <b>2WU3</b> | [SR9]  | 2.939                                          | 3.038  | 2.883  | 2.883  | 2.931  | 3.049                                        | 3.076  | 2.437  | 2.995  | 2.935  |
| <b>2WU4</b> | [SR9]  | 4.326                                          | 4.768  | 2.393  | 2.973  | 2.946  | 4.767                                        | 4.794  | 2.449  | 3.017  | 3.176  |
| <b>3ZLT</b> | [SR10] | 3.394                                          | 3.641  | 2.210  | 1.393  | 1.446  | 4.376                                        | 4.222  | 2.250  | 2.439  | 2.556  |
| <b>3ZLU</b> | [SR10] | 2.719                                          | 2.841  | 2.140  | 2.439  | 2.576  | 3.761                                        | 3.814  | 2.728  | 2.431  | 2.316  |
| <b>3ZLV</b> | [SR10] | 2.764                                          | 2.937  | 2.222  | 4.325  | 4.439  | 3.731                                        | 3.941  | 3.612  | 2.139  | 2.261  |
| <b>4A16</b> | [SR11] | 4.326                                          | 4.174  | 1.821  | 5.517  | 5.669  | 4.438                                        | 5.556  | 2.798  | 2.249  | 3.116  |
| <b>4A23</b> | [SR12] | 4.773                                          | 4.934  | 2.541  | 3.493  | 3.561  | 4.839                                        | 4.884  | 2.674  | 3.547  | 3.673  |
| <b>4ARA</b> | [SR12] | 4.543                                          | 4.631  | 1.559  | 4.293  | 4.316  | 4.661                                        | 4.679  | 1.791  | 4.397  | 4.318  |
| <b>4ARB</b> | [SR12] | 3.637                                          | 3.839  | 1.393  | 2.553  | 2.717  | 3.748                                        | 3.791  | 1.493  | 2.641  | 2.661  |
| <b>4B7Z</b> | [SR13] | 2.092                                          | 2.114  | 3.839  | 4.393  | 4.439  | 2.114                                        | 2.174  | 3.936  | 4.388  | 4.397  |
| <b>4B80</b> | [SR13] | 1.883                                          | 1.739  | 2.946  | 3.093  | 3.129  | 1.984                                        | 1.891  | 3.116  | 3.273  | 3.318  |
| <b>4B81</b> | [SR13] | 2.593                                          | 2.542  | 2.883  | 3.559  | 3.776  | 2.604                                        | 2.663  | 3.731  | 3.619  | 3.719  |
| <b>4B82</b> | [SR13] | 2.938                                          | 3.336  | 4.113  | 12.931 | 13.073 | 2.946                                        | 2.944  | 4.273  | 12.997 | 12.874 |
| <b>4B83</b> | [SR13] | 4.393                                          | 4.739  | 3.096  | 7.395  | 7.776  | 4.484                                        | 4.516  | 3.283  | 7.436  | 7.839  |
| <b>4B84</b> | [SR13] | 2.771                                          | 2.895  | 3.529  | 6.313  | 6.416  | 2.937                                        | 2.939  | 3.661  | 6.417  | 6.473  |
| <b>4B85</b> | [SR13] | 2.636                                          | 2.731  | 3.839  | 6.419  | 6.519  | 2.748                                        | 2.816  | 3.739  | 6.444  | 6.393  |
| <b>4BC0</b> | [SR14] | 3.041                                          | 3.077  | 1.984  | 2.193  | 2.293  | 3.247                                        | 3.346  | 1.996  | 2.273  | 2.439  |
| <b>4BC1</b> | [SR14] | 2.793                                          | 2.939  | 1.739  | 2.553  | 2.594  | 2.811                                        | 2.814  | 1.831  | 2.617  | 2.881  |
| <b>5DTJ</b> | [SR15] | 7.241                                          | 7.392  | 2.935  | 8.931  | 8.937  | 8.321                                        | 8.336  | 3.012  | 9.241  | 9.117  |
| <b>5EHN</b> | [SR16] | 4.436                                          | 4.776  | 7.394  | 6.931  | 7.438  | 4.371                                        | 4.384  | 8.349  | 6.971  | 6.593  |
| <b>5EHQ</b> | [SR16] | 4.363                                          | 4.362  | 6.883  | 6.771  | 7.014  | 4.444                                        | 4.472  | 6.931  | 6.761  | 6.831  |
| <b>5EHZ</b> | [SR16] | 4.373                                          | 4.351  | 6.831  | 6.931  | 7.226  | 4.831                                        | 4.829  | 6.831  | 6.943  | 6.933  |
| <b>5EIA</b> | [SR16] | 7.091                                          | 7.116  | 12.393 | 6.317  | 6.339  | 7.216                                        | 7.141  | 12.449 | 6.471  | 6.173  |
| <b>5EIE</b> | [SR16] | 7.438                                          | 7.691  | 9.837  | 10.439 | 10.739 | 7.519                                        | 7.516  | 10.241 | 10.558 | 10.441 |
| <b>5EIH</b> | [SR16] | 1.737                                          | 1.841  | 2.447  | 10.536 | 10.631 | 1.971                                        | 1.988  | 3.293  | 10.739 | 10.432 |

|             |        |        |        |        |        |        |        |        |        |        |        |
|-------------|--------|--------|--------|--------|--------|--------|--------|--------|--------|--------|--------|
| <b>5HCU</b> | [SR15] | 1.439  | 1.553  | 1.934  | 10.249 | 10.555 | 1.553  | 1.512  | 1.974  | 10.312 | 10.516 |
| DA          |        | 25.55% | 22.22% | 25.55% | 16.67% | 13.33% | 24.44% | 22.22% | 32.22% | 13.33% | 12.22% |

---

<sup>a</sup>Best docked conformation; <sup>b</sup>Best clustered conformation; <sup>c</sup>Rigid docking; <sup>d</sup>F - flexible docking.

**Table S10.** Structure-based alignment assessment for wild type *Homo sapiens* AChE inhibitors.

| Ligand      | Ref.   | AutoDock                                       |        | Vina   | DOCK6  |        | AutoDock                                     |        | Vina   | DOCK6  |        |
|-------------|--------|------------------------------------------------|--------|--------|--------|--------|----------------------------------------------|--------|--------|--------|--------|
|             |        | BDa                                            | BCb    |        | Rc     | Fd     | BDa                                          | BCb    |        | Rc     | Fd     |
|             |        | <i>Experimental Conformation Re-Docking</i>    |        |        |        |        | <i>Randomized Conformation Re-Docking</i>    |        |        |        |        |
| <b>2X8B</b> | [SR17] | 5.437                                          | 4.974  | 7.437  | 1.893  | 1.764  | 5.551                                        | 5.831  | 6.393  | 1.836  | 1.848  |
| <b>4BDT</b> | [SR18] | 2.937                                          | 2.973  | 1.697  | 2.713  | 2.741  | 3.491                                        | 3.617  | 1.784  | 2.973  | 2.741  |
| <b>4EY5</b> | [94]   | 4.376                                          | 4.117  | 1.761  | 2.892  | 2.393  | 4.372                                        | 4.391  | 1.931  | 2.931  | 3.073  |
| <b>4EY6</b> | [94]   | 2.561                                          | 2.984  | 1.936  | 3.946  | 3.834  | 3.072                                        | 3.092  | 2.032  | 4.032  | 4.417  |
| <b>4EY7</b> | [94]   | 3.976                                          | 3.761  | 1.774  | 2.176  | 2.768  | 4.894                                        | 4.932  | 1.559  | 2.813  | 2.935  |
| <b>4M0E</b> | [SR19] | 1.773                                          | 2.671  | 1.076  | 2.076  | 2.224  | 1.996                                        | 2.081  | 1.339  | 1.983  | 1.996  |
| <b>4M0F</b> | [SR19] | 2.261                                          | 2.558  | 2.761  | 1.743  | 1.839  | 2.837                                        | 2.841  | 2.547  | 1.784  | 1.776  |
| <b>5FOQ</b> | [SR20] | 2.936                                          | 3.041  | 2.076  | 3.437  | 3.338  | 3.492                                        | 3.504  | 2.841  | 3.439  | 3.513  |
| DA          |        | 37.5%                                          | 18.75% | 75.00% | 50.00% | 50.00% | 18.75%                                       | 12.50% | 68.75% | 56.25% | 56.25% |
|             |        | <i>Experimental Conformation Cross-Docking</i> |        |        |        |        | <i>Randomized Conformation Cross-Docking</i> |        |        |        |        |
| <b>2X8B</b> | [SR17] | 6.838                                          | 7.324  | 4.393  | 1.949  | 1.838  | 5.652                                        | 5.559  | 6.327  | 2.436  | 2.389  |
| <b>4BDT</b> | [SR18] | 2.392                                          | 2.224  | 1.761  | 2.976  | 3.721  | 3.496                                        | 3.517  | 2.937  | 3.218  | 3.261  |
| <b>4EY5</b> | [94]   | 4.886                                          | 4.596  | 1.948  | 3.042  | 2.984  | 4.733                                        | 4.638  | 2.996  | 3.491  | 3.476  |
| <b>4EY6</b> | [94]   | 2.731                                          | 2.837  | 2.271  | 1.768  | 2.072  | 3.017                                        | 2.983  | 2.746  | 1.883  | 1.906  |
| <b>4EY7</b> | [94]   | 3.931                                          | 3.915  | 1.936  | 1.931  | 1.836  | 4.931                                        | 4.873  | 1.582  | 1.974  | 1.983  |
| <b>4M0E</b> | [SR19] | 1.924                                          | 2.079  | 1.948  | 2.714  | 2.932  | 2.041                                        | 2.116  | 1.564  | 2.892  | 2.974  |
| <b>4M0F</b> | [SR19] | 2.736                                          | 2.839  | 2.263  | 2.046  | 2.591  | 2.888                                        | 2.913  | 2.673  | 2.117  | 2.217  |
| <b>5FOQ</b> | [SR20] | 3.498                                          | 3.736  | 2.437  | 3.966  | 4.574  | 3.884                                        | 3.941  | 2.932  | 3.765  | 3.964  |
| DA          |        | 31.25%                                         | 25%    | 68.75% | 56.26% | 50%    | 12.5%                                        | 18.75% | 56.25% | 43.75% | 43.75% |

<sup>a</sup>Best docked conformation; <sup>b</sup>Best clustered conformation; <sup>c</sup>Rigid docking; <sup>d</sup>F - flexible docking.

**Table S11.** Binding free energies and individual energy terms of *Mus Musculus* (upper part) and *Homo sapiens* (lower part) AChE in complex with acetylcholine and various targeted pesticides inhibitors.

| Complex                                  | $\Delta E_{\text{ele}}^a$<br>(kcal/mol) | $\Delta E_{\text{vdw}}^b$<br>(kcal/mol) | $\Delta G_{\text{solv}}^c$<br>(kcal/mol) | $T\Delta S^a$<br>(kcal/mol) | $\Delta G_{\text{bind}}^e$<br>(kcal/mol) |
|------------------------------------------|-----------------------------------------|-----------------------------------------|------------------------------------------|-----------------------------|------------------------------------------|
| <b>atrazine-<i>m</i>AChE<sup>f</sup></b> | -41.48±0.62                             | -51.24±0.91                             | 4.74±0.45                                | -8.74±0.38                  | -79.24±0.18                              |
| <b>propazine-<i>m</i>AChE</b>            | -52.43±0.47                             | -50.82±0.35                             | 5.22±0.15                                | -26.00±0.52                 | -72.03±0.26                              |
| <b>simazine-<i>m</i>AChE</b>             | -53.26±0.41                             | -50.24±0.63                             | 5.26±0.73                                | -28.70±0.51                 | -69.54±0.32                              |
| <b>carbofuran-<i>m</i>AChE</b>           | -52.84±0.88                             | -55.28±0.61                             | 4.37±0.28                                | -33.32±0.57                 | -70.43±0.44                              |
| <b>monocrotophos-<i>m</i>AChE</b>        | -58.43±0.32                             | -39.26±0.58                             | 8.24±0.38                                | -33.99±0.39                 | -55.46±0.75                              |
| <b>dimethoate-<i>m</i>AChE</b>           | -61.24±0.73                             | -31.36±0.33                             | 9.27±0.27                                | -30.77±0.22                 | -52.56±0.43                              |
| <b>carbaryl-<i>m</i>AChE</b>             | -51.32±0.38                             | -49.26±0.68                             | 5.41±0.86                                | -46.19±0.92                 | -48.98±0.44                              |
| <b>tebufenozide-<i>m</i>AChE</b>         | -41.39±0.41                             | -39.28±0.19                             | 4.28±0.36                                | -50.63±0.73                 | -25.76±0.88                              |
| <b>imidacloprid-<i>m</i>AChE</b>         | -38.26±0.78                             | -51.43±0.28                             | 6.28±0.92                                | -27.45±0.92                 | -55.96±0.47                              |
| <b>acetamiprid-<i>m</i>AChE</b>          | -26.37±0.99                             | -58.24±0.53                             | 6.32±0.24                                | -24.93±0.67                 | -53.36±0.65                              |
| <b>diuron-<i>m</i>AChE</b>               | -31.46±0.26                             | -49.28±0.89                             | 6.03±0.55                                | -27.87±0.93                 | -46.84±0.95                              |
| <b>monuron-<i>m</i>AChE</b>              | -35.24±0.51                             | -43.28±0.49                             | 6.33±0.37                                | -29.66±0.63                 | -42.53±0.94                              |
| <b>linuron-<i>m</i>AChE</b>              | -41.23±0.41                             | -41.26±0.29                             | 6.05±0.36                                | -37.50±0.72                 | -38.94±0.16                              |
| <b>acetylcholine-<i>m</i>AChE</b>        | -43.23±0.31                             | -46.98±0.63                             | 5.28±0.48                                | -53.48±0.73                 | -31.45±0.74                              |
| <b>atrazine-<i>h</i>AChE<sup>g</sup></b> | -53.31±0.62                             | -41.76±0.91                             | 5.74±0.35                                | -8.92±0.47                  | -80.41±0.34                              |
| <b>propazine-<i>h</i>AChE</b>            | -58.36±0.47                             | -47.72±0.35                             | 5.15±0.15                                | -29.00±0.41                 | -71.93±0.53                              |
| <b>simazine-<i>h</i>AChE</b>             | -57.62±0.74                             | -51.34±0.41                             | 5.92±0.51                                | -34.21±0.83                 | -68.83±0.61                              |
| <b>carbofuran-<i>h</i>AChE</b>           | -56.63±0.88                             | -54.82±0.61                             | 4.95±0.31                                | -34.56±0.42                 | -71.94±0.31                              |
| <b>monocrotophos-<i>h</i>AChE</b>        | -64.25±0.32                             | -31.84±0.73                             | 7.89±0.51                                | -33.38±0.51                 | -54.82±0.96                              |
| <b>dimethoate-<i>h</i>AChE</b>           | -58.43±0.51                             | -32.72±0.51                             | 8.56±0.46                                | -28.94±0.68                 | -53.65±0.93                              |
| <b>carbaryl-<i>h</i>AChE</b>             | -53.61±0.63                             | -48.26±0.22                             | 5.82±0.73                                | -47.73±0.39                 | -48.32±0.63                              |
| <b>tebufenozide-<i>h</i>AChE</b>         | -40.21±0.37                             | -42.78±0.22                             | 4.79±0.41                                | -52.38±0.52                 | -25.82±0.83                              |
| <b>imidacloprid-<i>h</i>AChE</b>         | -47.31±0.83                             | -50.26±0.45                             | 7.11±0.92                                | -31.42±0.99                 | -59.04±0.73                              |
| <b>acetamiprid-<i>h</i>AChE</b>          | -24.52±0.83                             | -58.73±0.26                             | 6.57±0.41                                | -22.70±0.42                 | -53.98±0.68                              |
| <b>diuron-<i>h</i>AChE</b>               | -29.37±0.72                             | -50.74±0.51                             | 6.17±0.42                                | -27.72±0.93                 | -46.22±0.92                              |
| <b>monuron-<i>h</i>AChE</b>              | -36.73±0.41                             | -44.17±0.28                             | 6.54±0.81                                | -31.24±0.73                 | -43.12±0.77                              |
| <b>linuron-<i>h</i>AChE</b>              | -41.78±0.41                             | -42.03±0.61                             | 6.52±0.61                                | -37.57±0.74                 | -39.72±0.53                              |
| <b>acetylcholine-<i>h</i>AChE</b>        | -42.42±0.62                             | -48.35±0.22                             | 5.41±0.83                                | -52.69±0.82                 | -32.67±0.31                              |

<sup>a</sup>Electrostatic energy difference; <sup>b</sup>van der Waals energy difference; <sup>c</sup>Solvation free energy; <sup>d</sup>The entropy change; <sup>e</sup>Predicted binding free energy; <sup>f</sup>*Mus musculus* AChE; <sup>g</sup>*Homo sapiens* AChE.



**Table S12.** Linear regression parameters for QSAR model 5 (acute toxicity against *Mus musculus*).

| Compound             | LD <sub>50</sub><br>(mg/kg) | MW     | $\Delta G_{\text{binding}}$<br>(kcal/mol) | Exp. pLD <sub>50</sub> | Fitted pLD <sub>50</sub> |
|----------------------|-----------------------------|--------|-------------------------------------------|------------------------|--------------------------|
| <b>atrazine</b>      | 0.85                        | 215.69 | -9.50                                     | 5.40                   | 5.05                     |
| <b>propazin</b>      | 3.18                        | 229.71 | -9.20                                     | 4.86                   | 4.81                     |
| <b>simazine</b>      | 5                           | 201.66 | -8.70                                     | 4.61                   | 4.42                     |
| <b>carbofuran</b>    | 2                           | 221.11 | -8.70                                     | 5.04                   | 4.42                     |
| <b>monocrotophos</b> | 14                          | 223.16 | -8.40                                     | 4.20                   | 4.18                     |
| <b>dimethoate</b>    | 60                          | 229.25 | -8.20                                     | 3.58                   | 4.02                     |
| <b>carbaryl</b>      | 100                         | 201.22 | -6.10                                     | 3.30                   | 2.37                     |
| <b>tebufenozone</b>  | 5000                        | 352.48 | -7.50                                     | 1.85                   | 3.47                     |
| <b>imidacloprid</b>  | 131                         | 269.69 | -7.80                                     | 3.31                   | 3.71                     |
| <b>acetamiprid</b>   | 184                         | 221.69 | -8.10                                     | 3.08                   | -2.44                    |
| <b>diuron</b>        | 500                         | 233.09 | -6.50                                     | 2.67                   | 2.68                     |
| <b>monuron</b>       | 1700                        | 198.65 | -6.20                                     | 2.07                   | 2.45                     |
| <b>linuron</b>       | 2400                        | 249.09 | -5.30                                     | 2.02                   | 1.74                     |

**Table S13.** External validation of QSAR model 5 (acute toxicity against *Mus musculus*).

| Compound                | LD <sub>50</sub><br>(mg/kg) | MW     | $\Delta G_{\text{binding}}$<br>(kcal/mol) | Exp. pLD <sub>50</sub> | Fitted pLD <sub>50</sub> |
|-------------------------|-----------------------------|--------|-------------------------------------------|------------------------|--------------------------|
| <b>azamethiphos</b>     | 1040.00                     | 324.68 | -8.10                                     | 4.07                   | 3.95                     |
| <b>azinphos-methyl</b>  | 7.00                        | 317.32 | -7.80                                     | 6.25                   | 3.71                     |
| <b>chlorpyrifos</b>     | 2000.00                     | 350.59 | -7.60                                     | 3.79                   | 3.55                     |
| <b>DDVP</b>             | 17.00                       | 220.98 | -5.30                                     | 5.86                   | 1.74                     |
| <b>diazinon</b>         | 66.00                       | 304.35 | -8.00                                     | 5.27                   | 3.87                     |
| <b>fenitrothion</b>     | 500.00                      | 277.23 | -7.70                                     | 4.39                   | 3.63                     |
| <b>glyphosate</b>       | 5000.00                     | 169.07 | -4.90                                     | 3.39                   | 1.42                     |
| <b>malathion</b>        | 290.00                      | 330.36 | -6.80                                     | 4.63                   | 2.92                     |
| <b>methyl parathion</b> | 18.00                       | 263.21 | -7.20                                     | 5.84                   | 3.24                     |
| <b>naled (dibrom)</b>   | 160.00                      | 380.78 | -5.70                                     | 4.89                   | 2.05                     |
| <b>parathion</b>        | 2.00                        | 291.26 | -7.00                                     | 6.79                   | 3.08                     |
| <b>phosmet</b>          | 113.00                      | 317.32 | -7.80                                     | 5.04                   | 3.71                     |
| <b>TCVP</b>             | 465.00                      | 365.96 | -8.30                                     | 4.42                   | 4.10                     |
| <b>terbufos</b>         | 1.60                        | 288.43 | -5.20                                     | 6.89                   | 1.66                     |
| <b>methiocarb</b>       | 350.00                      | 225.31 | -7.00                                     | 4.55                   | 3.08                     |
| <b>methomyl</b>         | 12.00                       | 162.21 | -5.30                                     | 6.01                   | 1.74                     |
| <b>oxamyl</b>           | 5.40                        | 219.26 | -6.40                                     | 6.36                   | 2.61                     |
| <b>DDT</b>              | 113.00                      | 354.49 | -9.10                                     | 5.04                   | 4.74                     |
| <b>2,4-D</b>            | 639.00                      | 221.04 | -7.00                                     | 4.29                   | 3.08                     |
| <b>dicamba</b>          | 757.00                      | 221.04 | -6.90                                     | 4.21                   | 3.00                     |
| <b>DEET</b>             | 1.95                        | 191.27 | -7.80                                     | 6.80                   | 3.71                     |
| <b>sulfoxaflor</b>      | 750.00                      | 277.27 | -8.30                                     | 4.22                   | 4.10                     |

**Table S14.** Linear regression parameters for QSAR model 5 (acute toxicity against *Homo sapiens*).

| Compound             | LD <sub>50</sub><br>(mg/kg) | MW     | $\Delta G_{\text{binding}}$<br>(kcal/mol) | Calculated pLD <sub>50</sub> | Fitted pLD <sub>50</sub> |
|----------------------|-----------------------------|--------|-------------------------------------------|------------------------------|--------------------------|
| <b>atrazine</b>      | 0.07                        | 215.69 | -10.10                                    | 6.50                         | 5.52                     |
| <b>propazin</b>      | 0.26                        | 229.71 | -9.70                                     | 5.95                         | 5.21                     |
| <b>simazine</b>      | 0.41                        | 201.66 | -9.10                                     | 5.70                         | 4.74                     |
| <b>carbofuran</b>    | 0.16                        | 221.11 | -9.60                                     | 6.14                         | 5.13                     |
| <b>monocrotophos</b> | 1.14                        | 223.16 | -8.60                                     | 5.29                         | 4.34                     |
| <b>dimethoate</b>    | 4.86                        | 229.25 | -8.30                                     | 4.67                         | 4.10                     |
| <b>carbaryl</b>      | 8.11                        | 201.22 | -7.80                                     | 4.39                         | 3.71                     |
| <b>tebufenozide</b>  | 405.40                      | 352.48 | -5.60                                     | 2.94                         | 1.98                     |
| <b>imidacloprid</b>  | 10.62                       | 269.69 | -8.10                                     | 4.40                         | 3.95                     |
| <b>acetamiprid</b>   | 14.92                       | 221.69 | -7.70                                     | 4.17                         | 3.63                     |
| <b>diuron</b>        | 40.54                       | 233.09 | -6.90                                     | 3.76                         | 3.00                     |
| <b>monuron</b>       | 137.84                      | 198.65 | -6.70                                     | 3.16                         | 2.84                     |
| <b>linuron</b>       | 194.59                      | 249.09 | -5.90                                     | 3.11                         | 2.21                     |

**Table S15.** External validation of QSAR model 5 (acute toxicity against *Homo sapiens*).

| Compound                | LD <sub>50</sub><br>(mg/kg) | MW     | $\Delta G_{\text{binding}}$<br>(kcal/mol) | Calculated pLD <sub>50</sub> | Fitted pLD <sub>50</sub> |
|-------------------------|-----------------------------|--------|-------------------------------------------|------------------------------|--------------------------|
| <b>azamethiphos</b>     | 1040.00                     | 324.68 | -8.20                                     | 2.49                         | 4.03                     |
| <b>azinphos-methyl</b>  | 7.00                        | 317.32 | -8.00                                     | 4.66                         | 3.87                     |
| <b>chlorpyrifos</b>     | 2000.00                     | 350.59 | -8.10                                     | 2.24                         | 3.95                     |
| <b>DDVP</b>             | 17.00                       | 220.98 | -5.40                                     | 4.11                         | 1.82                     |
| <b>diazinon</b>         | 66.00                       | 304.35 | -7.80                                     | 3.66                         | 3.71                     |
| <b>fenitrothion</b>     | 500.00                      | 277.23 | -7.90                                     | 2.74                         | 3.79                     |
| <b>glyphosate</b>       | 5000.00                     | 169.07 | -4.90                                     | 1.53                         | 1.42                     |
| <b>malathion</b>        | 290.00                      | 330.36 | -6.30                                     | 3.06                         | 2.53                     |
| <b>methyl parathion</b> | 18.00                       | 263.21 | -7.50                                     | 4.17                         | 3.47                     |
| <b>naled (dibrom)</b>   | 160.00                      | 380.78 | -5.70                                     | 3.38                         | 2.05                     |
| <b>parathion</b>        | 2.00                        | 291.26 | -7.90                                     | 5.16                         | 3.79                     |
| <b>phosmet</b>          | 113.00                      | 317.32 | -8.20                                     | 3.45                         | 4.03                     |
| <b>TCVP</b>             | 465.00                      | 365.96 | -8.00                                     | 2.90                         | 3.87                     |
| <b>terbufos</b>         | 1.60                        | 288.43 | -4.90                                     | 5.26                         | 1.42                     |
| <b>methiocarb</b>       | 350.00                      | 225.31 | -7.80                                     | 2.81                         | 3.71                     |
| <b>methomyl</b>         | 12.00                       | 162.21 | -5.40                                     | 4.13                         | 1.82                     |
| <b>oxamyl</b>           | 5.40                        | 219.26 | -6.30                                     | 4.61                         | 2.53                     |
| <b>DDT</b>              | 113.00                      | 354.49 | -9.20                                     | 3.50                         | 4.81                     |
| <b>2,4-D</b>            | 639.00                      | 221.04 | -7.50                                     | 2.54                         | 3.47                     |
| <b>dicamba</b>          | 757.00                      | 221.04 | -7.30                                     | 2.47                         | 3.32                     |
| <b>DEET</b>             | 1.95                        | 191.27 | -7.90                                     | 4.99                         | 3.79                     |
| <b>sulfoxaflor</b>      | 750.00                      | 277.27 | -8.70                                     | 2.57                         | 4.42                     |

## Supplementary material references (SRs)

- SR1. Bourne, Y.; Taylor, P.; Radić, Z.; Marchot, P. Structural insights into ligand interactions at the acetylcholinesterase Peripheral Anionic Site. *EMBO J* **2003**, *22*, 1–12. DOI: 10.1093/emboj/cdg005
- SR2. Bourne, Y.; Kolb, H.C.; Radić, Z.; Sharpless, K.B.; Taylor, P.; Marchot, P. Freeze-frame inhibitor captures acetylcholinesterase in a unique conformation. *Proc Natl Acad Sci USA* **2004**, *101*, 1449–1454. DOI: 10.1073/pnas.0308206100
- SR3. Ekstrom, F.; Akfur, C.; Tunemalm, A.-K.; Lundberg, S. Structural changes of phenylalanine 338 and histidine 447 revealed by the crystal structures of tabun-inhibited murine acetylcholinesterase. *Biochemistry* **2006**, *45*, 74–81. DOI: 10.1021/bi051286t
- SR4. Ekstrom, F.; Pang, Y.P.; Boman, M.; Artursson, E.; Akfur, C.; Borjegen, S. Crystal structures of acetylcholinesterase in complex with HI-6, ortho-7 and obidoxime: Structural basis for differences in the ability to reactivate tabun conjugates. *Biochem Pharmacol* **2006**, *72*, 597–607. DOI: 10.1016/j.bcp.2006.05.027
- SR5. Bourne, Y.; Radić, Z.; SulzenbAChEr, G.; Kim, E.; Taylor, P.; Marchot, P. Substrate and product trafficking through the active center gorge of acetylcholinesterase analyzed by crystallography and equilibrium binding. *J Biol Chem* **2006**, *281*, 29256–29267. DOI: 10.1074/jbc.M603018200
- SR6. Ekstrom, F.J.; Astot, C.; Pang, Y.P. Novel nerve-agent antidote design based on crystallographic and mass spectrometric analyses of tabun-conjugated acetylcholinesterase in complex with antidotes. *Clin Pharmacol Ther* **2007**, *82*, 282–293. DOI: 10.1038/sj.clpt.6100151
- SR7. Hornberg, A.; Tunemalm, A.K.; Ekstrom, F. Crystal structures of acetylcholinesterase in complex with organophosphorus compounds suggest that the acyl pocket modulates the aging reaction by precluding the formation of the trigonal bipyramidal transition state. *Biochemistry* **2007**, *46*, 4815–4825. DOI: 10.1021/bi0621361
- SR8. Ekstrom, F.; Hornberg, A.; Artursson, E.; Hammarstrom, L.G.; Schneider, G.; Pang, Y.P. Structure of HI-6•sarin-acetylcholinesterase determined by x-ray crystallography and molecular dynamics simulation: Reactivator mechanism and design. *Plos One* **2009**, *4*, e5957 1–19. DOI: 10.1371/journal.pone.0005957
- SR9. Hornberg, A.; Artursson, E.; Warme, R.; Pang, Y-P.; Ekstrom, F. Crystal structures of oxime-bound fenamiphos-acetylcholinesterases: Reactivation involving flipping of the His447 ring to form a reactive Glu334-His447-oxime triad. *Biochem Pharmacol* **2010**, *79*, 507–515. DOI: 10.1016/j.bcp.2009.08.027
- SR10. Artursson, E.; Andersson, P.O.; Akfur, C.; Linusson, A.; Borjegen, S.; Ekstrom, F. Catalytic-site conformational equilibrium in nerve-agent adducts of acetylcholinesterase: Possible implications for the HI-6 antidote substrate specificity. *Biochem Pharmacol* **2013**, *85*, 1389–1397. DOI: 10.1016/j.bcp.2013.01.016
- SR11. Ronco, C.; Carletti, E.; Colletier, J-P.; Weik, M.; Nachon, F.; Jean, L.; Renard, P-Y. Huprine derivatives as sub-nanomolar human acetylcholinesterase inhibitors: From rational design to validation by x-ray crystallography. *ChemMedChem* **2012**, *7*, 400–405. DOI: 10.1002/cmde.201100438
- SR12. Berg, L.; Andersson, C.D.; Artursson, E.; Hornberg, A.; Tunemalm, A-K.; Linusson, A.; Ekstrom, F. Targeting acetylcholinesterase: Identification of chemical leads by high throughput screening,

- structure determination and molecular modelling. *Plos One* **2011**, *6*, e26039 1–12. DOI: 10.1371/journal.pone.0026039
- SR13. Andersson, C.D.; Forsgren, N.; Akfur, C.; Allgardsson, A.; Berg, L.; Engdahl, C.; Qian, W.; Ekstrom, F.; Linusson, A. Divergent structure-activity relationships of structurally similar acetylcholinesterase inhibitors. *J Med Chem* **2013**, *56*, 7615–7624. DOI: 10.1021/jm400990p
- SR14. Carletti, E.; Colletier, J-P.; Schopfer, L.M.; Santoni, G.; Masson, P.; Lockridge, O.; Nachon, F.; Weik, M. Inhibition pathways of the potent organophosphate CBDP with cholinesterases revealed by x-ray crystallographic snapshots and mass spectrometry. *Chem Res Toxicol* **2013**, *26*, 280–289. DOI: 10.1021/tx3004505
- SR15. Katz, F.S.; Pecic, S.; Tran, T.H.; Trakht, I.; Schneider, L.; Zhu, Z.; Ton-That, L.; Luzac, M.; Zlatanovic, V.; Damera, S.; Macdonald, J.; Landry, D.W.; Tong, L.; Stojanovic, M.N. Discovery of new classes of compounds that reactivate acetylcholinesterase inhibited by organophosphates. *ChemBioChem* **2015**, *16*, 2205–2215. DOI: 10.1002/cbic.201500348
- SR16. Bourne, Y.; Sharpless, K.B.; Taylor, P.; Marchot, P. Steric and dynamic parameters influencing *in situ* cycloadditions to form triazole inhibitors with crystalline acetylcholinesterase. *J Am Chem Soc* **2016**, *138*, 1611–1621. DOI: 10.1021/jacs.5b11384
- SR17. Carletti, E.; Colletier, J-P.; Dupeux, F.; Trovaslet, M.; Masson, P.; Nachon, F. Structural evidence that human acetylcholinesterase inhibited by tabun ages through o-dealkylation. *J Med Chem* **2010**, *53*, 4002–4008. DOI: 10.1021/jm901853b
- SR18. Nachon, F.; Carletti, E.; Ronco, C.; Trovaslet, M.; Nicolet, Y.; Jean, L.; Renard, P.Y. Crystal structures of human cholinesterases in complex with huprine w and tacrine: Elements of specificity for anti-Alzheimer's drugs targeting acetyl- and butyryl-cholinesterase. *Biochem J* **2013**, *453*, 393–399. DOI: 10.1042/BJ20130013
- SR19. Cheung, J.; Gary, E.N.; Shiomi, K.; Rosenberry, T.L. Structures of human acetylcholinesterase bound to dihydrotanshinone i and territrem b show peripheral site flexibility. *ACS Med Chem Lett* **2013**, *4*, 1091–1096. DOI: 10.1021/ml400304w
- SR20. Berg, L.; Mishra, B.K.; Andersson, C.D.; Ekstrom, F.; Linusson, A. The nature of activated non-classical hydrogen bonds: A case study on acetylcholinesterase-ligand complexes. *Chemistry* **2016**, *22*, 2672–2681. DOI: 10.1002/chem.201503973
